# Supplementary material for: Synthesis and Cytotoxic Activity of 1,2,4-Triazolo-Linked Bis-Indolyl Conjugates as Dual Inhibitors of Tankyrase and PI3K
Source: MDPI journal article supplement (doi:10.3390/molecules27217642), 2022-11-07
Supplement: s1 [file s1]

## List of the Contents

|                                                                          |           |
|--------------------------------------------------------------------------|-----------|
| Dose response curve.....                                                 | Figure S1 |
| Docking images.....                                                      | Figure S2 |
| $^1\text{H}$ , $^{13}\text{C}$ NMR and Mass copies of all products ..... | Figure S3 |

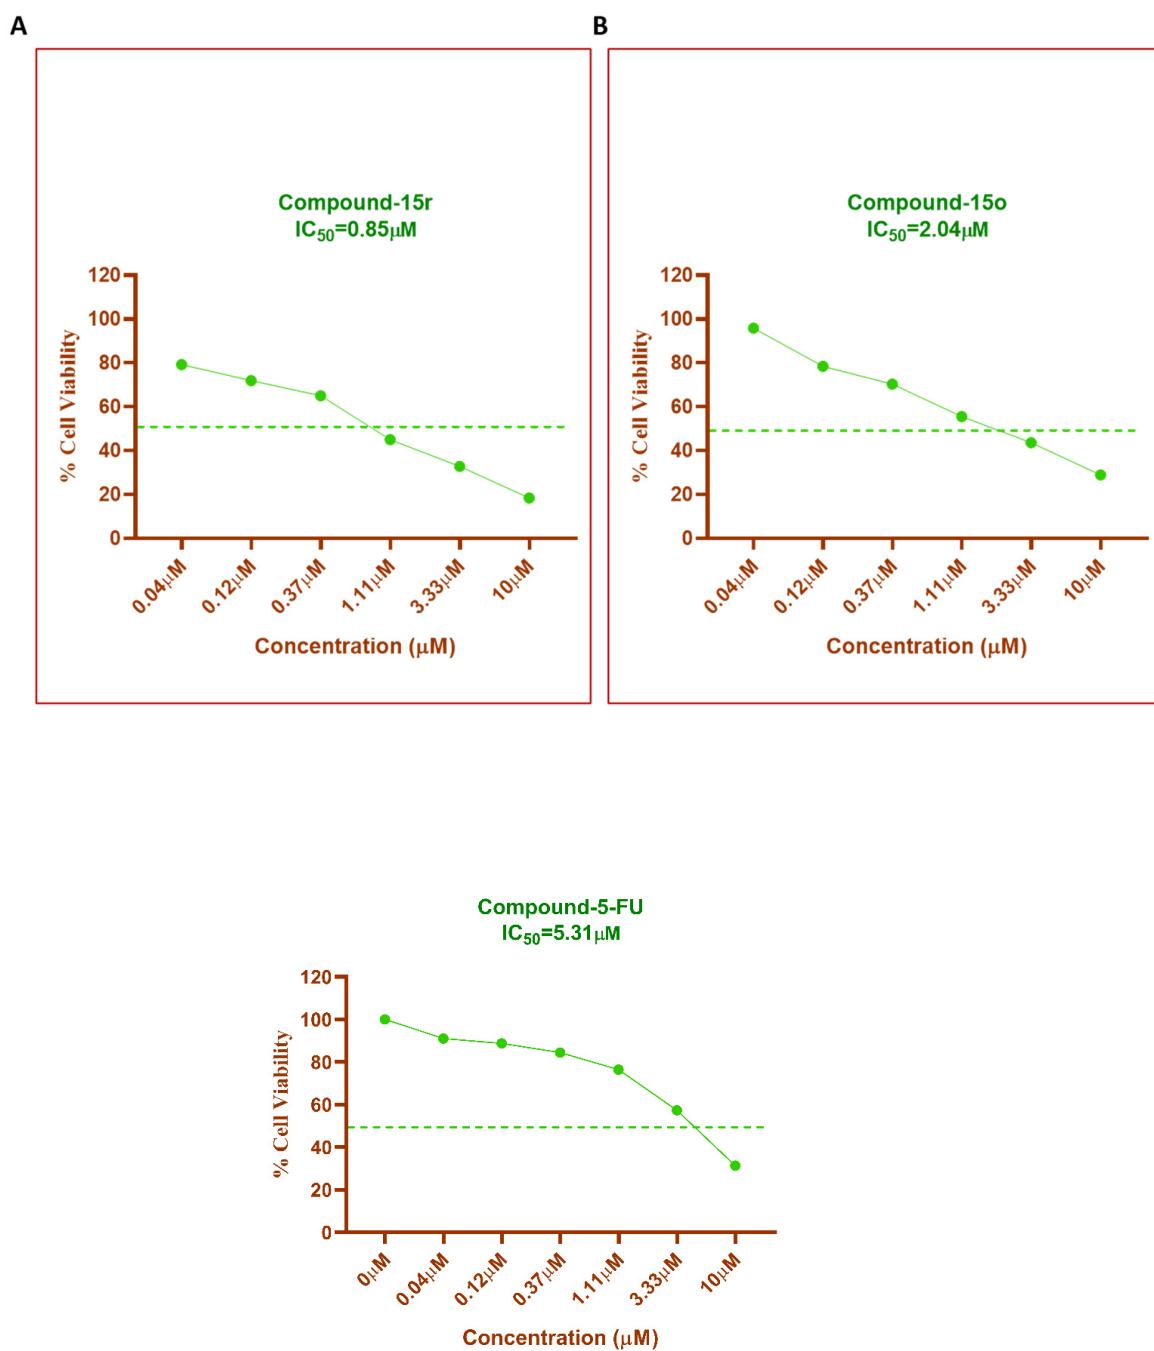

**Figure S1:** Dose Response Curves for 15r, 15o and Standard compounds against HT-29 colon cancer cell lines.

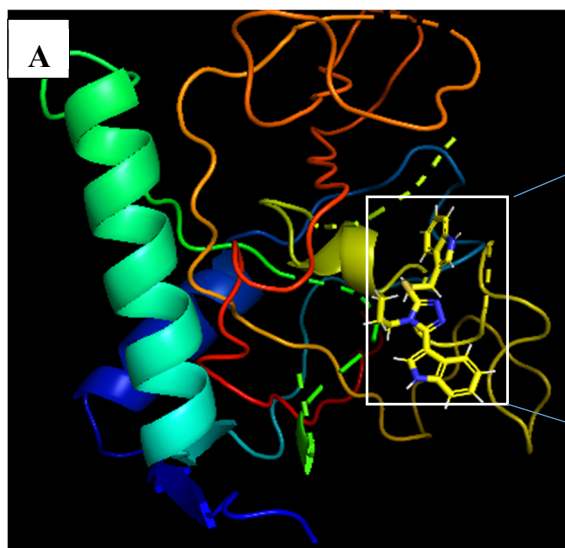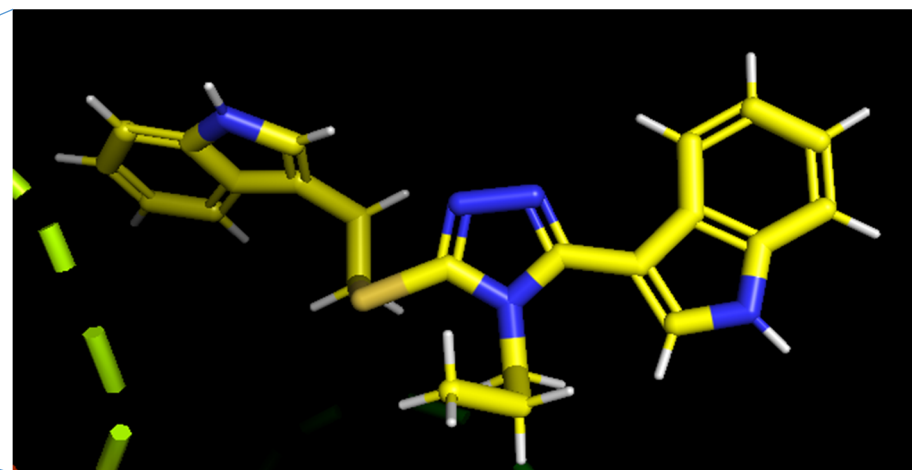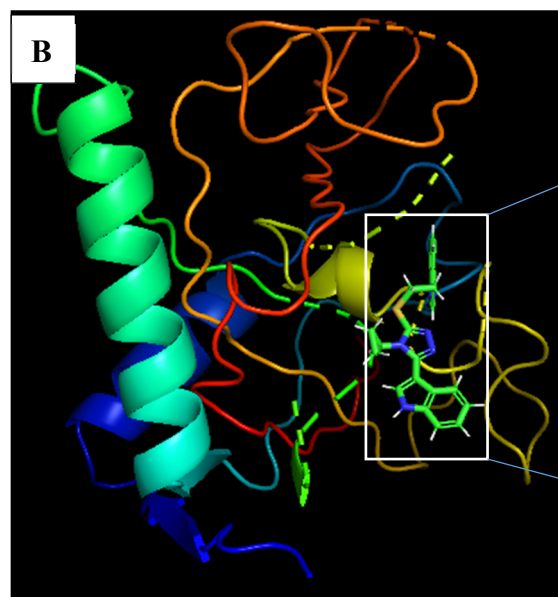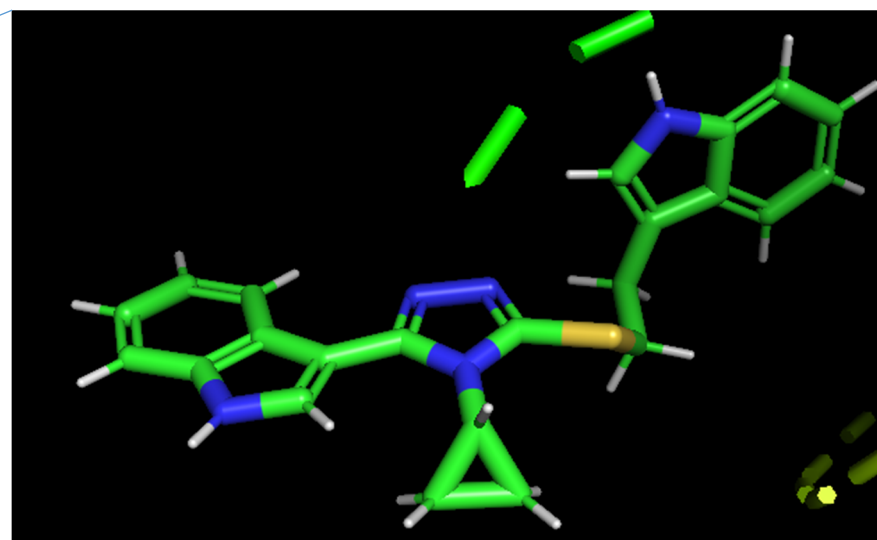

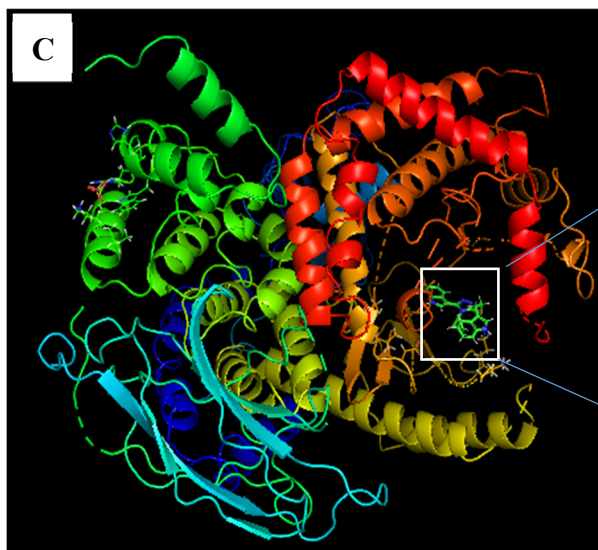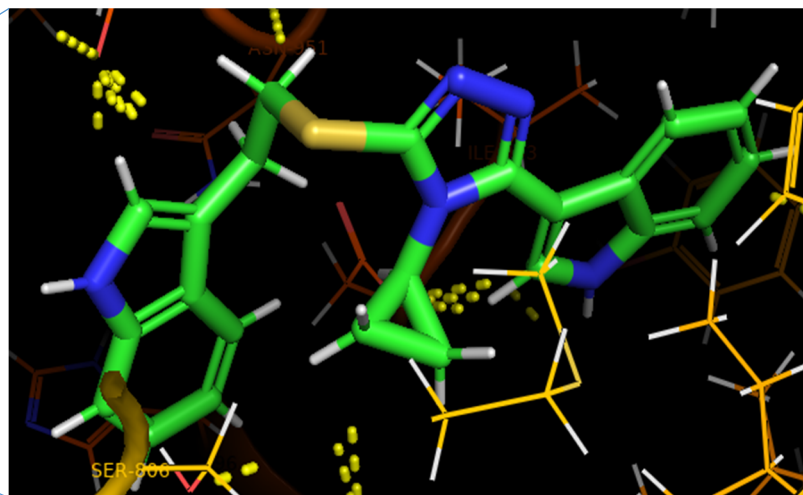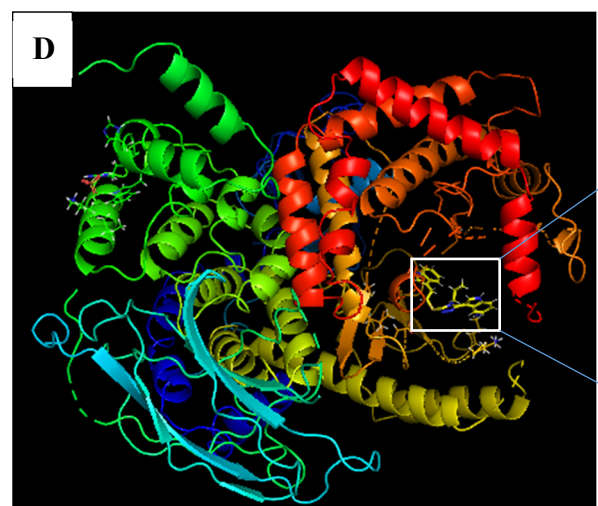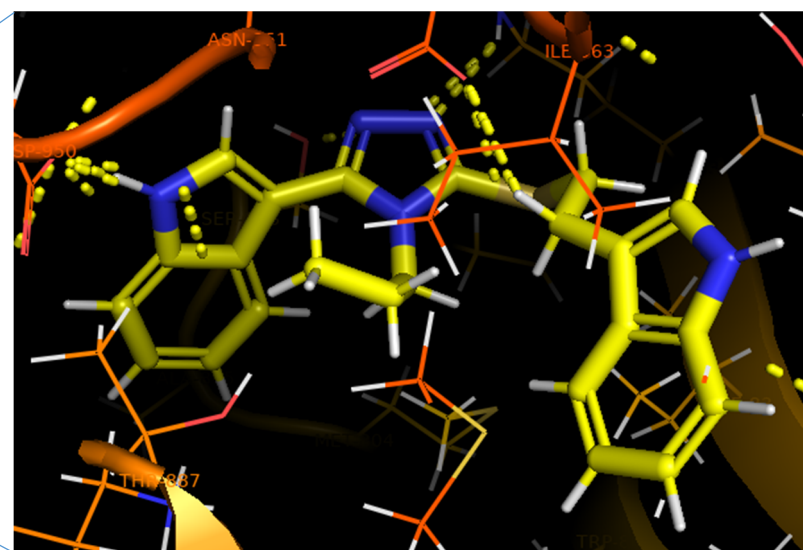



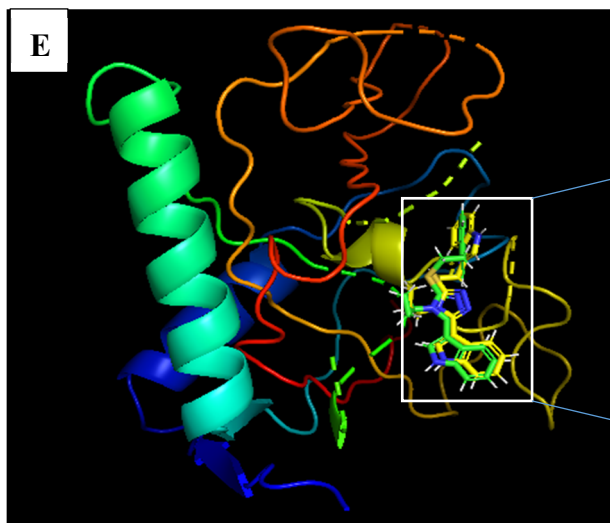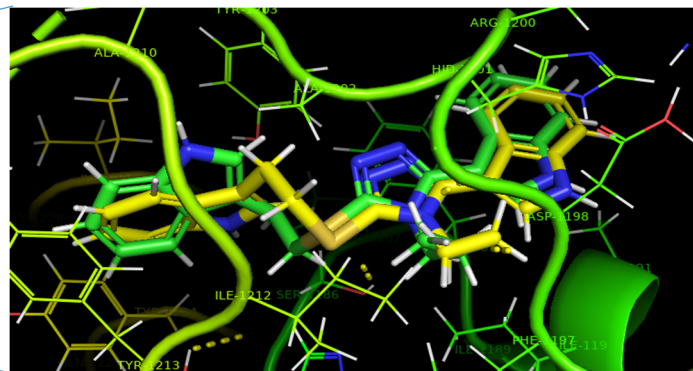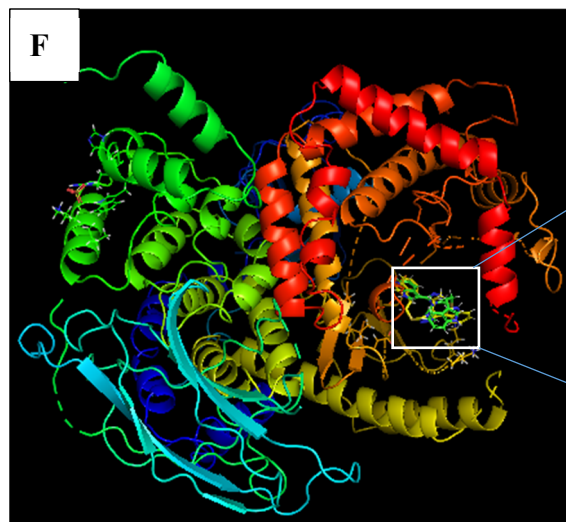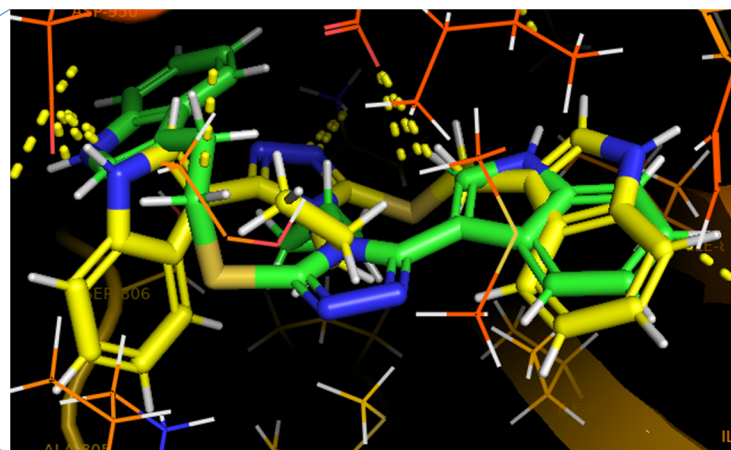

G

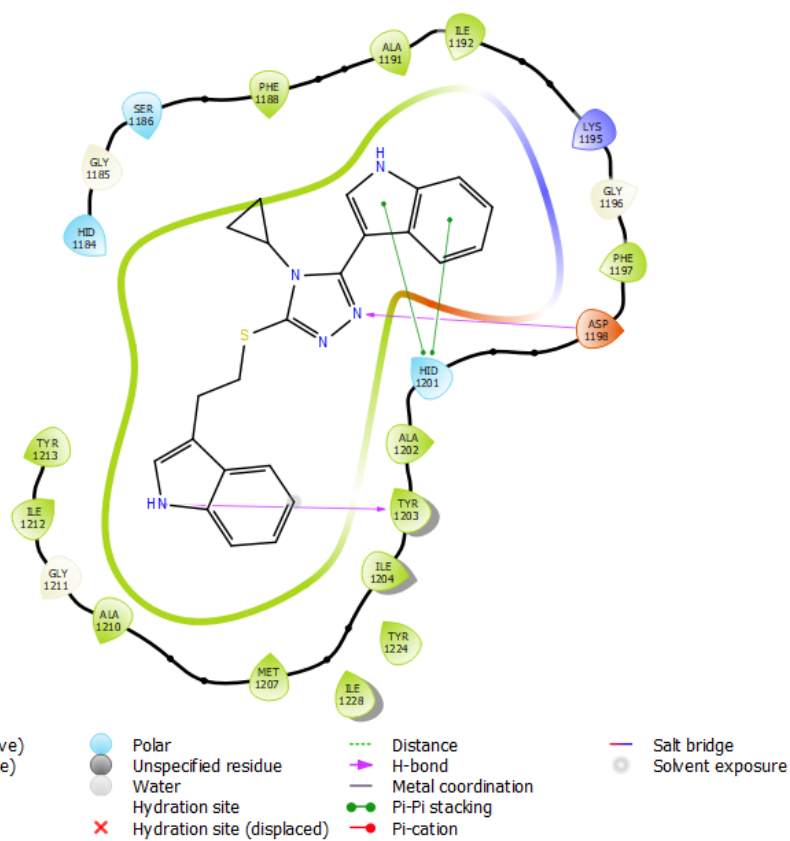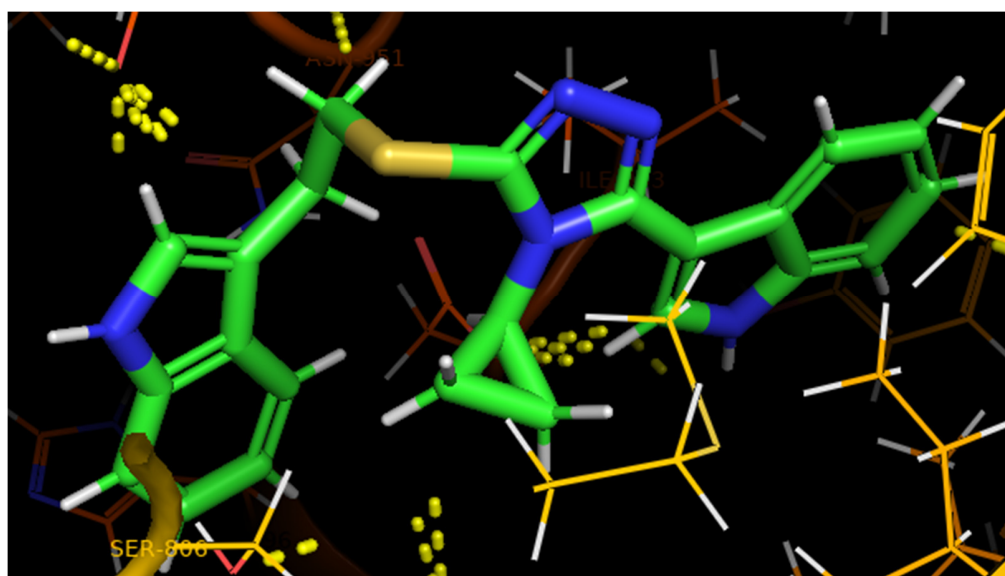

H

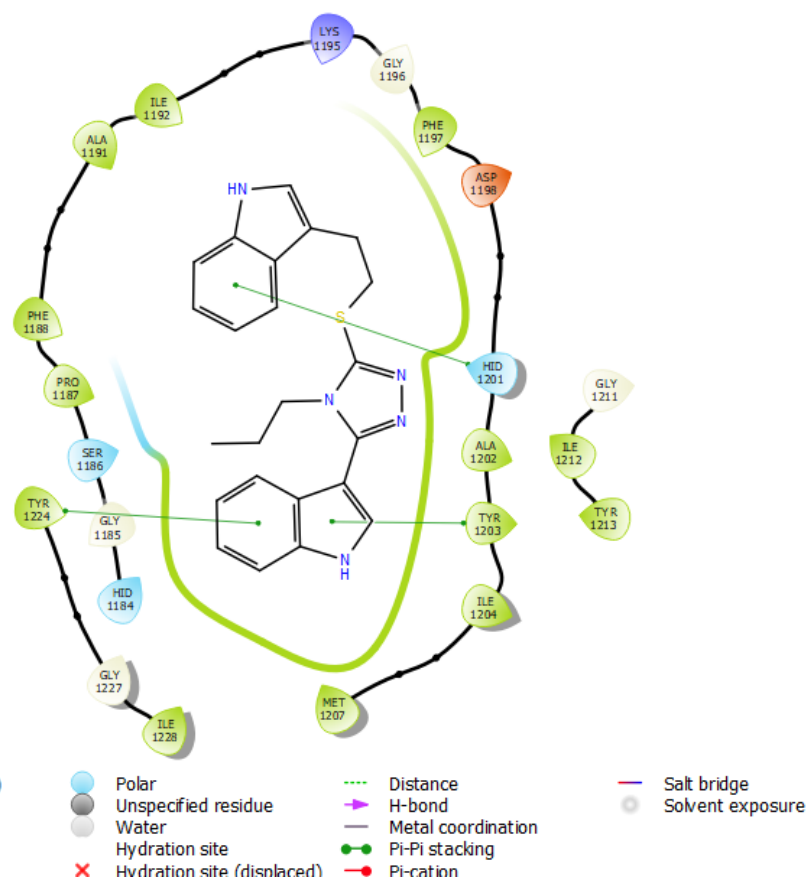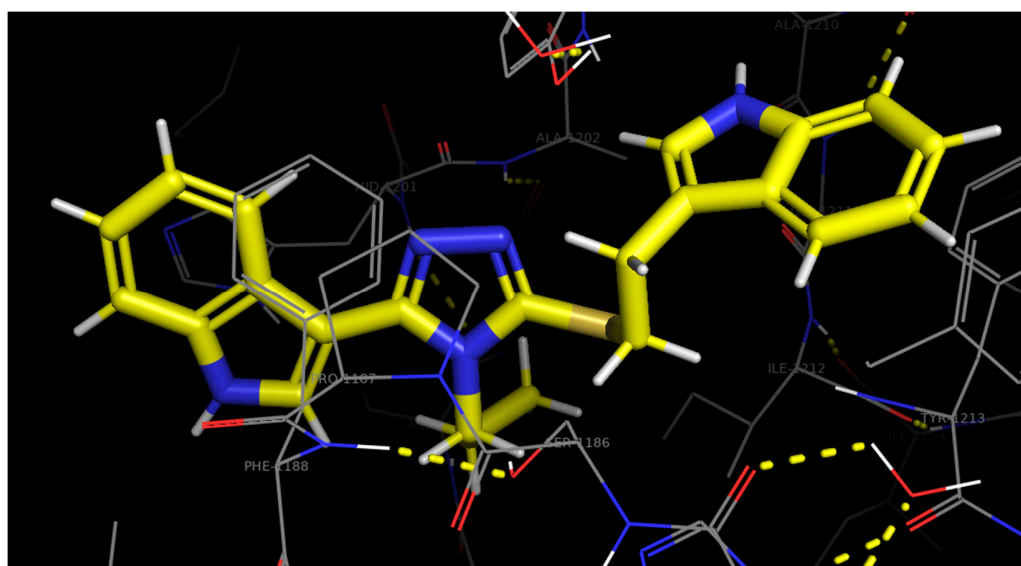

I

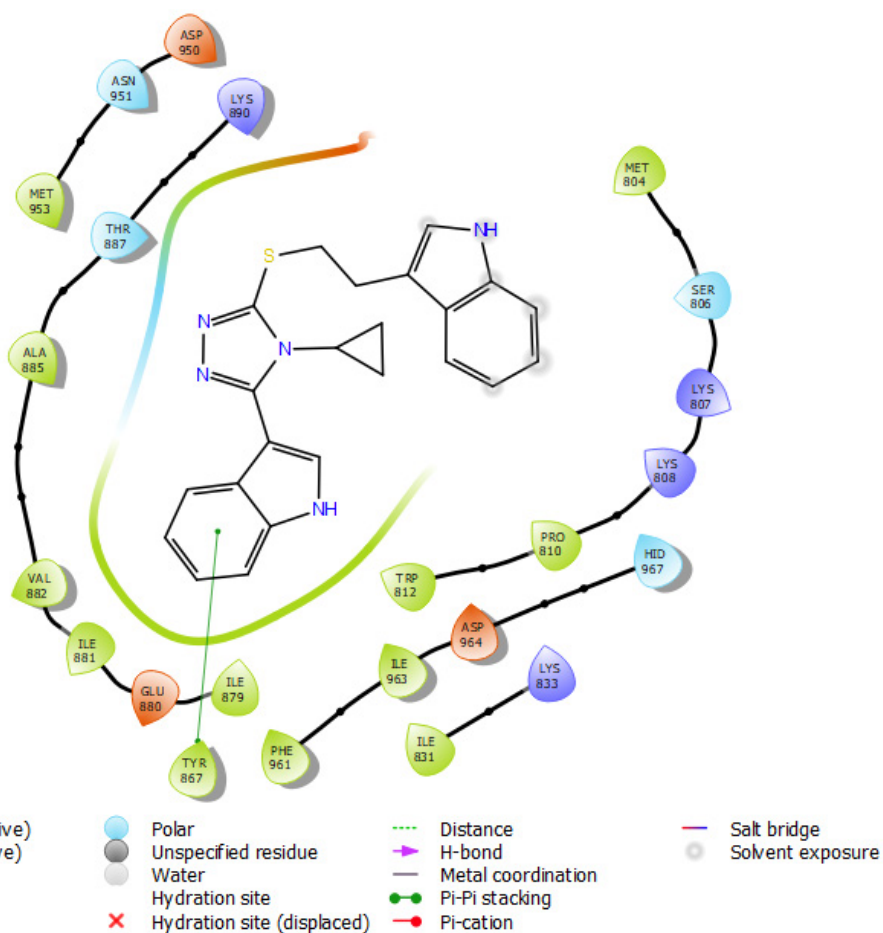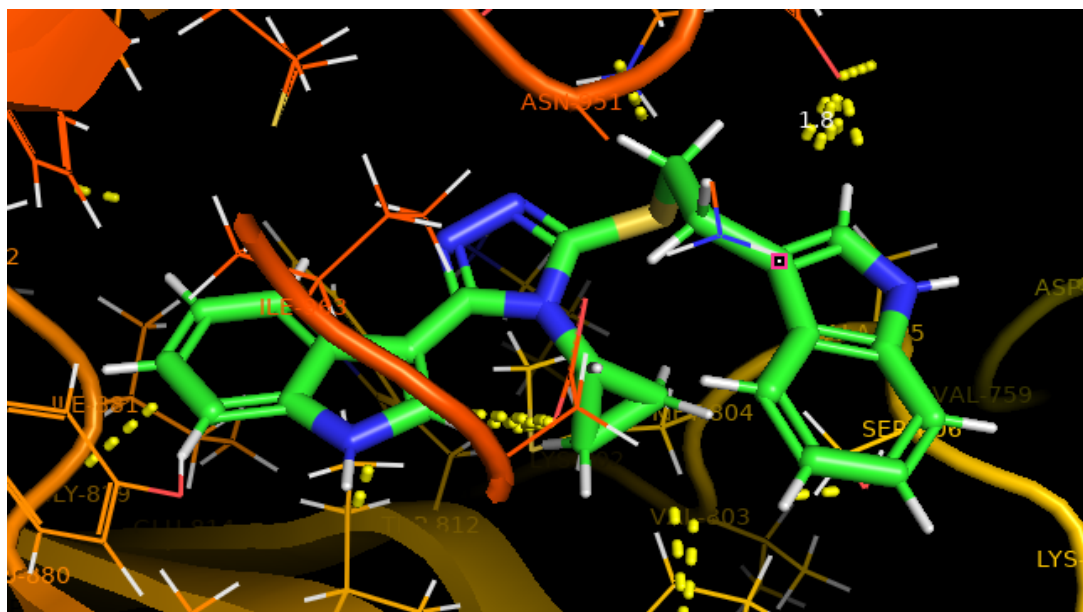

J

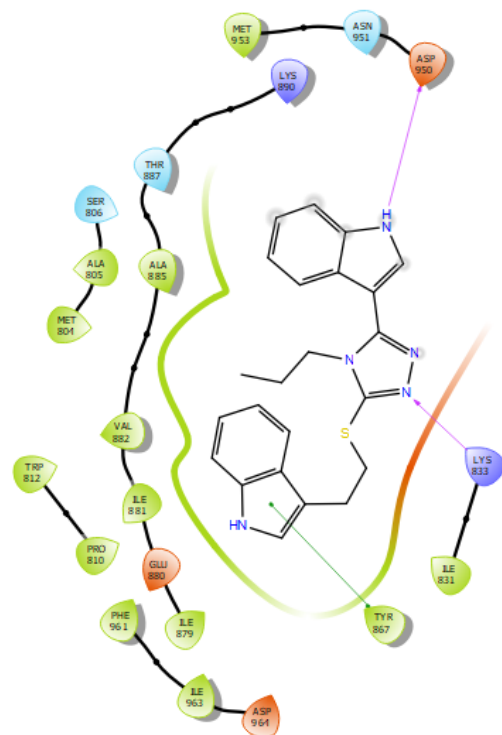

- |                      |                              |                      |                    |
|----------------------|------------------------------|----------------------|--------------------|
| ● Charged (negative) | ● Polar                      | --- Distance         | — Salt bridge      |
| ● Charged (positive) | ● Unspecified residue        | → H-bond             | ○ Solvent exposure |
| ● Glycine            | ● Water                      | — Metal coordination |                    |
| ● Hydrophobic        | ● Hydration site             | ● Pi-Pi stacking     |                    |
| ● Metal              | ✗ Hydration site (displaced) | ● Pi-cation          |                    |

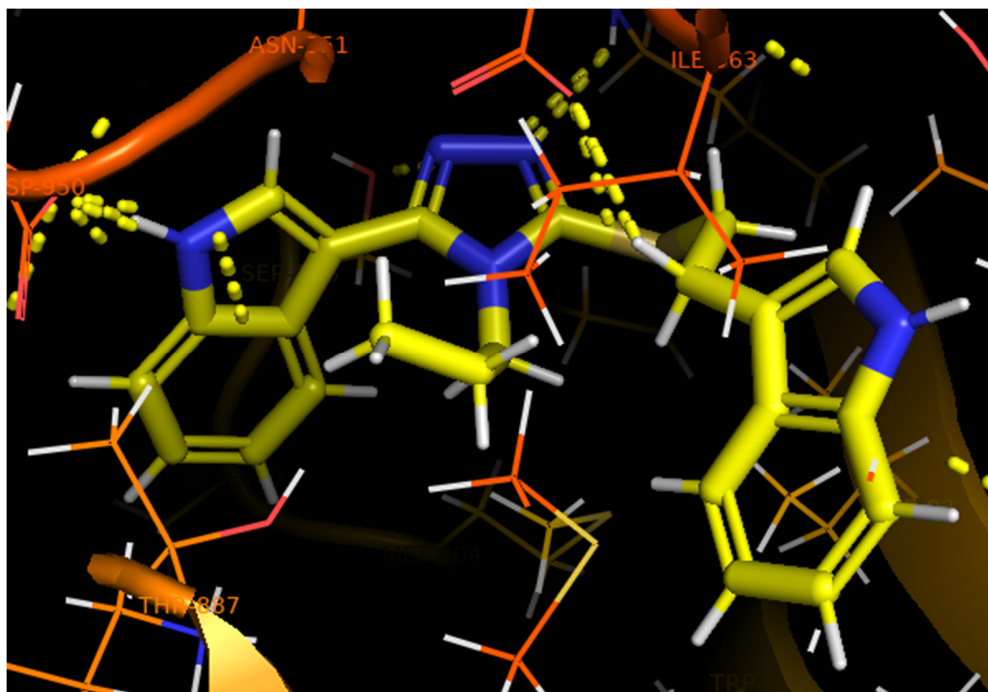

**Figure S2.** (A) Docking pose of 15o in PDB ID 4OA7 is shown in a 3D structure; (B) Docking pose of 15r in PDB ID 4OA7 is shown in a 3D structure. (C) Docking pose of 15r in PDB ID 3L54 is shown in a 3D structure; (D) Docking pose of 15o in PDB ID 3L54 is shown in a 3D structure. (E) Docking pose of 15o & 15r in PDB ID 4OA7 is shown in a 3D structure; (F) Docking pose of 15o & 15r in PDB ID 3L54 is shown in a 3D structure. (G) Docking pose of **15r** in PDB ID 4OA7 is shown in a 2D structure where indole NH bind with TYR 1203 *via* H-bonding is represented by pink arrow line similarly triazole N was formed with ASP 1198. On the other hand, the indole was shown a Pi-Pi staking with HID 1201 represented by a green line; (H) Docking pose of **15o** in PDB ID 4OA7 are shown in a 2D structure where both indoles was shown a Pi-Pi staking with HID 1201, TYR 1203, and TYR 1224 represented by green line; (I) Docking pose of **15r** in PDB ID 3L54 is shown in a 2D structure where indole was shown Pi-Pi staking with TYR 867 represented by green line; (J) Docking pose of **15o** in PDB ID 3L54 is shown in a 2D structure where indole NH and triazole N bind with LYS 833 and ASP 950 respectively *via* H-bonding is represented by pink arrow line. On the other hand, indole was shown Pi-Pi staking with TYR 867 represented by the green line.

1  
 PROTON DMSO {D:\data\SCMM} nmrsu 1

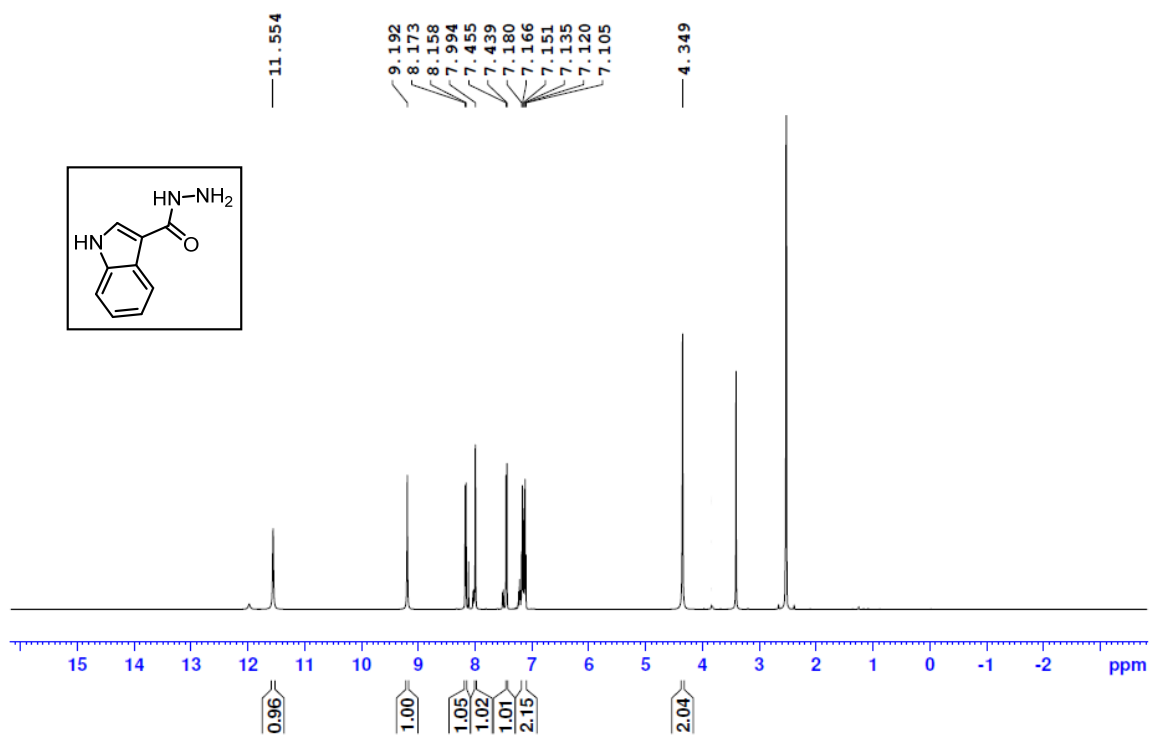

2  
 PROTON DMSO {D:\data\SCMM} nmrsu 2

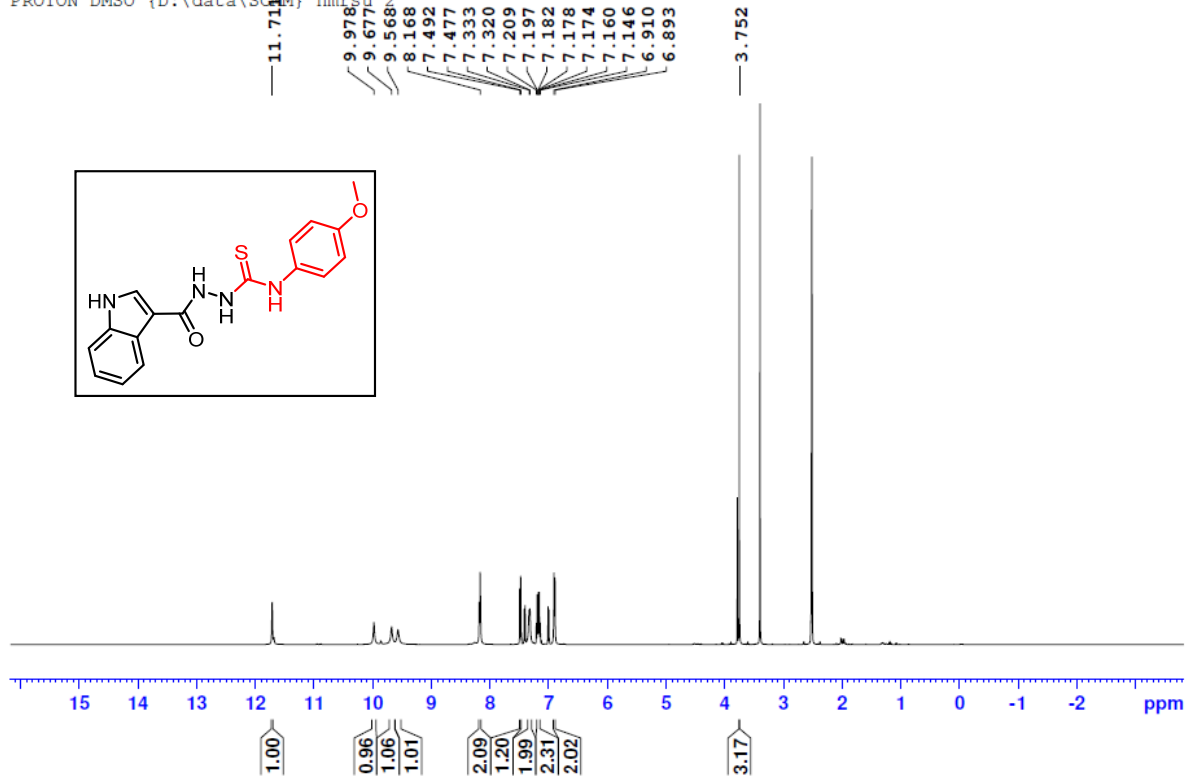

3  
 PROTON DMSO {D:\data\SCMM} nmrsu 3

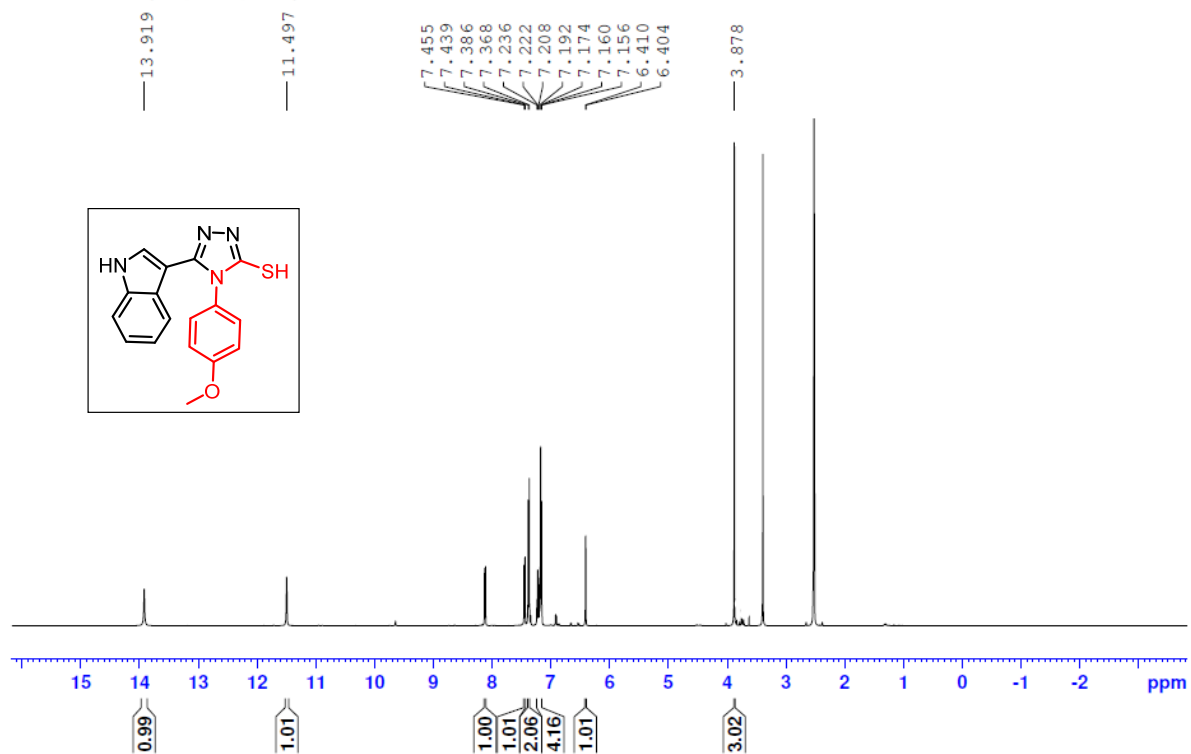



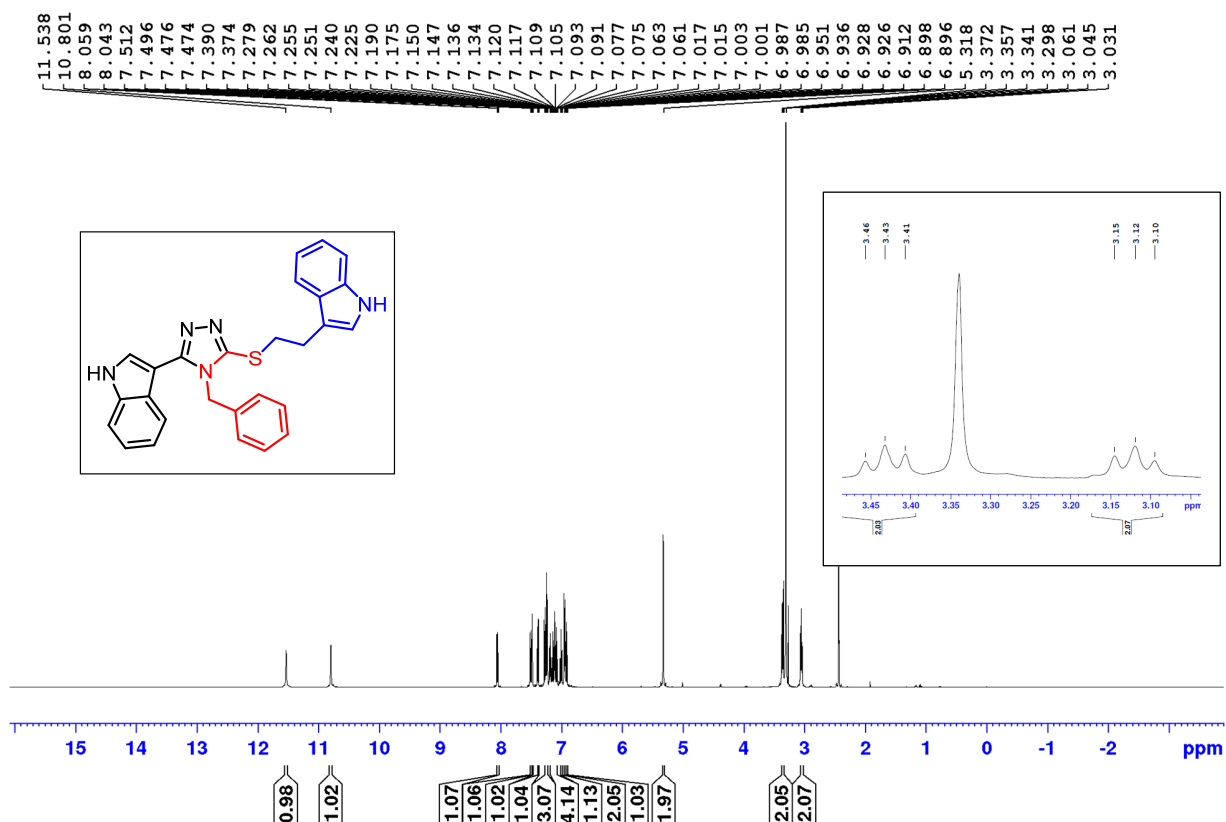

AY-34

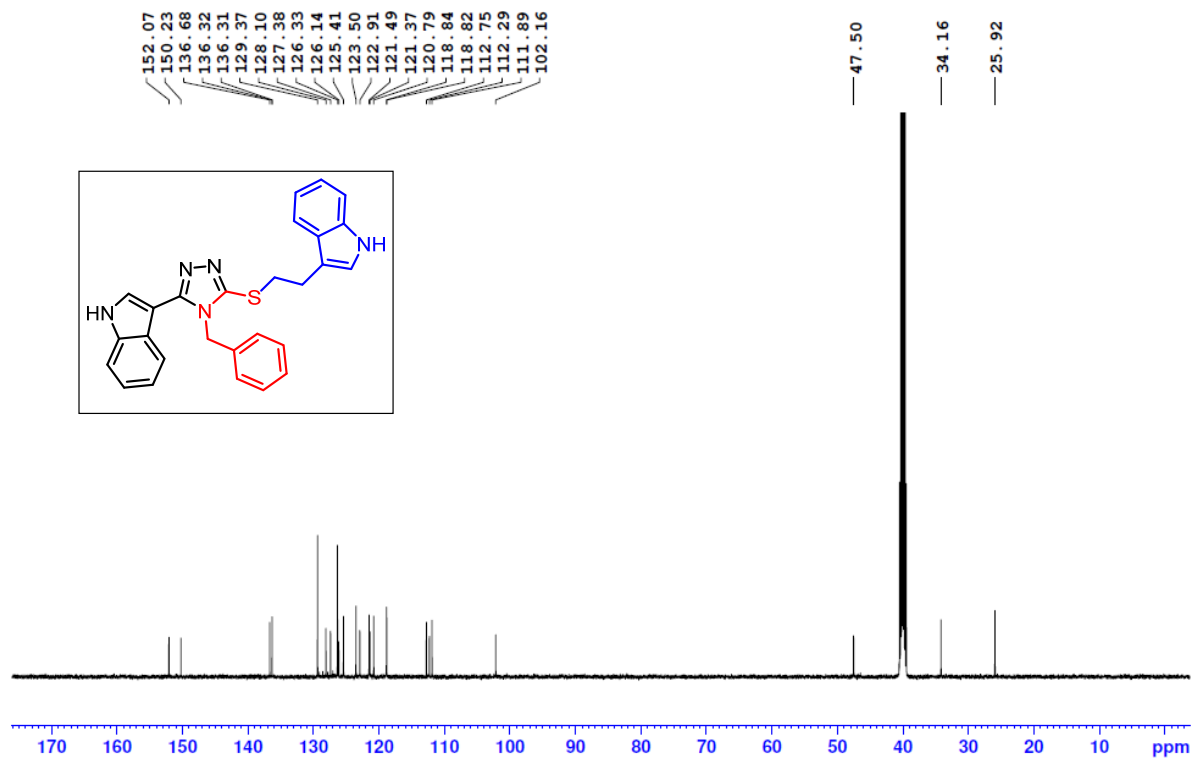

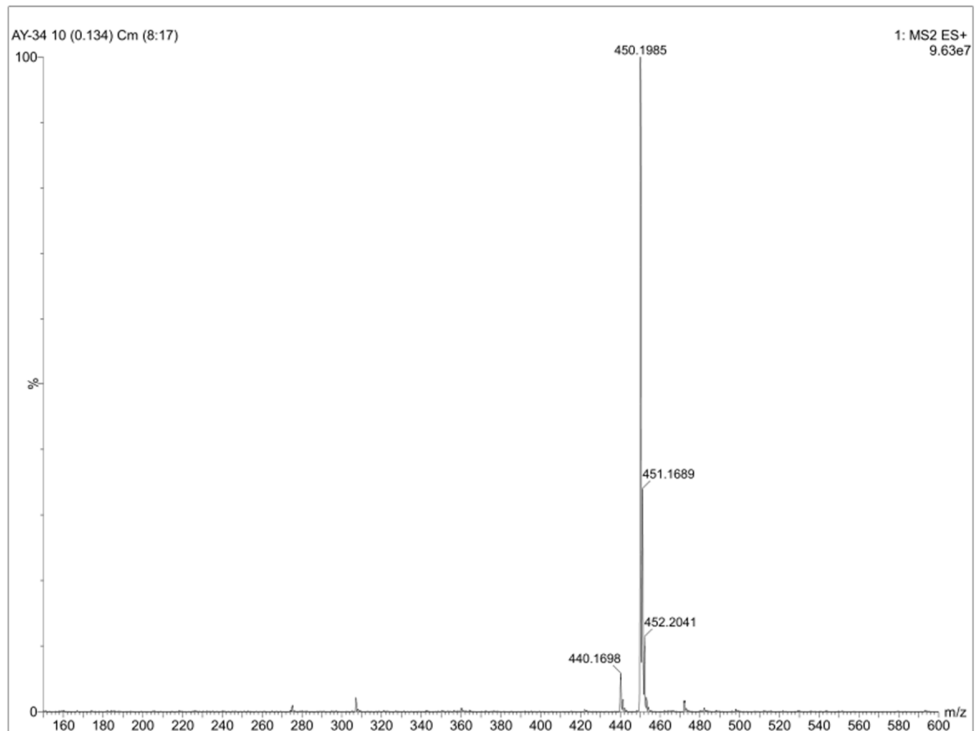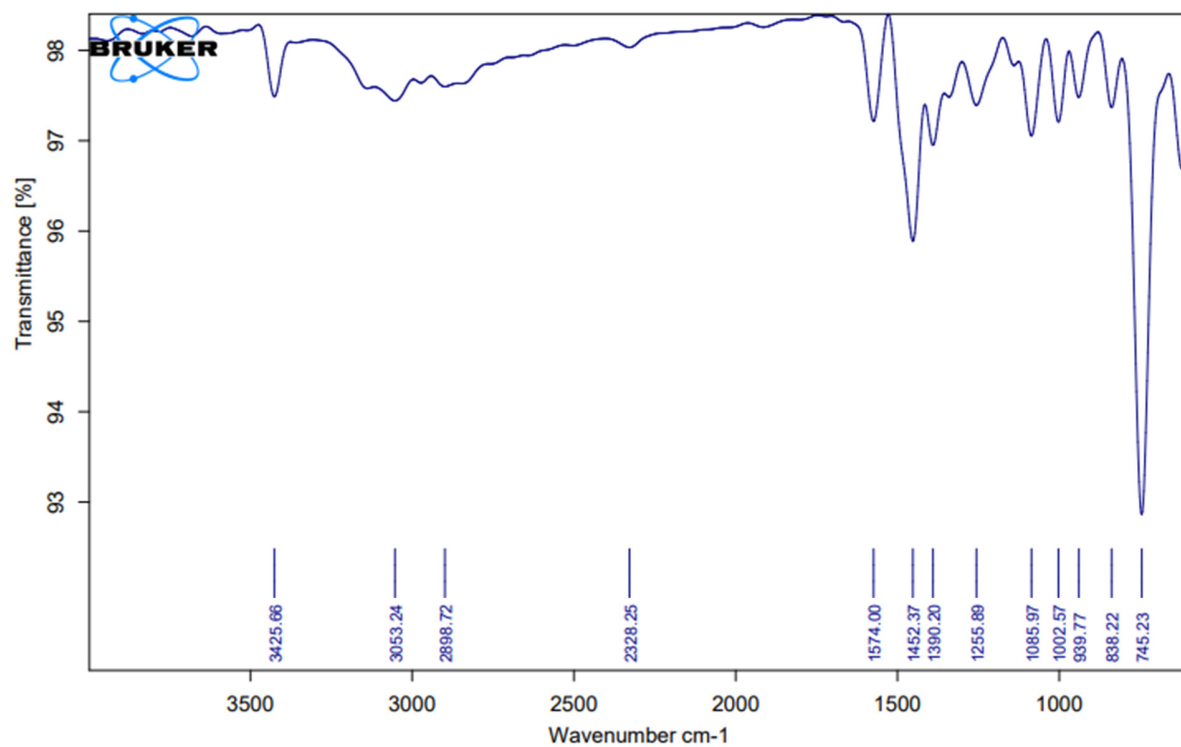

C:\Users\NIPERG\Desktop\Daya\AY\AY-66.0

AY-34

Instrument type and / or accessory

31-10-2022

AY-33

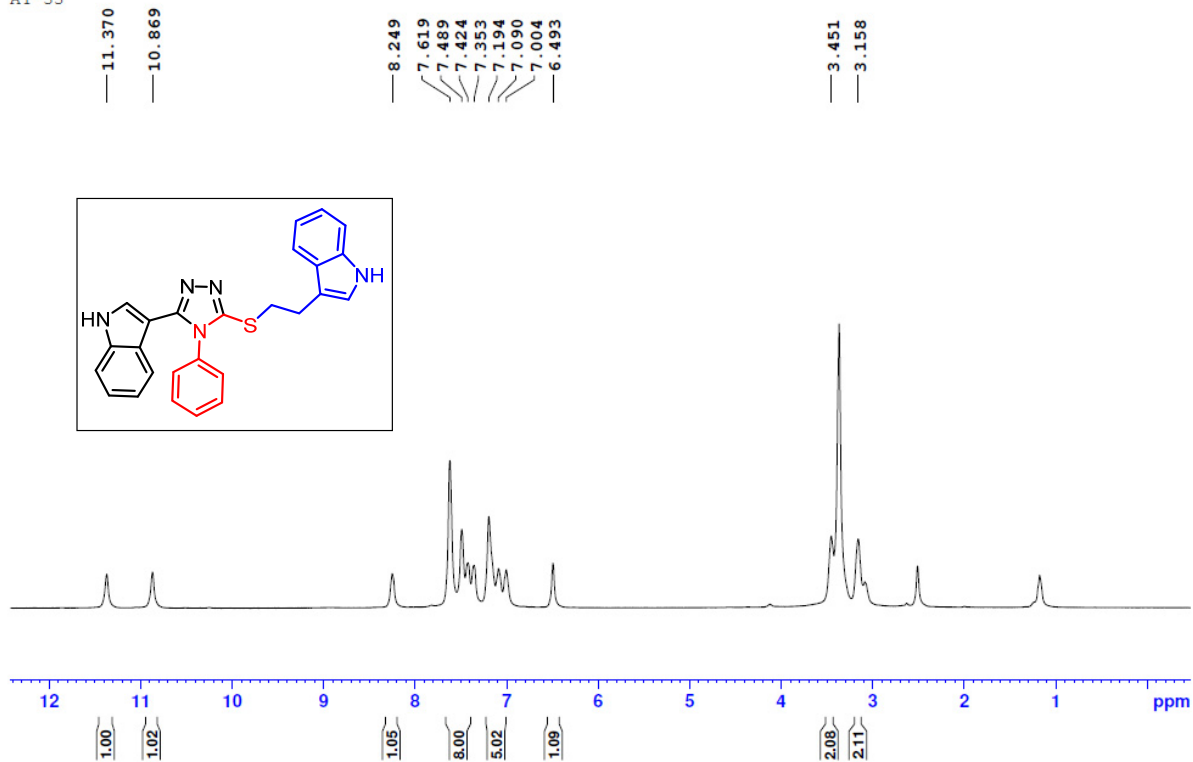

AY-33

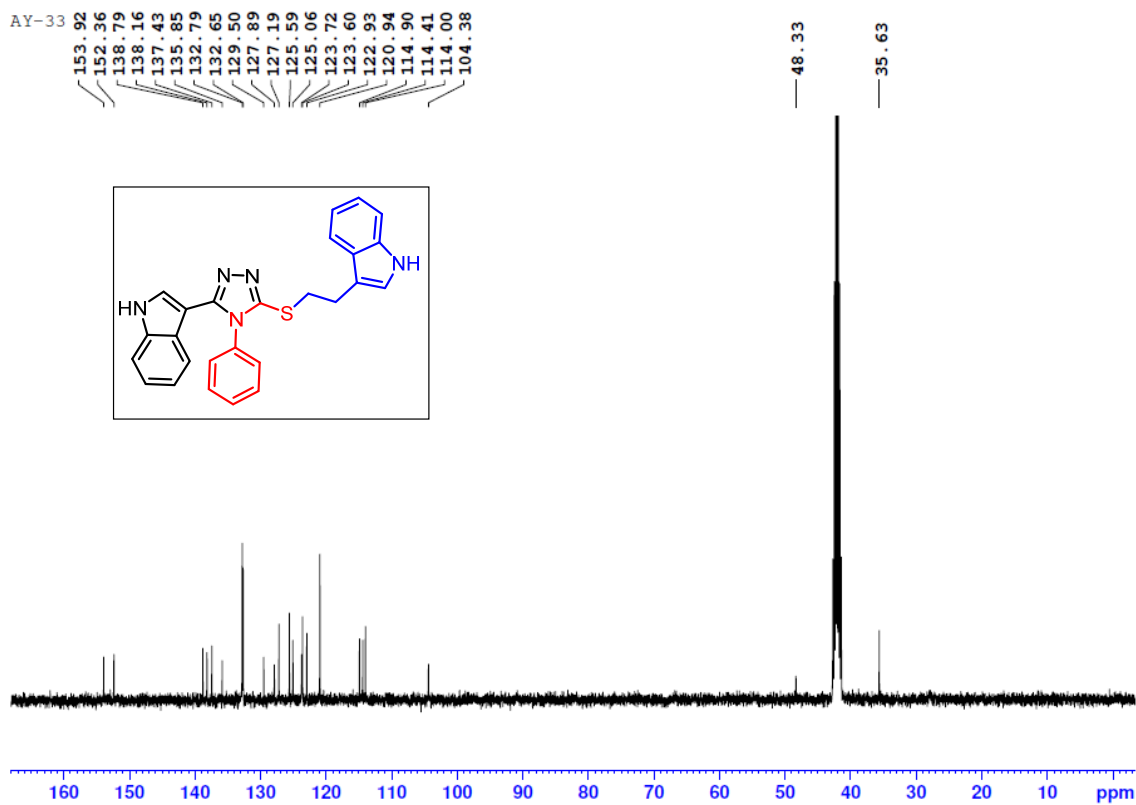

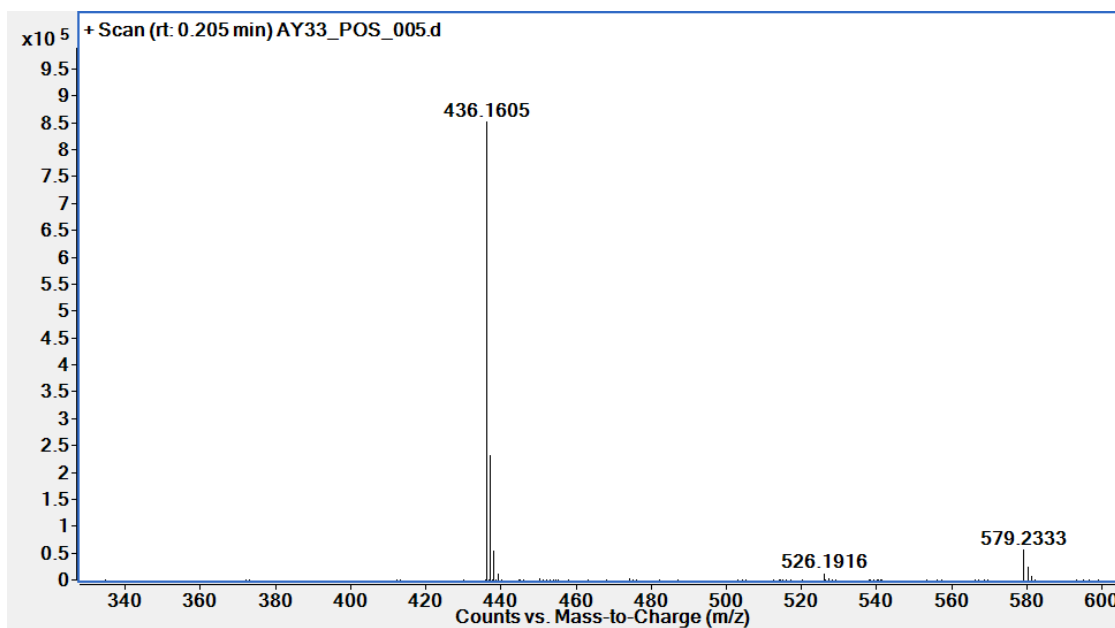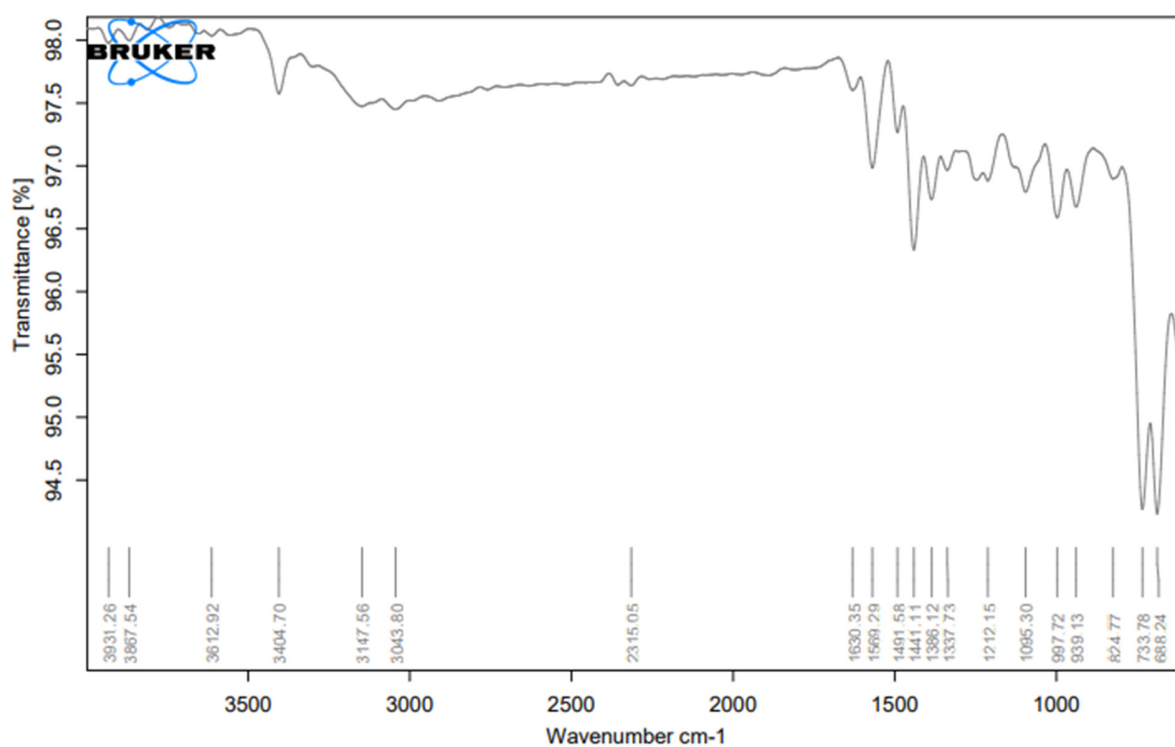

C:\Users\WIPERG\Desktop\Daya\AY\AY-33.0

AY-33

Instrument type and / or accessory

01-11-2022

AY-55

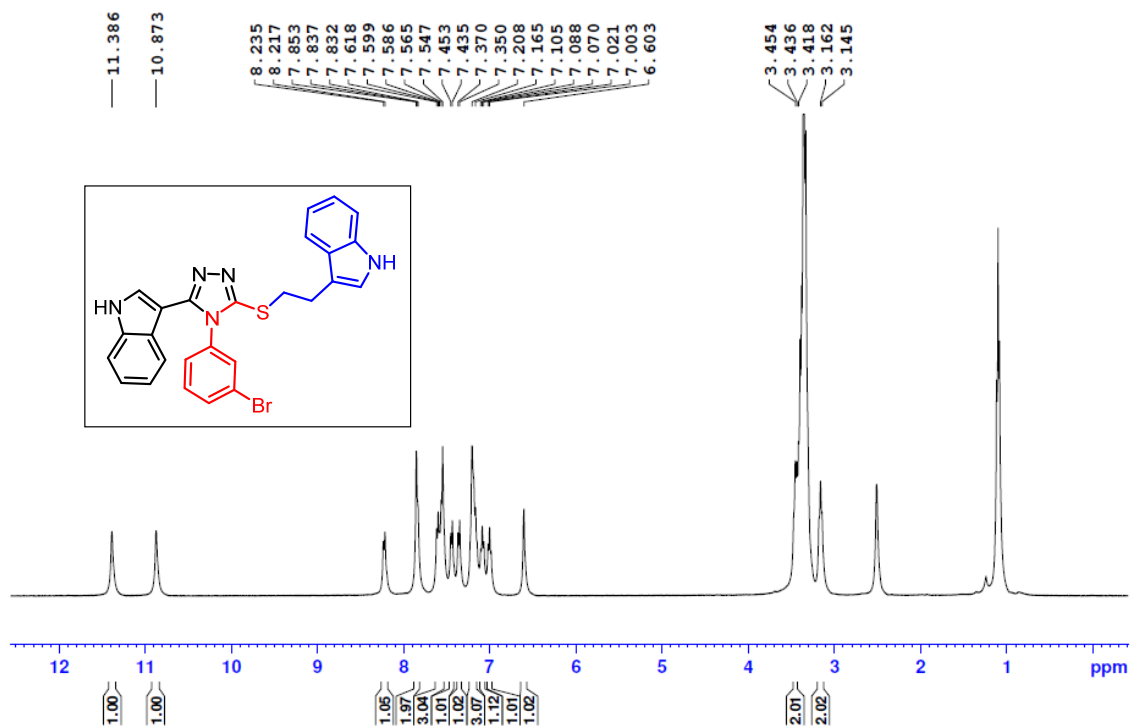

AY-55

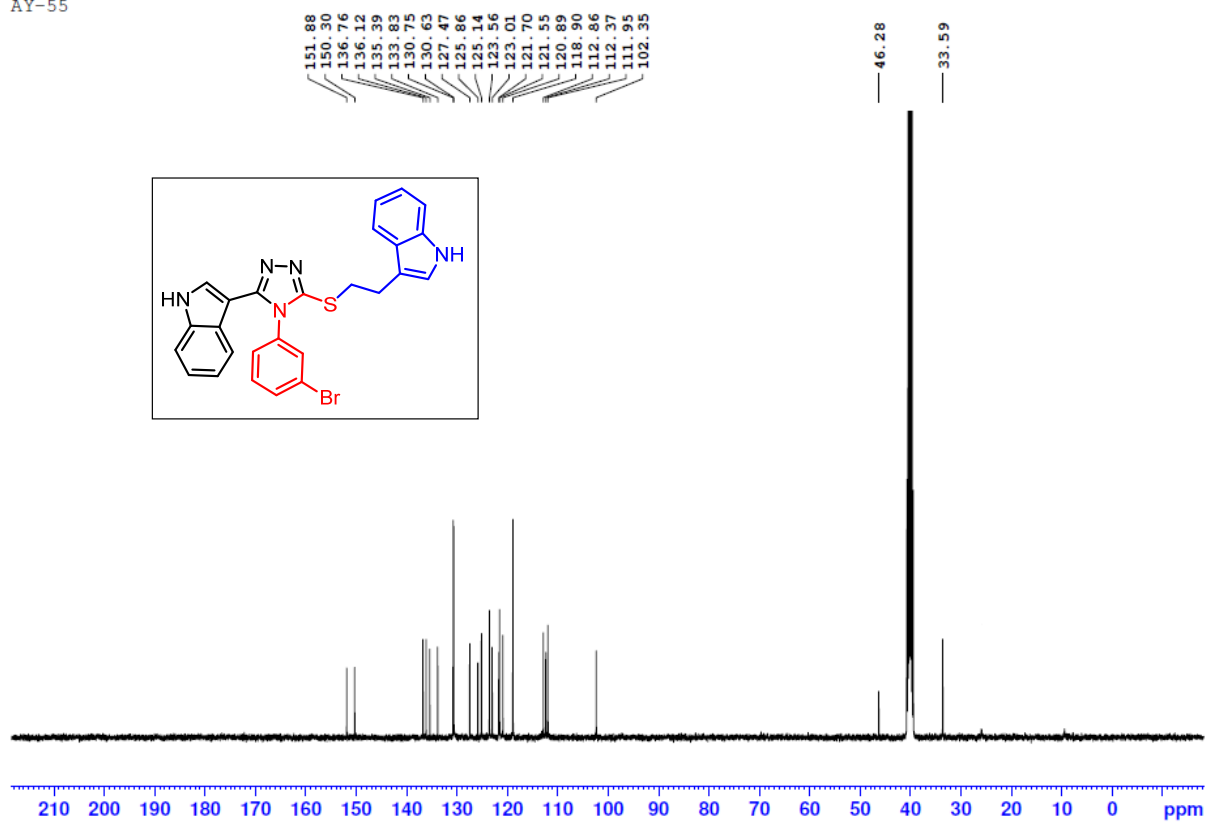

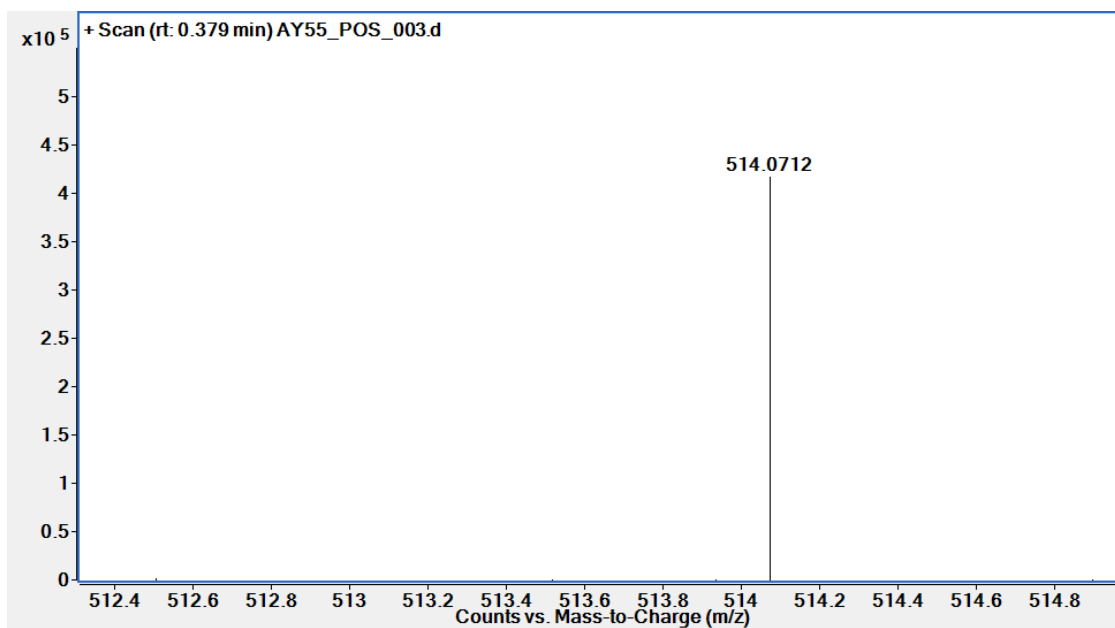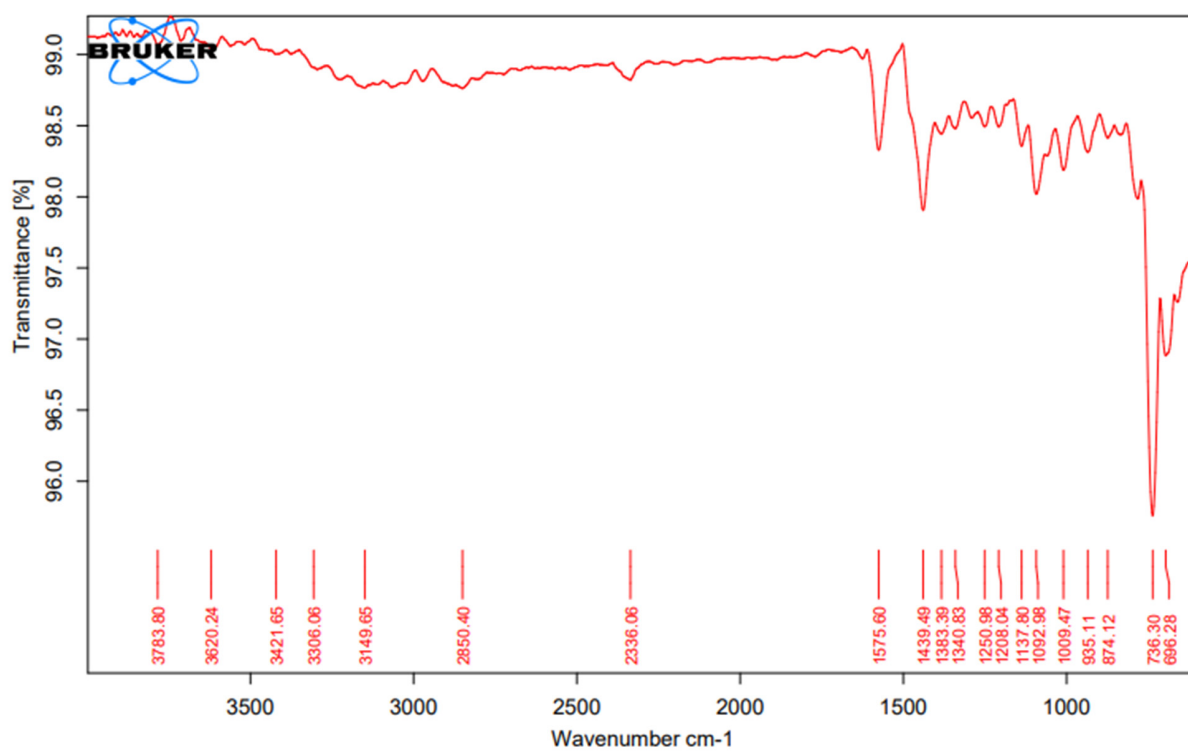

C:\Users\NIPERG\Desktop\Daya\AY\AY-55.0

AY-55

Instrument type and / or accessory

31-10-2022

A4-159

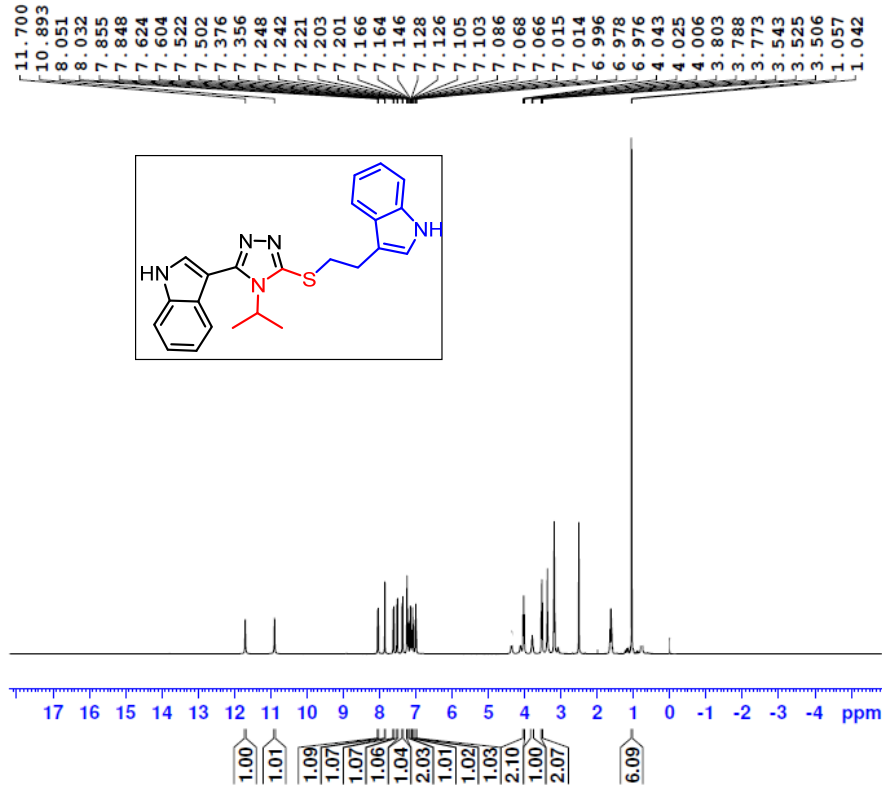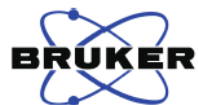

Current Data Parameters  
NAME AY-159  
EXPNO 1  
PROCNO 1

F2 - Acquisition Parameters  
Date\_ 20201231  
Time 16.12  
INSTRUM spect  
PROBHD 5 mm PABBO BB/  
PULPROG zg30  
TD 65536  
SOLVENT DMSO  
NS 8  
DS 0  
SWH 9615.385 Hz  
FIDRES 0.146719 Hz  
AQ 3.4078720 sec  
RG 58.68  
DW 52.000 usec  
DE 6.50 usec  
TE 300.0 K  
D1 1.00000000 sec  
TD0 1

CHANNEL f1  
SFO1 400.1629712 MHz  
NUC1 1H  
P1 13.20 usec  
PLW1 13.00000000 W

F2 - Processing parameters  
SI 65536  
SF 400.1605016 MHz  
WDW EM  
SSB 0  
LB 0.30 Hz  
GB 0  
PC 1.00

AY-159

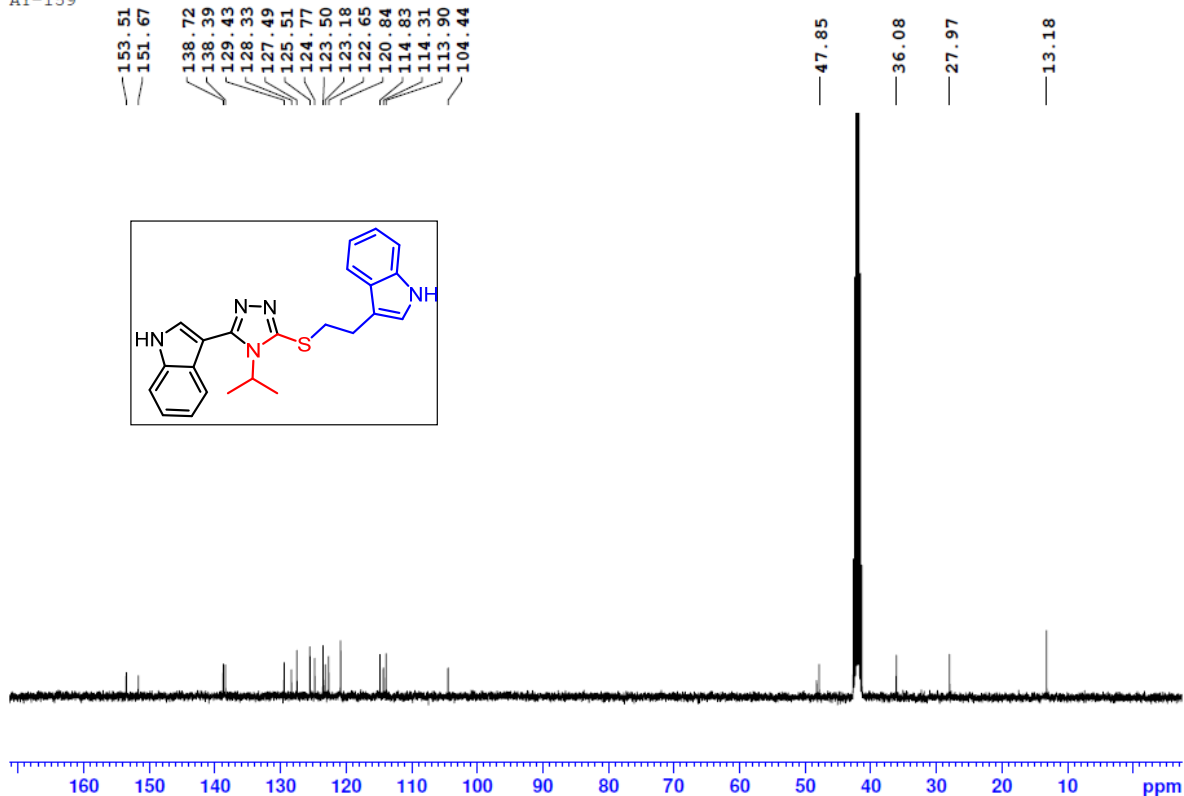

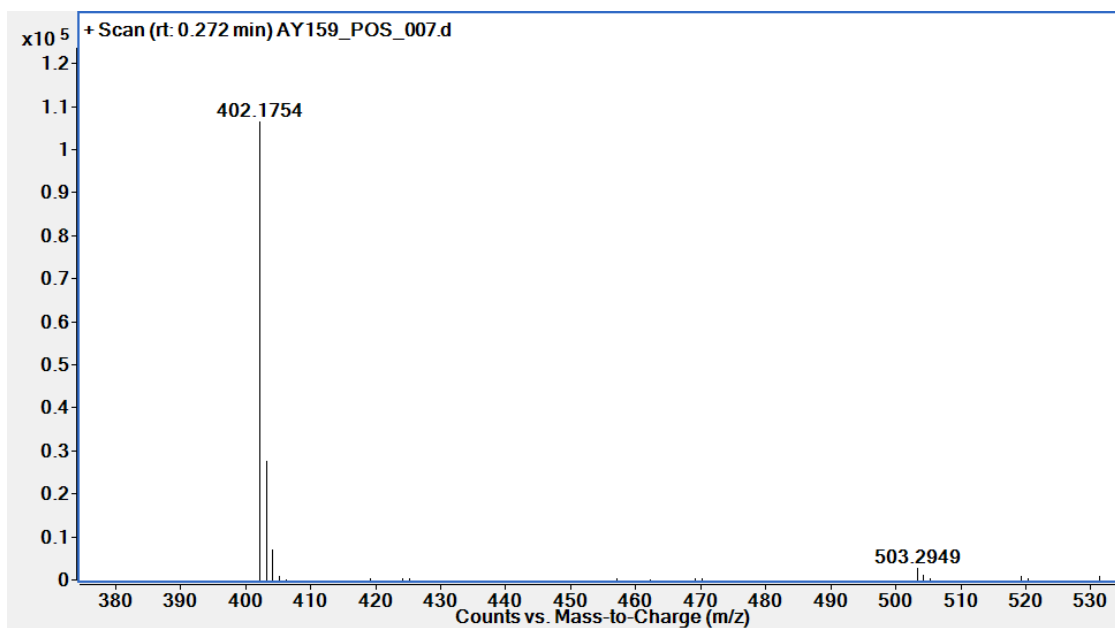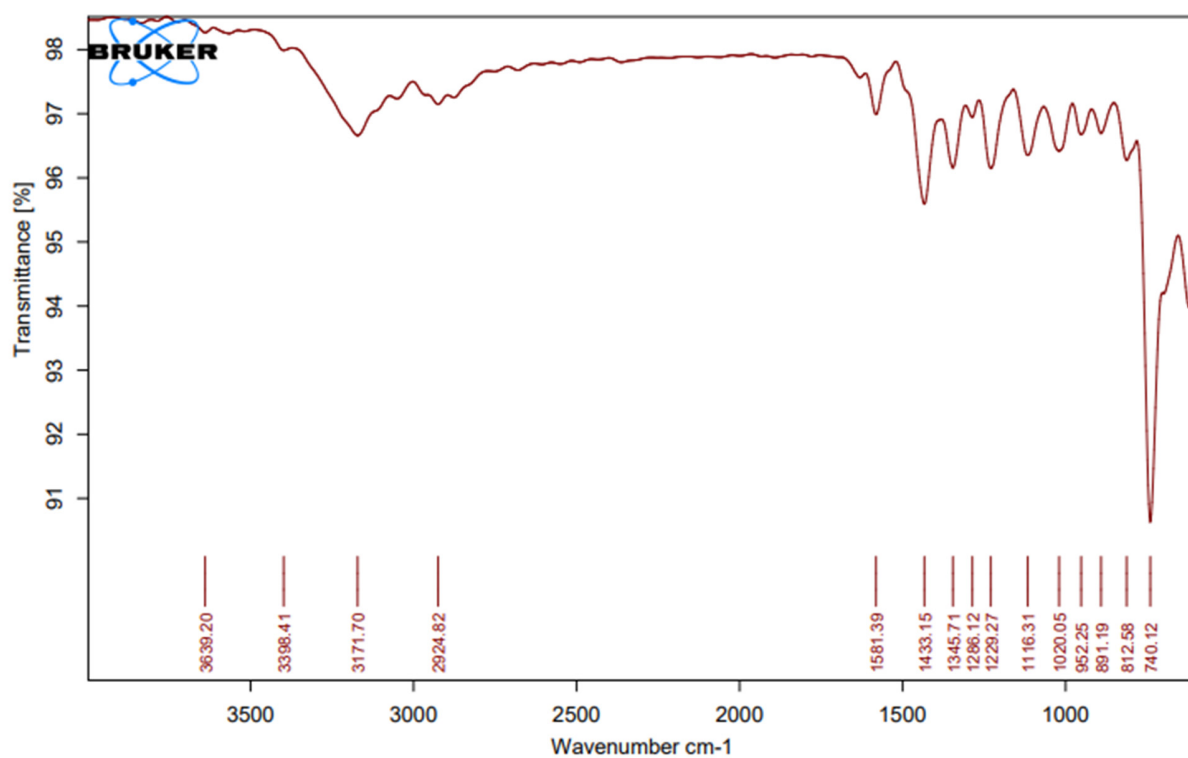

C:\Users\NIPERG\Desktop\Daya\AY\AY-159.0

AY-159

Instrument type and / or accessory

01-11-2022



AY-57

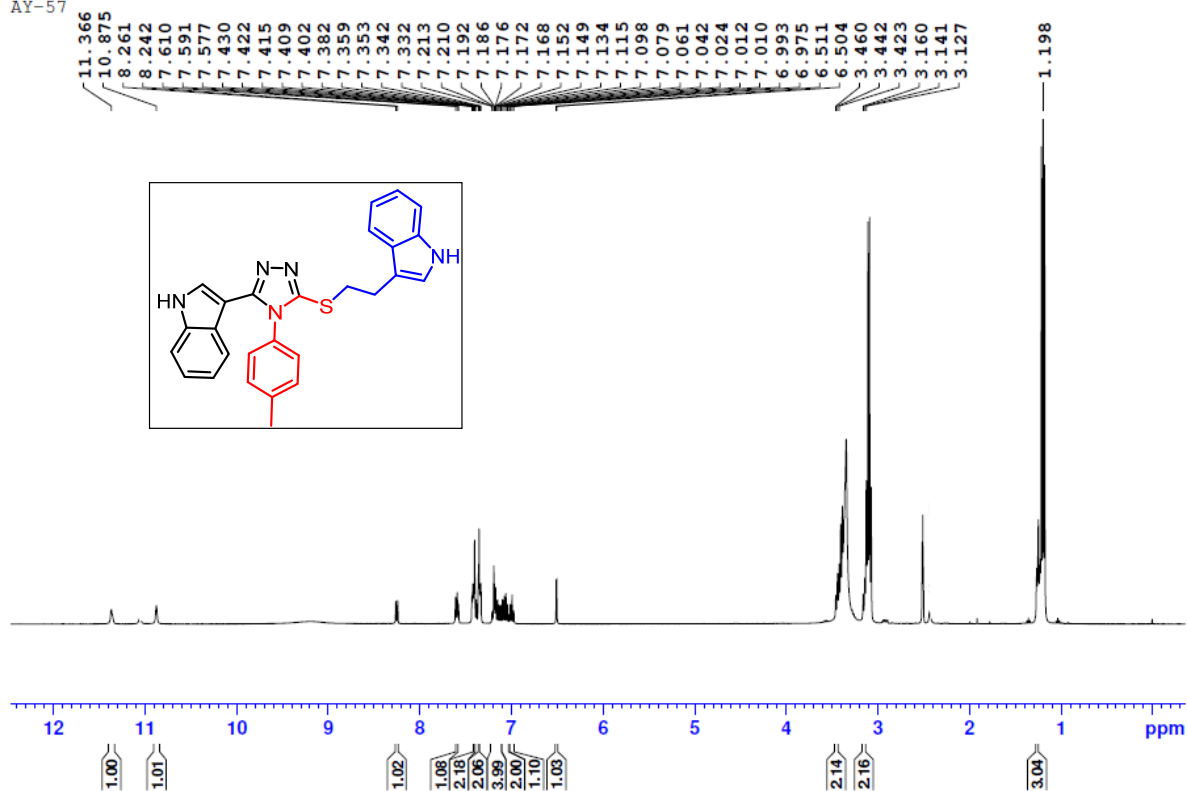

AY-57

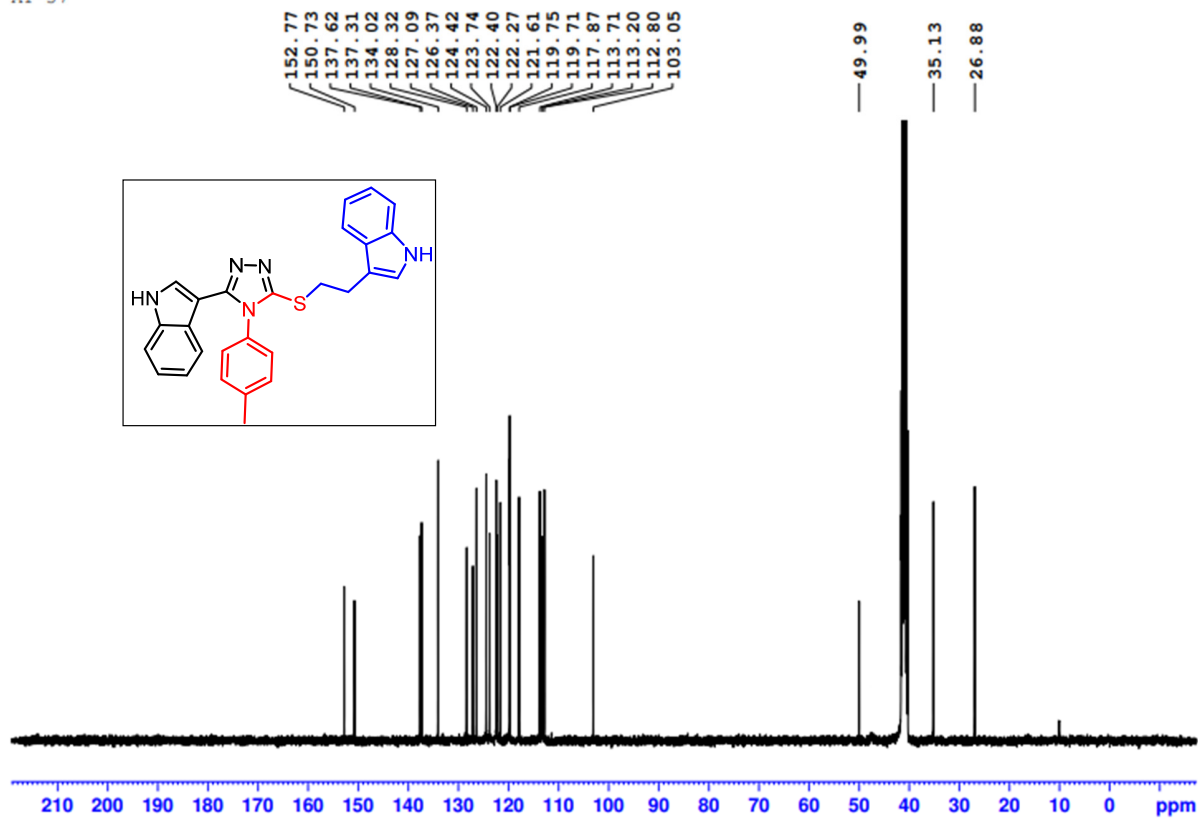

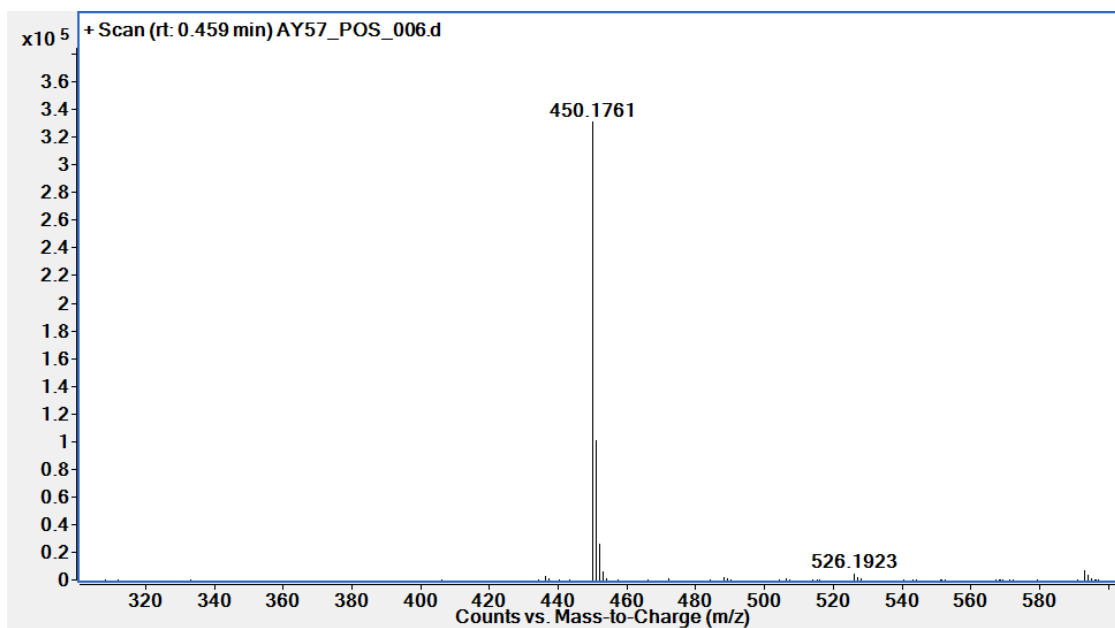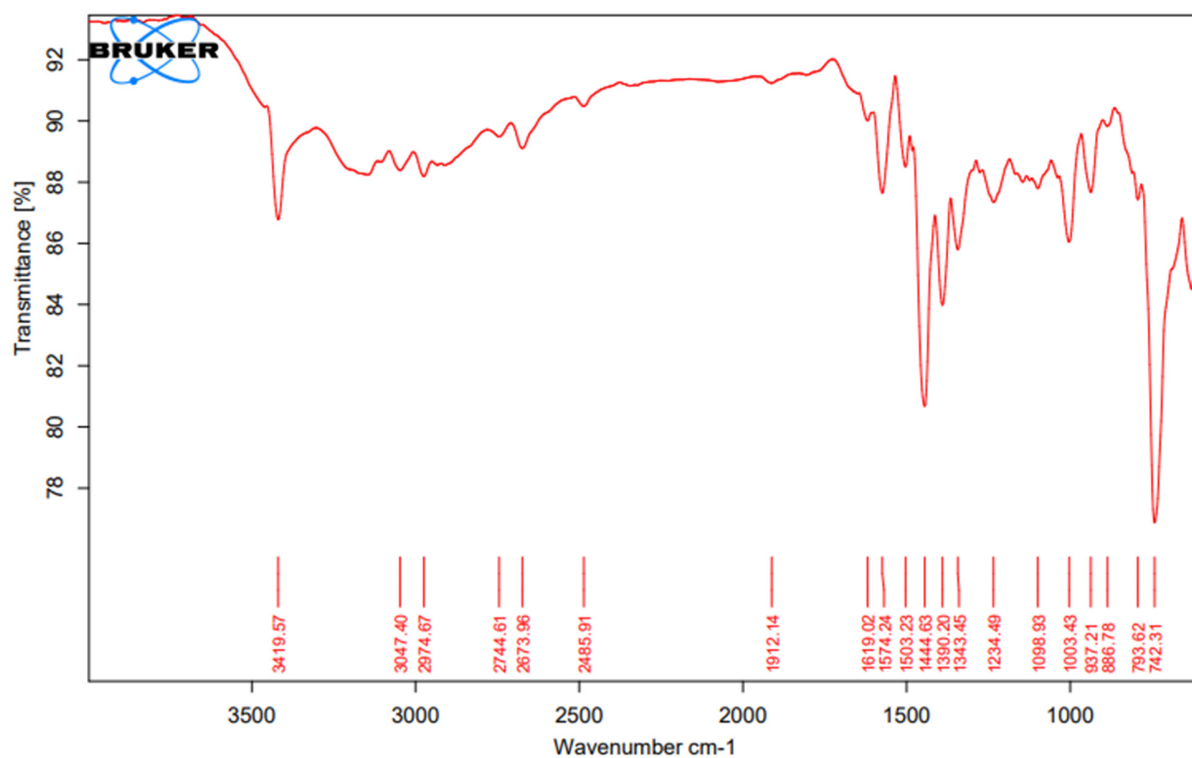

C:\Users\NIPERG\Desktop\Daya\AY\AY-57.0

AY-57

Instrument type and / or accessory

01-11-2022

A4-140

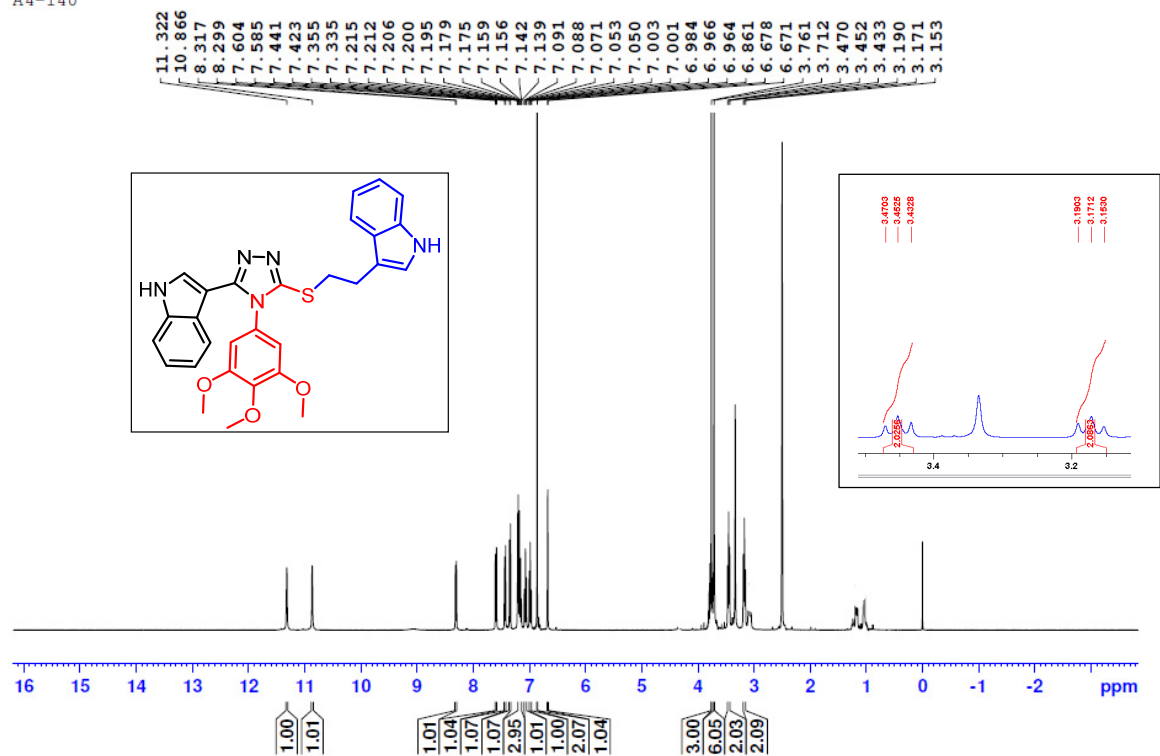

A4-140

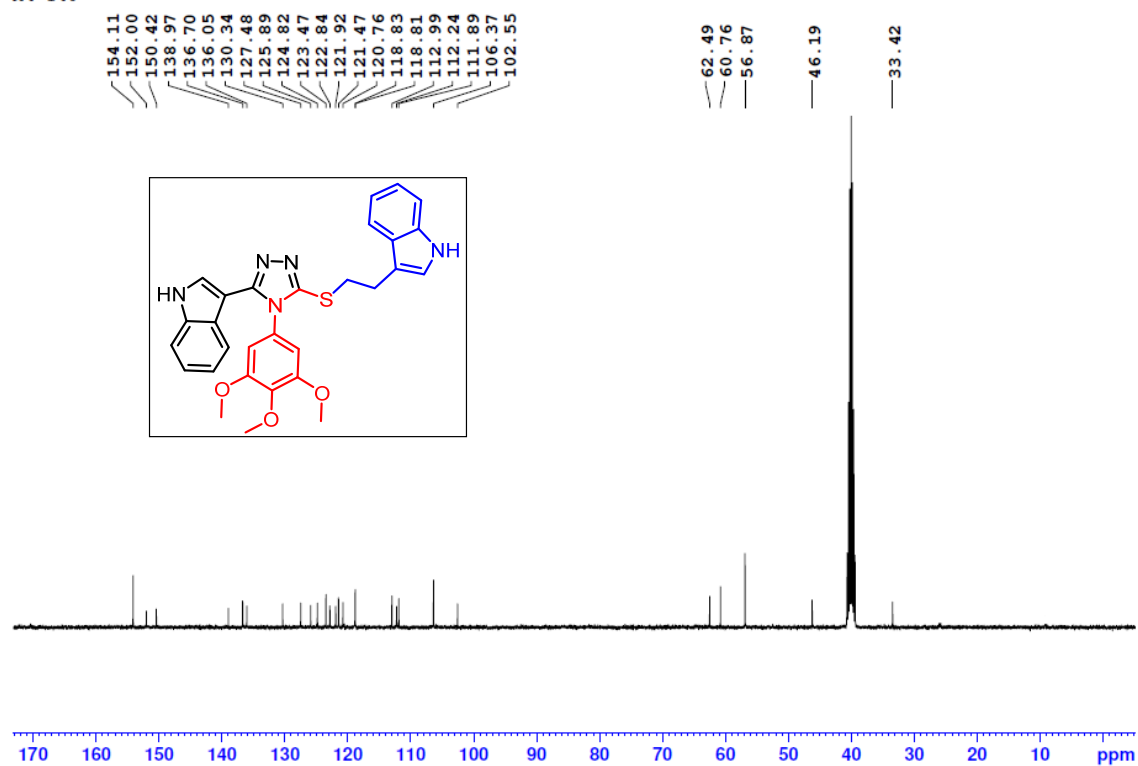

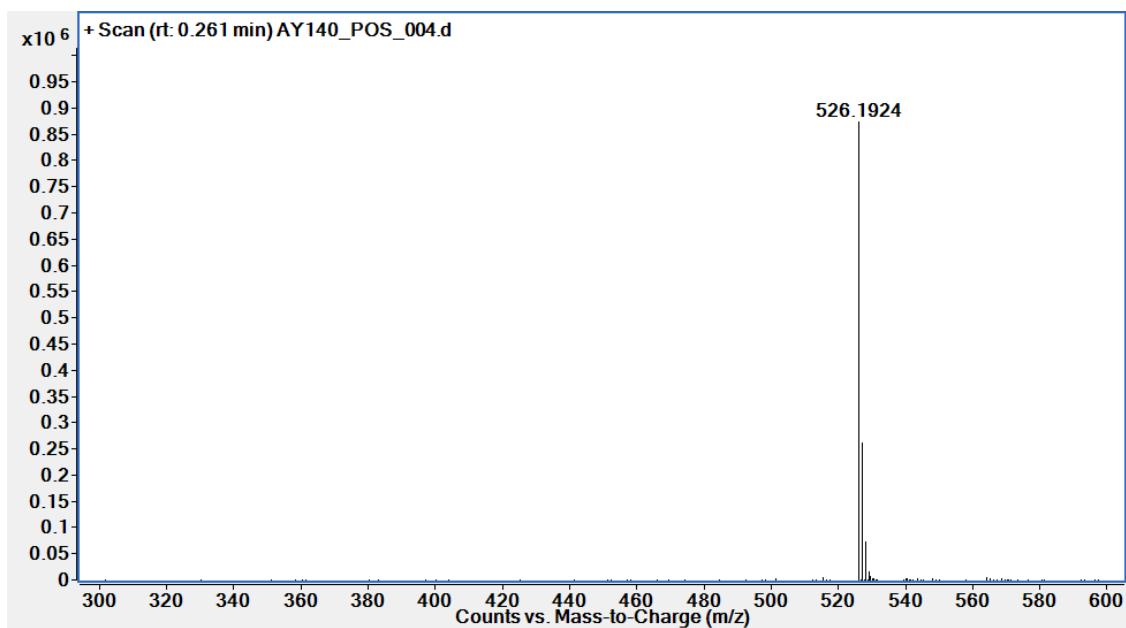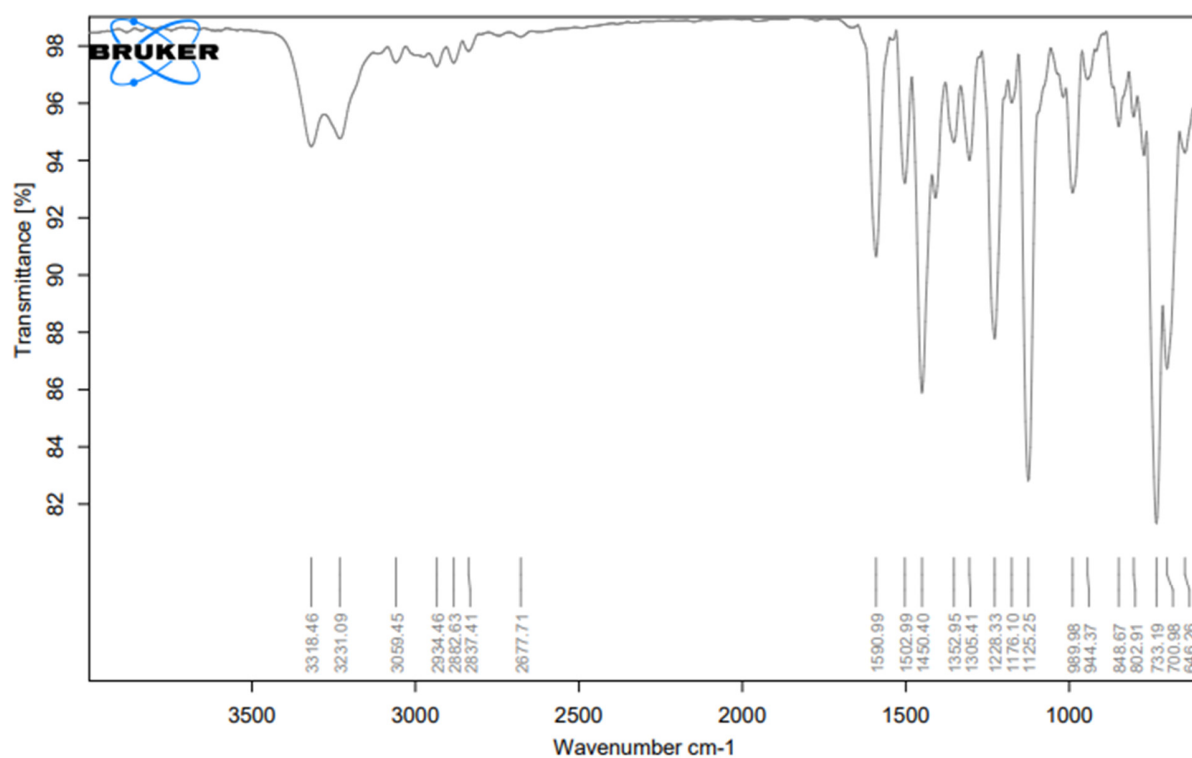

|                                           |        |                                    |            |
|-------------------------------------------|--------|------------------------------------|------------|
| C:\Users\NIPERG\Desktop\Dayal\AY\AY-140.0 | AY-140 | Instrument type and / or accessory | 01-11-2022 |
|-------------------------------------------|--------|------------------------------------|------------|

AY-66

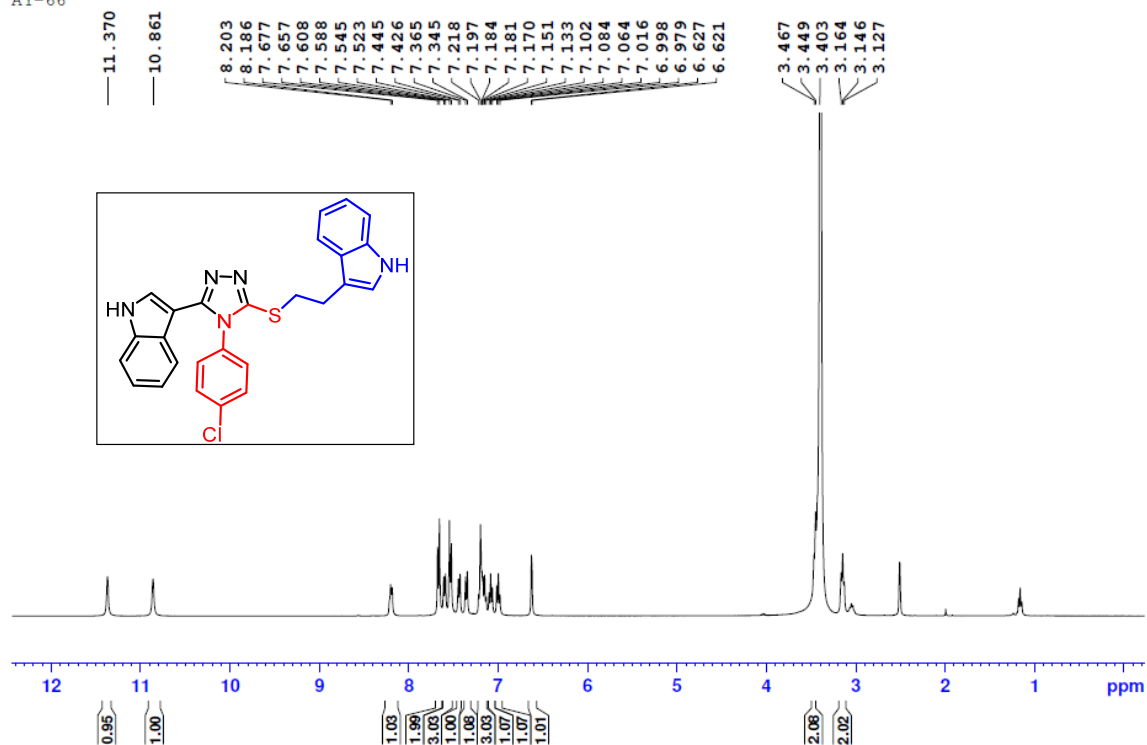

AY-66

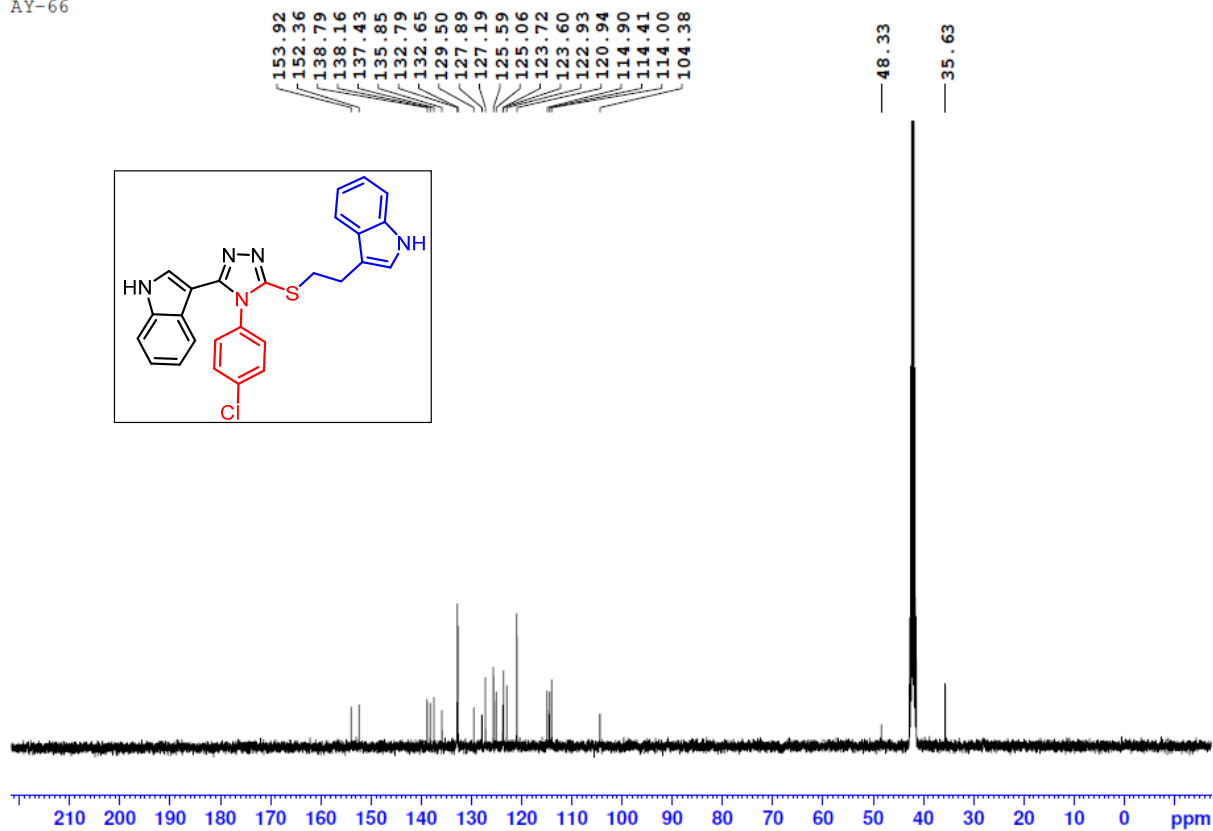

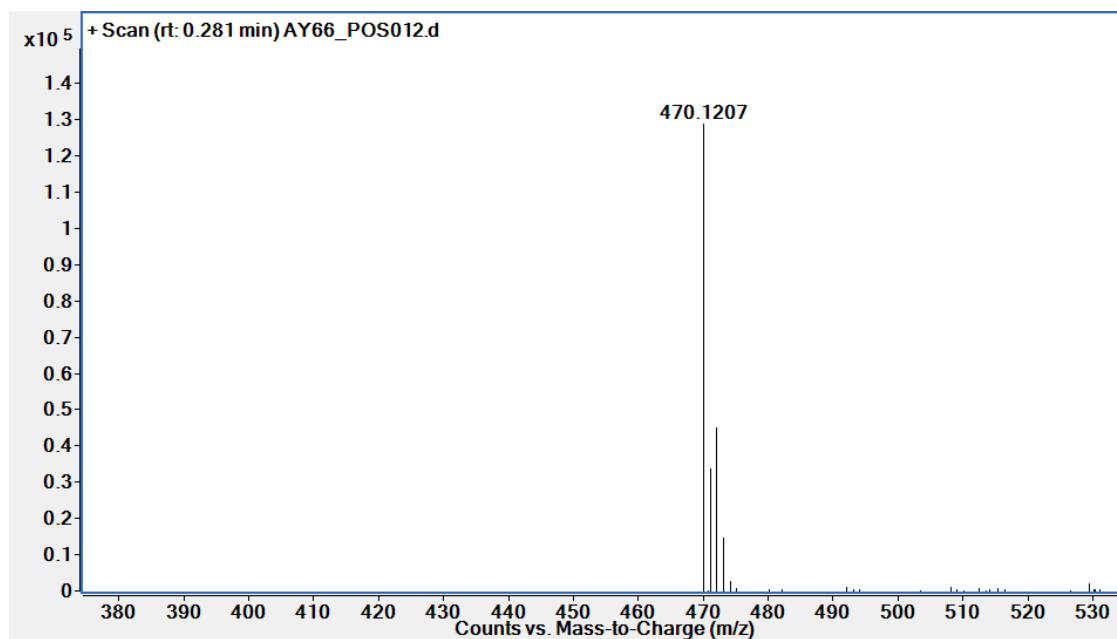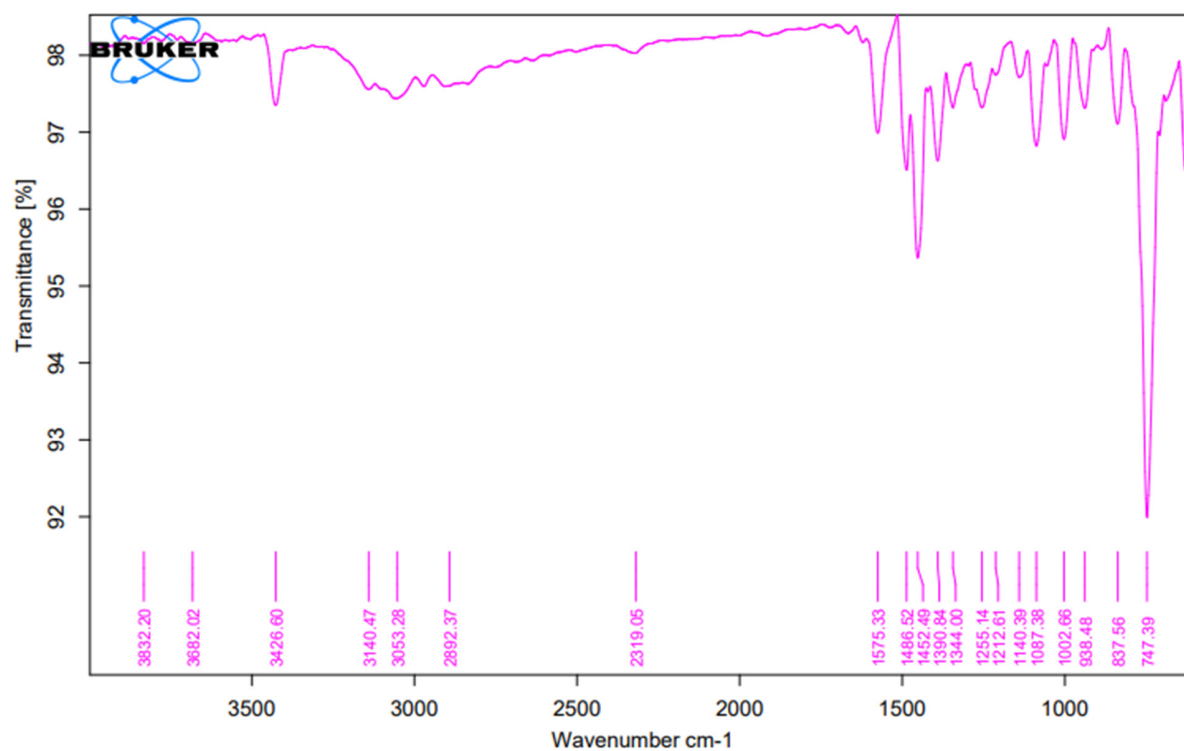

|                                         |       |                                    |            |
|-----------------------------------------|-------|------------------------------------|------------|
| C:\Users\NIPERG\Desktop\Daya\AY\AY-66.0 | AY-66 | Instrument type and / or accessory | 31-10-2022 |
|-----------------------------------------|-------|------------------------------------|------------|

AY-141

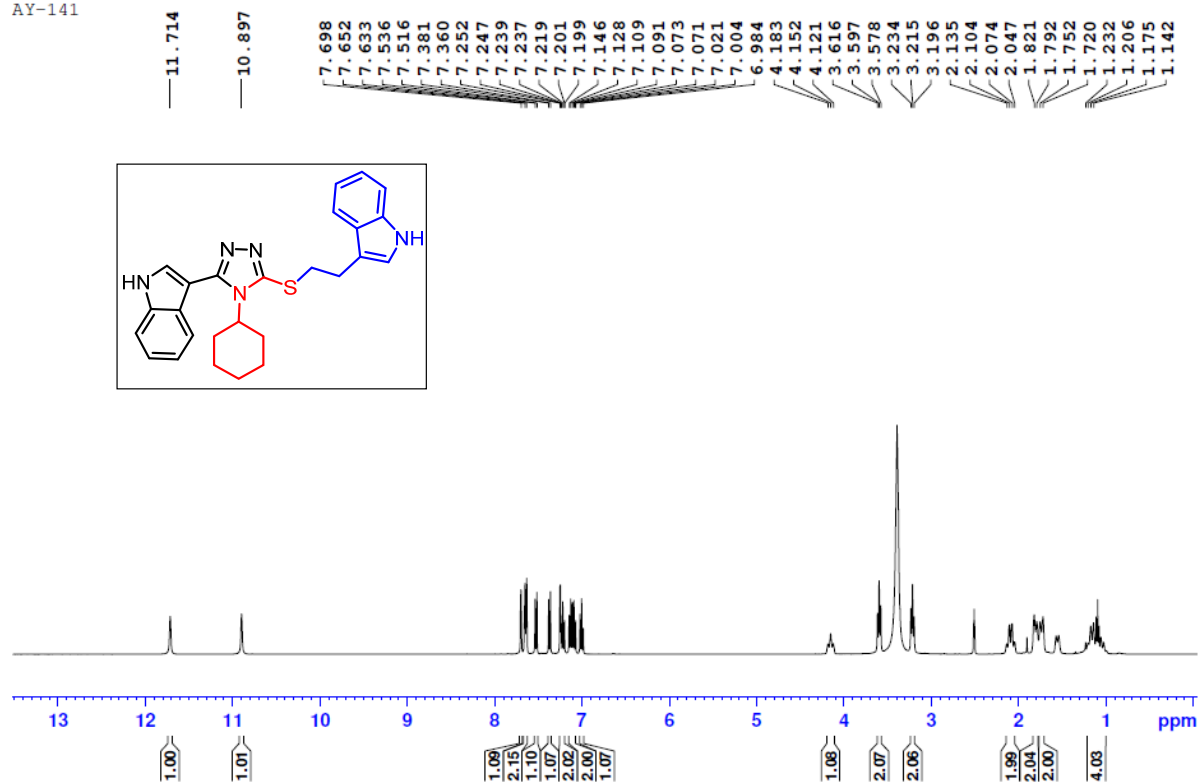

AY-141

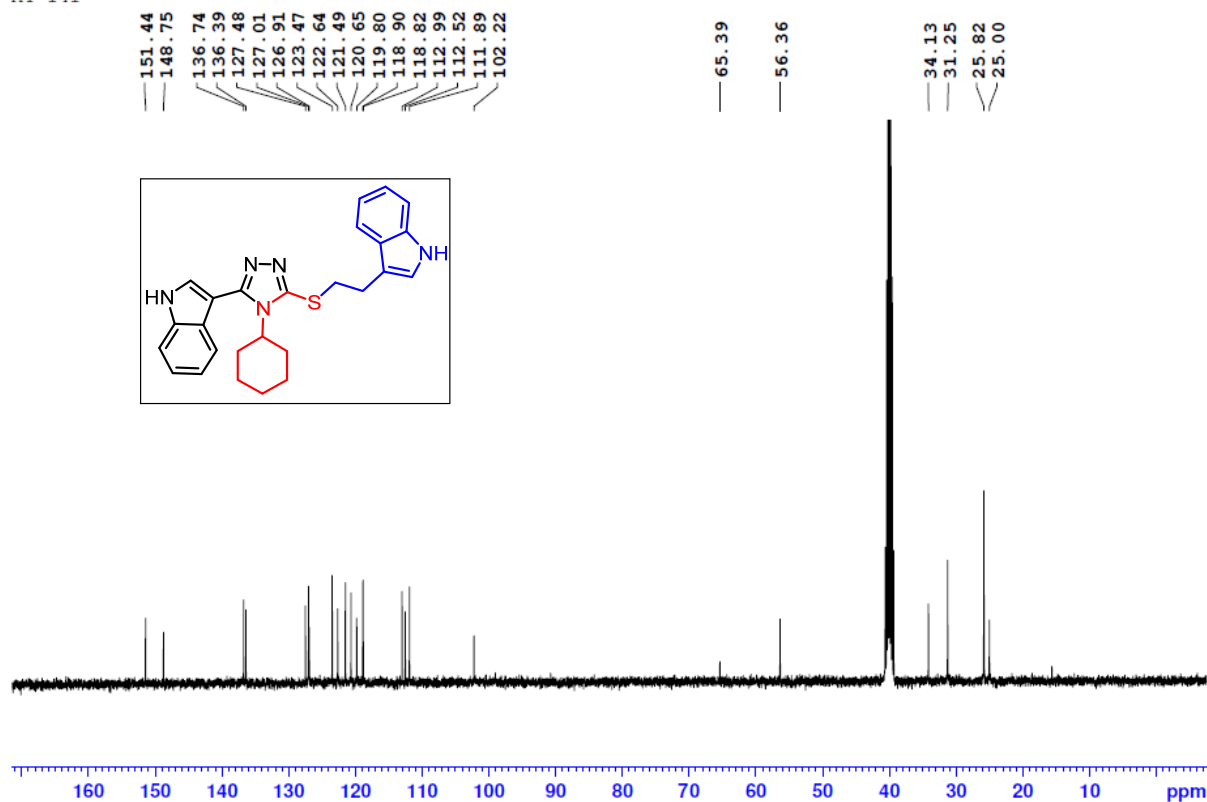

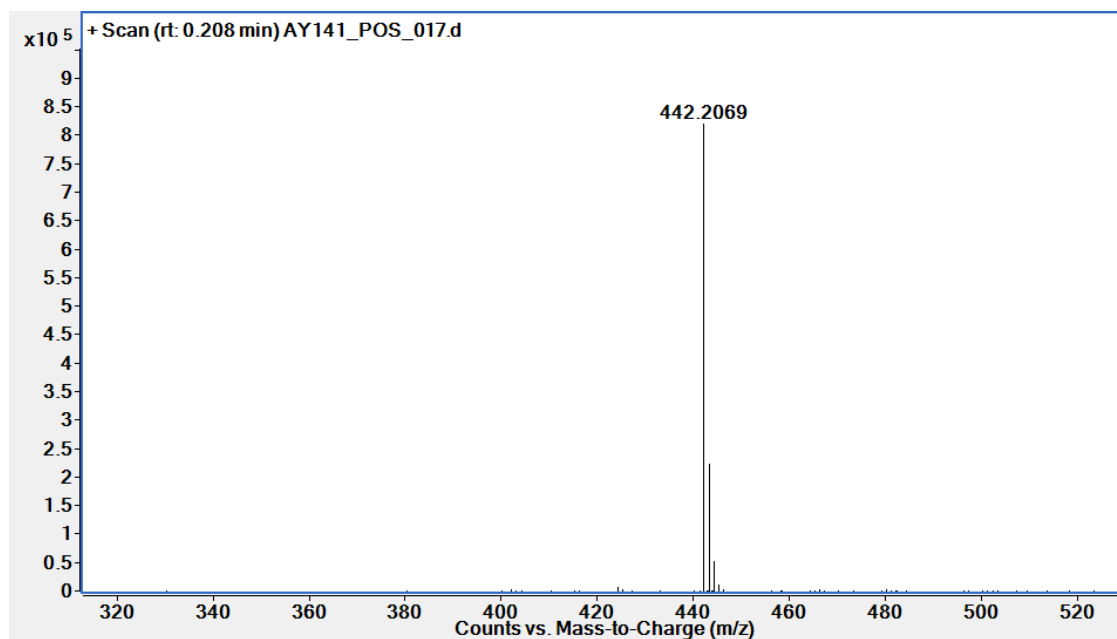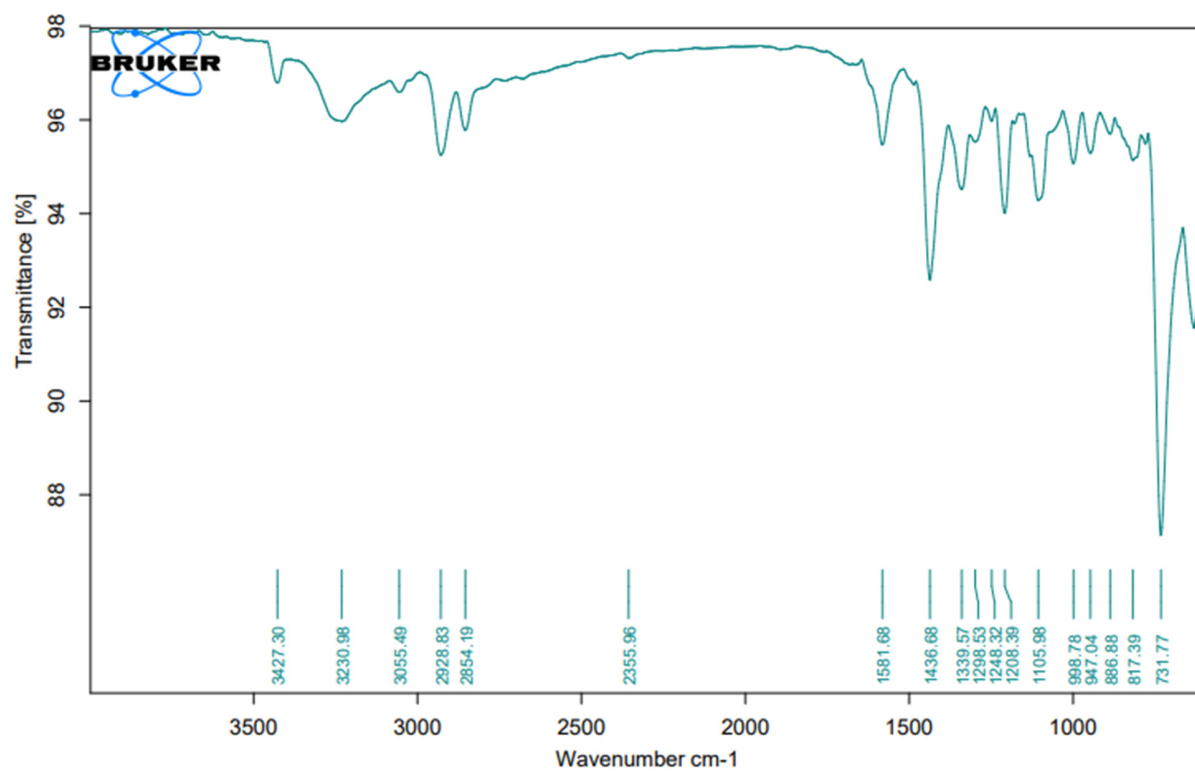

C:\Users\NIPERG\Desktop\Daya\AYAY-141.0

AY-141

Instrument type and / or accessory

01-11-2022



AY-35

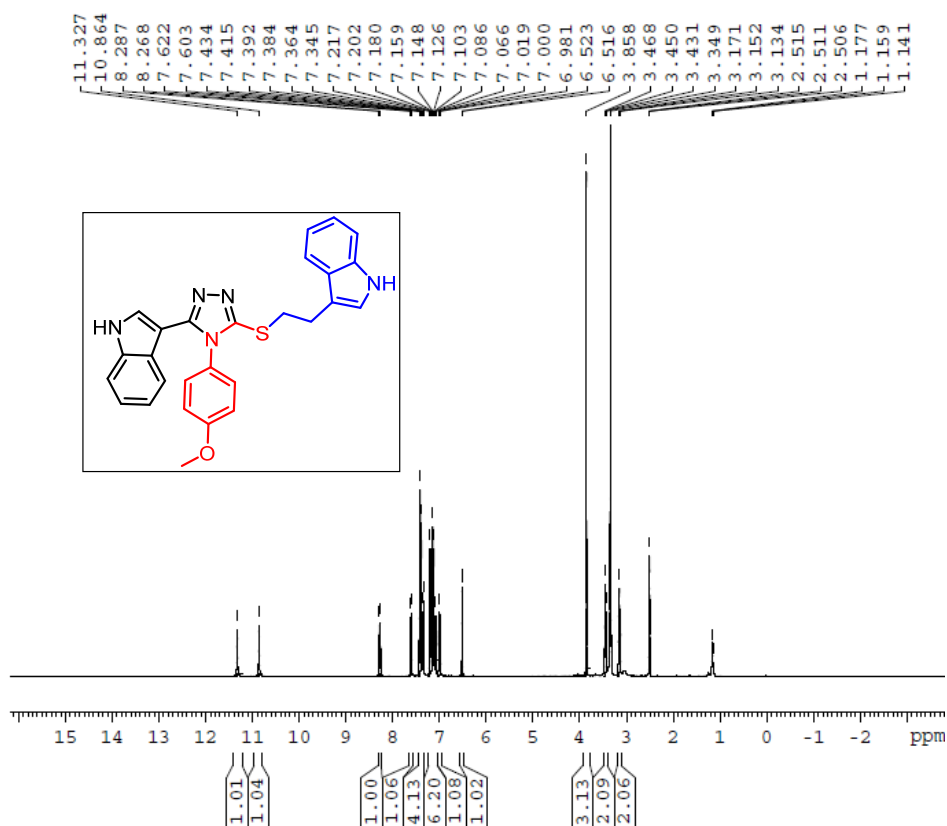

AY-35

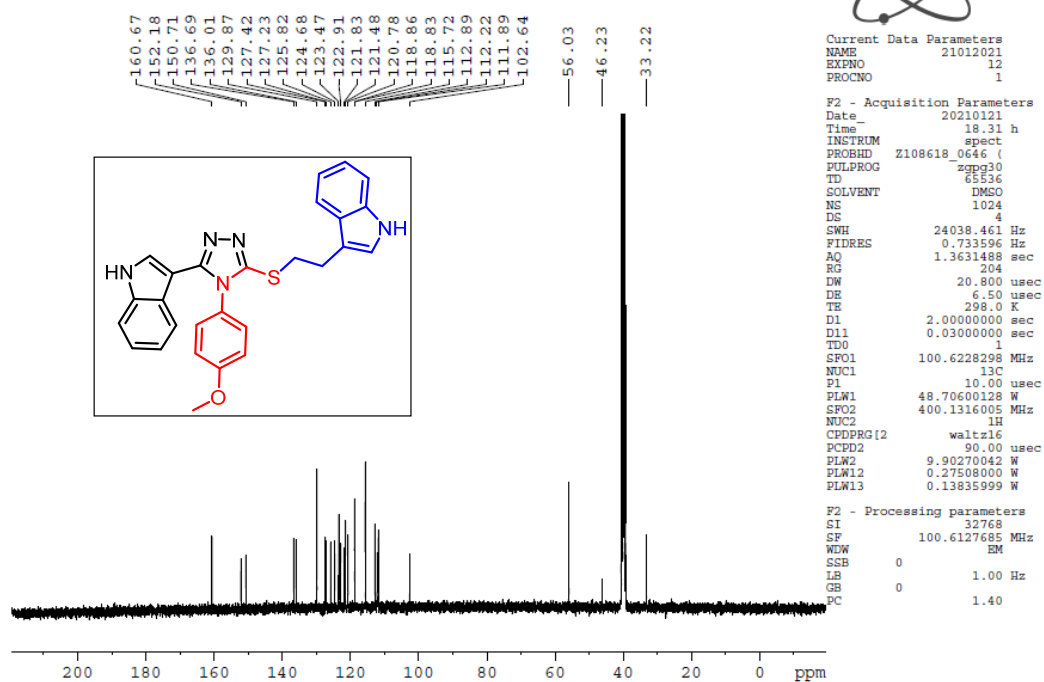

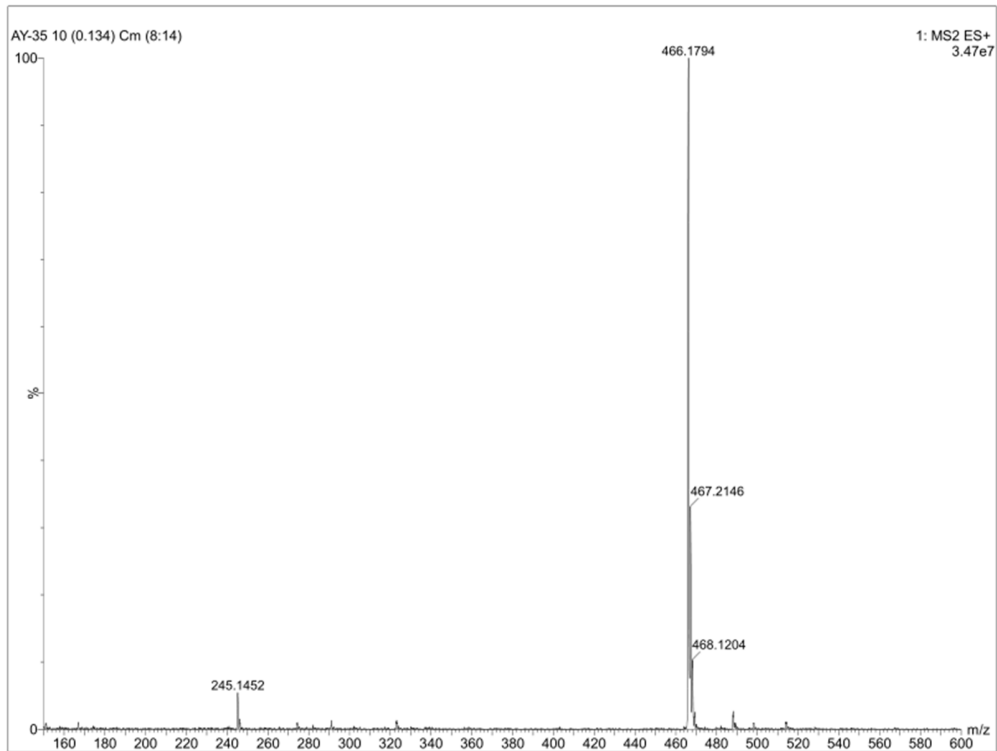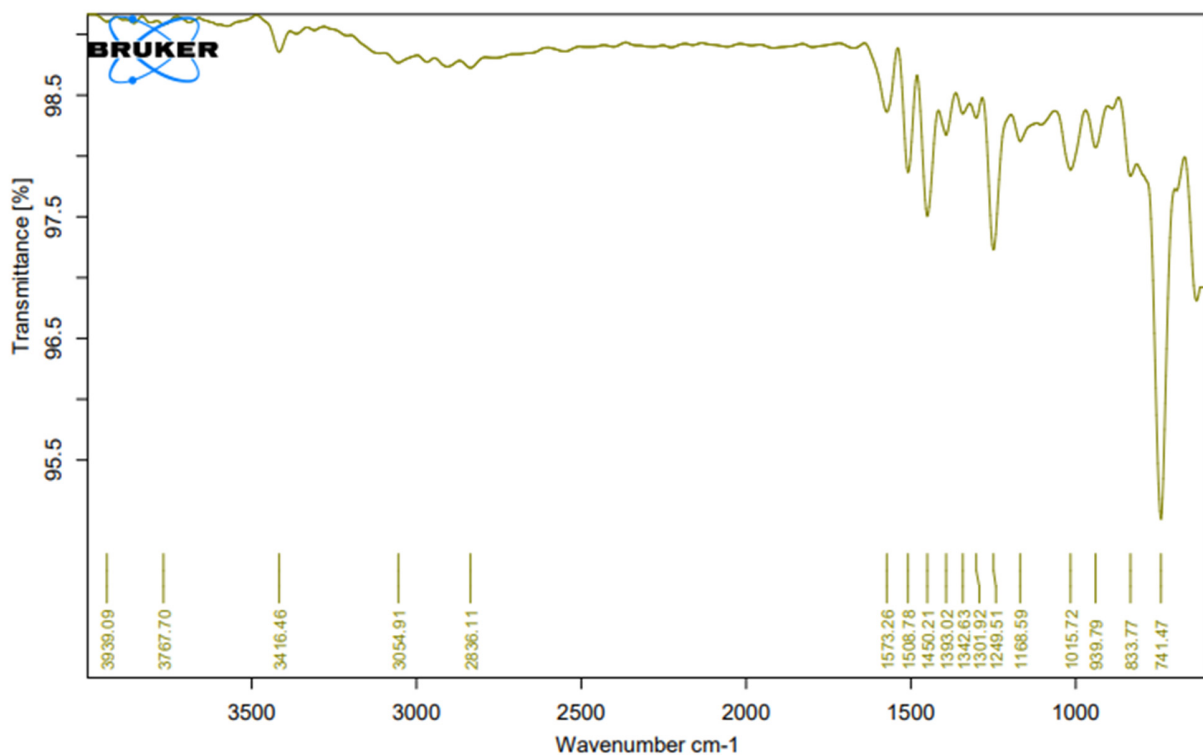

C:\Users\NIPERG\Desktop\Daya\AY\AY-35.0

AY-35

Instrument type and / or accessory

01-11-2022

AY-53

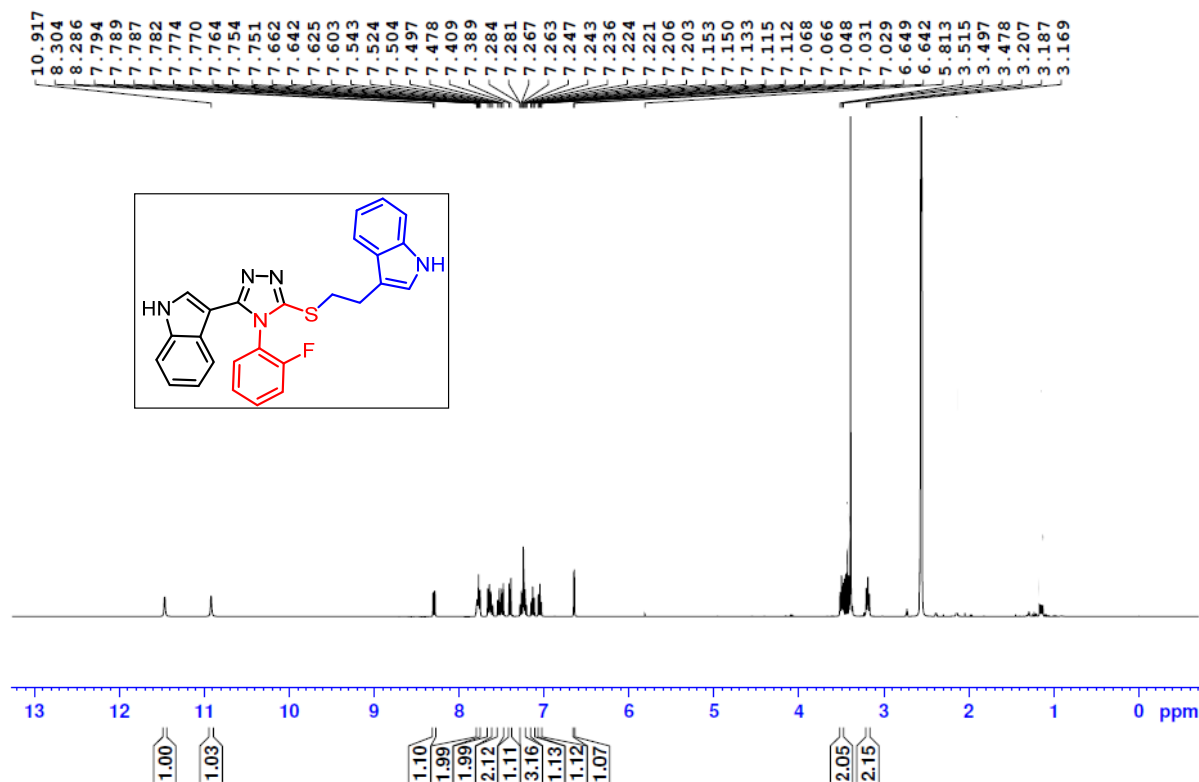

AY-53

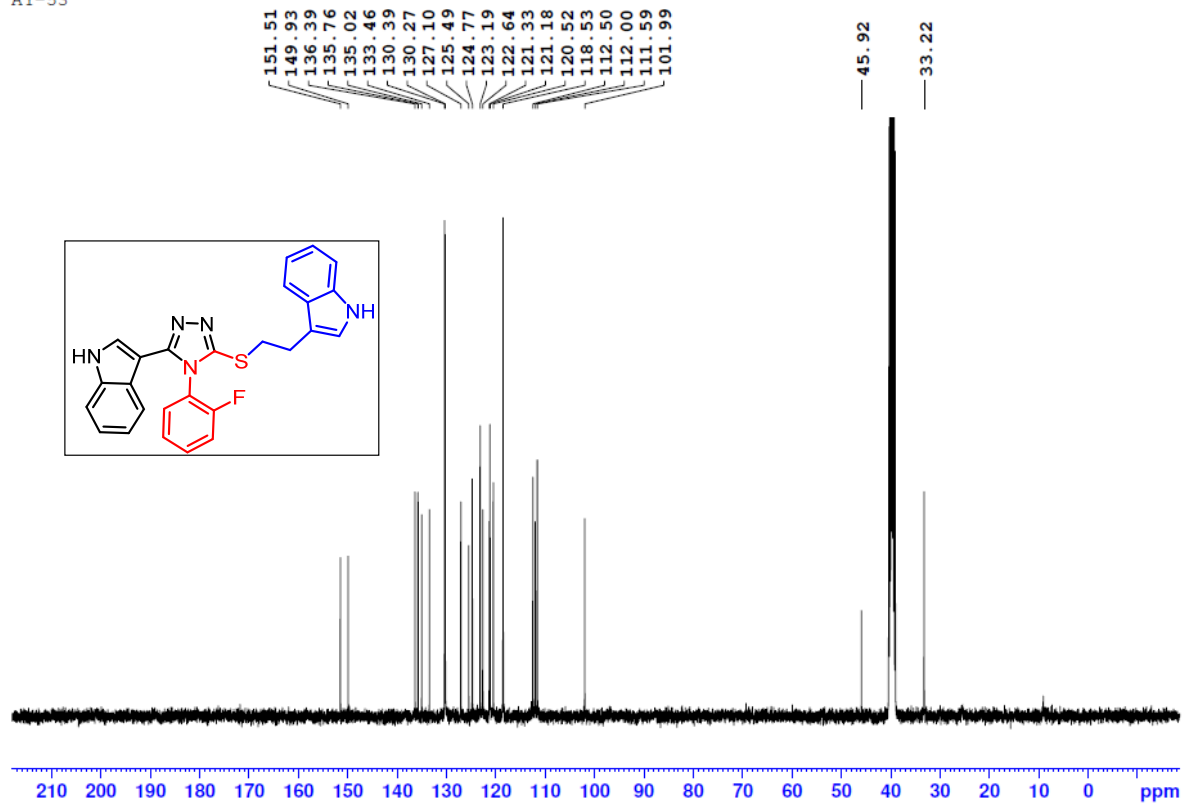

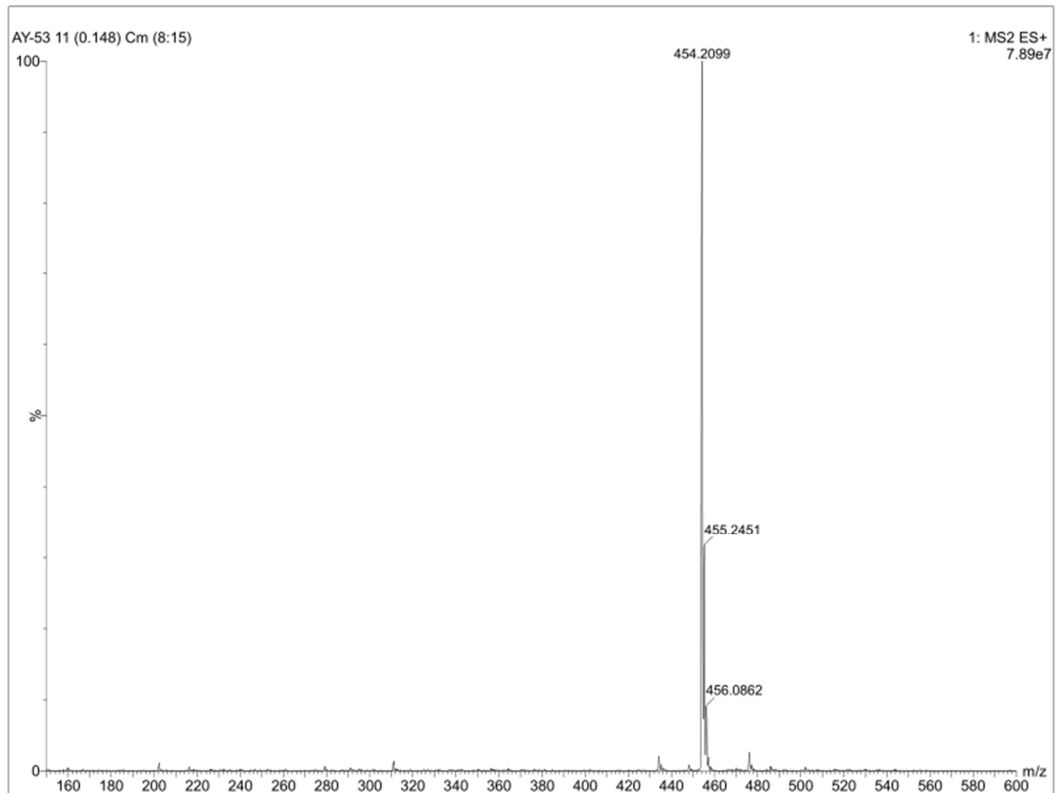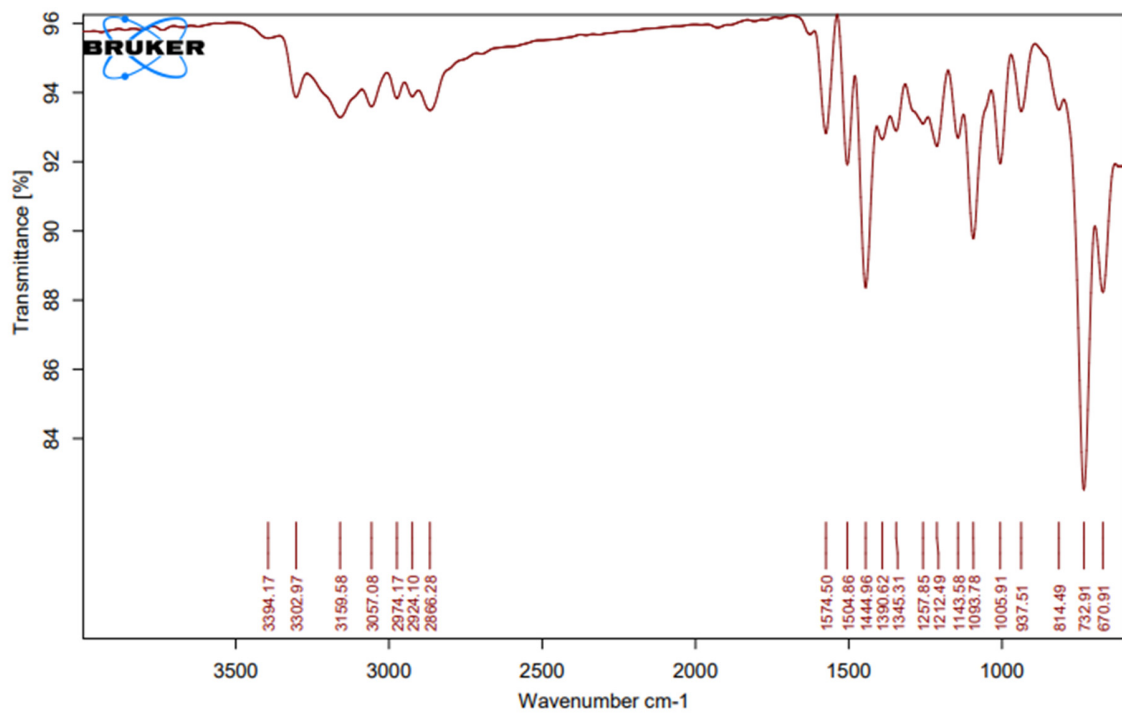

C:\Users\NIPERG\Desktop\Daya\AY\AY-53.0

AY-53

Instrument type and / or accessory

01-11-2022

AY-52

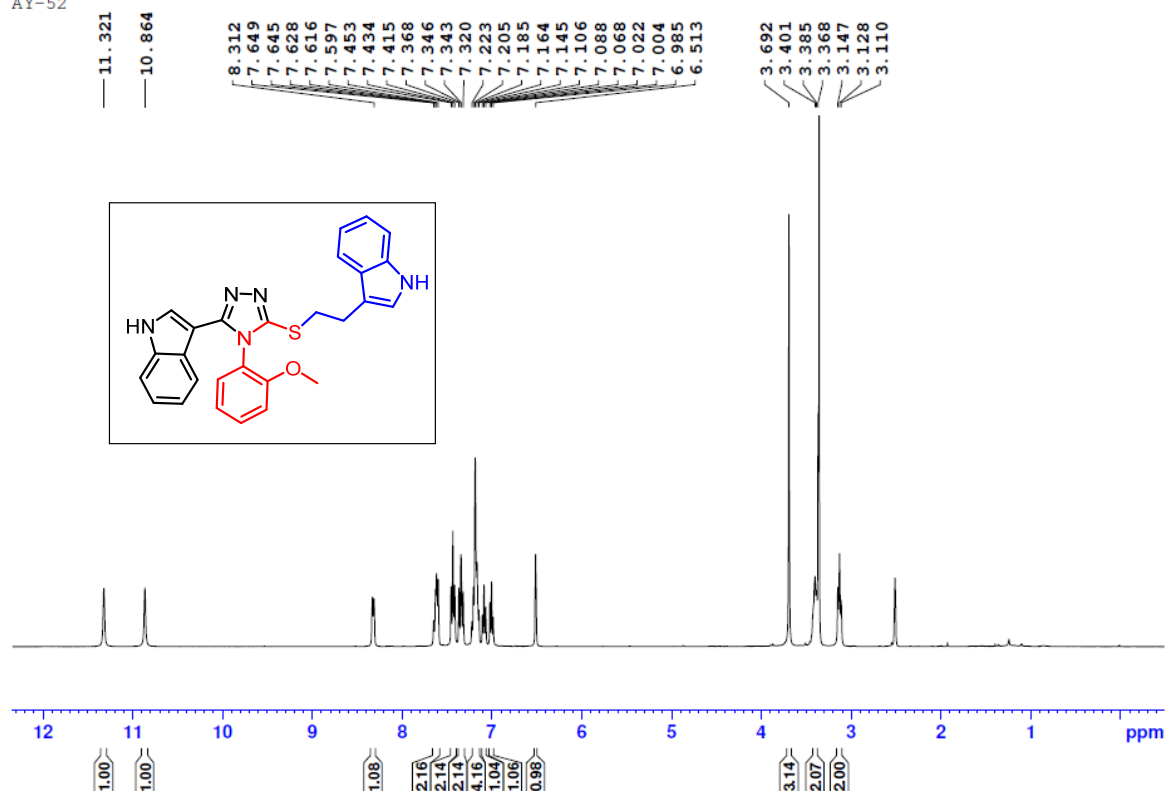

AY-52

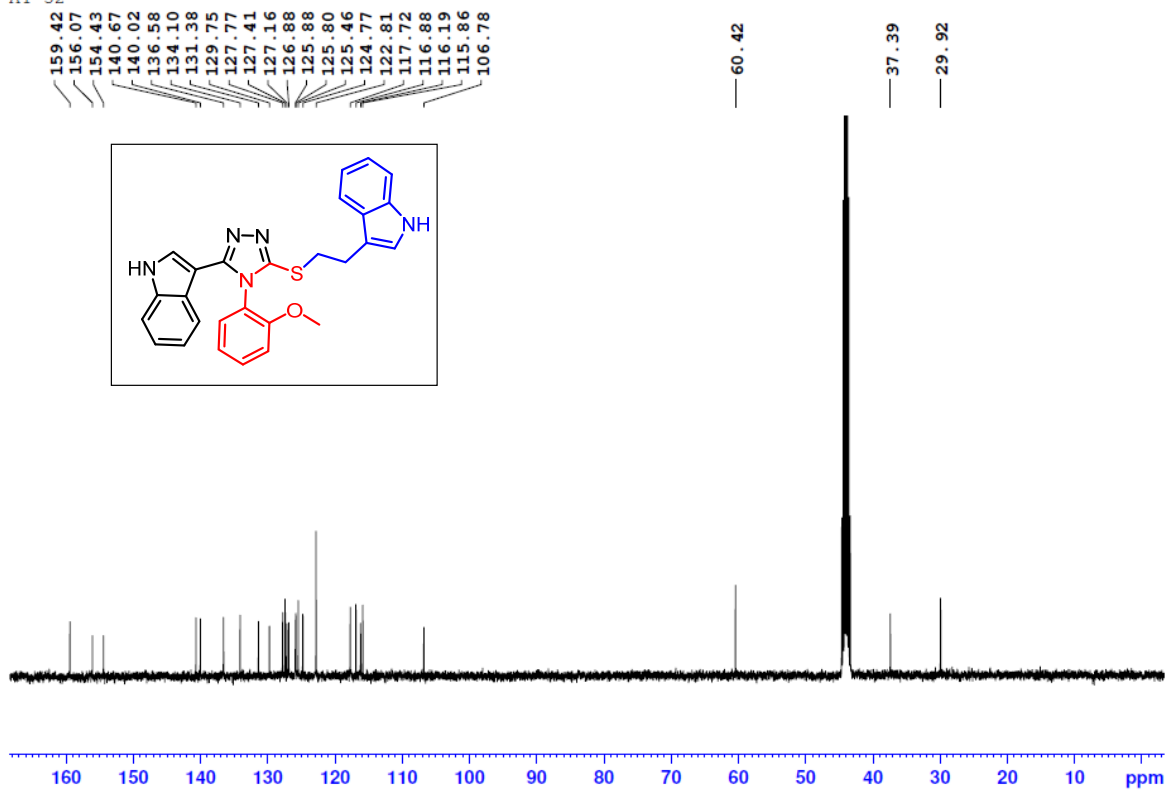

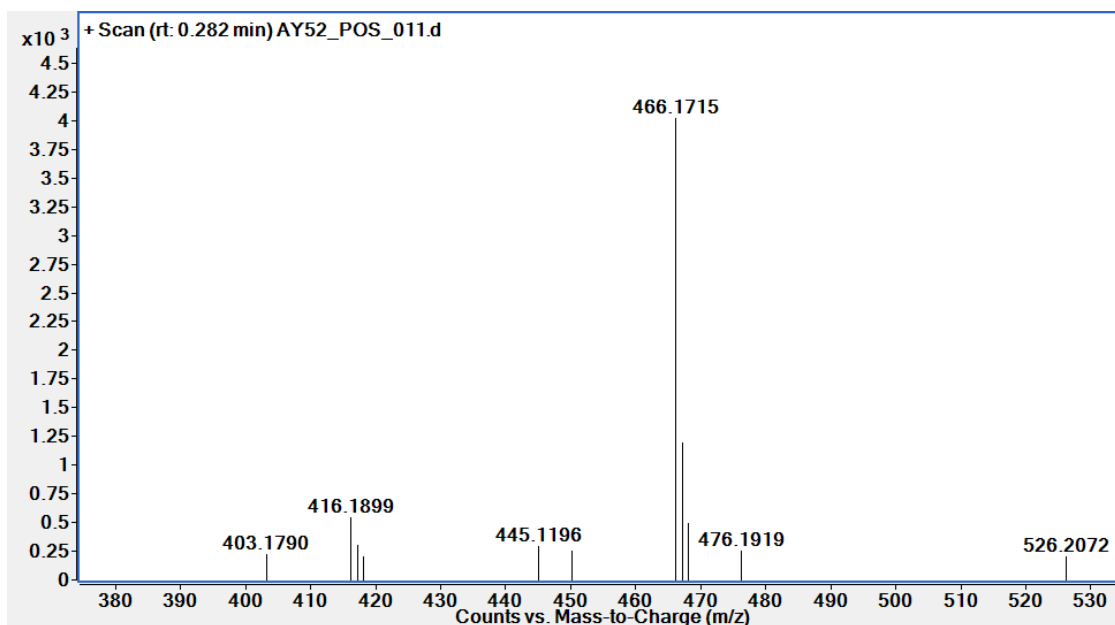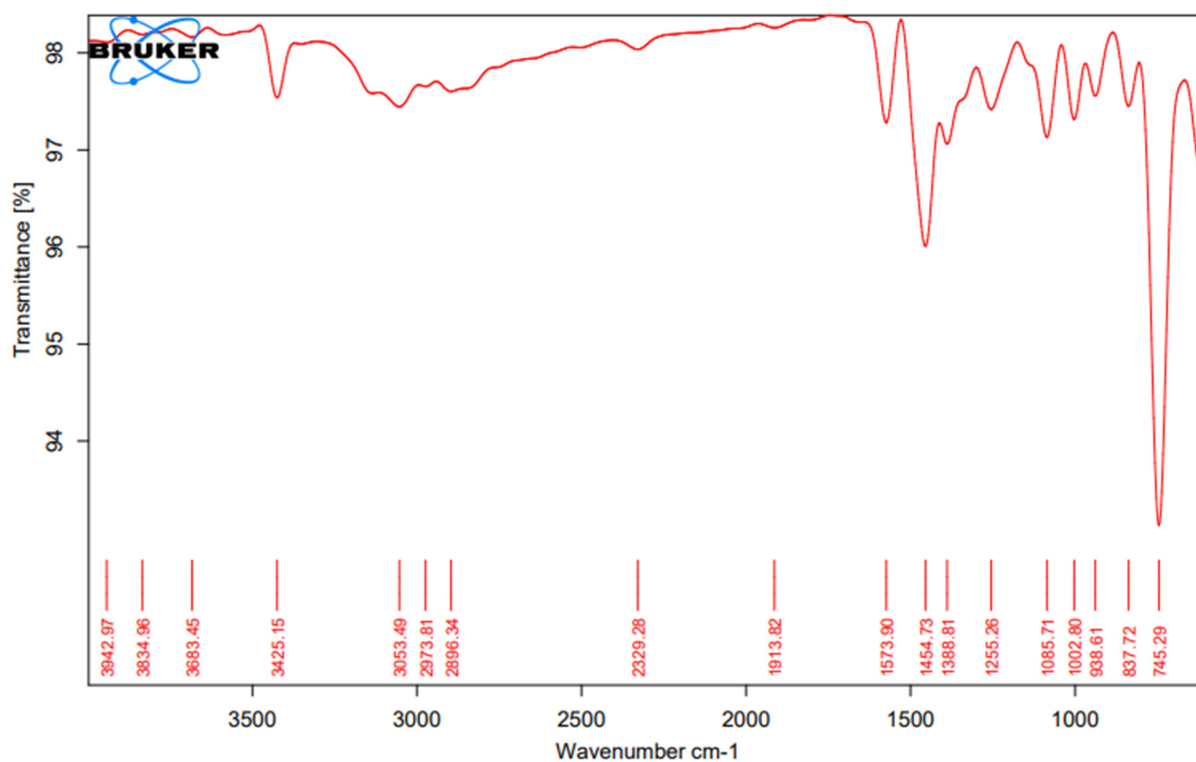

C:\Users\NIPERG\Desktop\Daya\AY\AY-66.0

AY-52

Instrument type and / or accessory

31-10-2022

AY-166

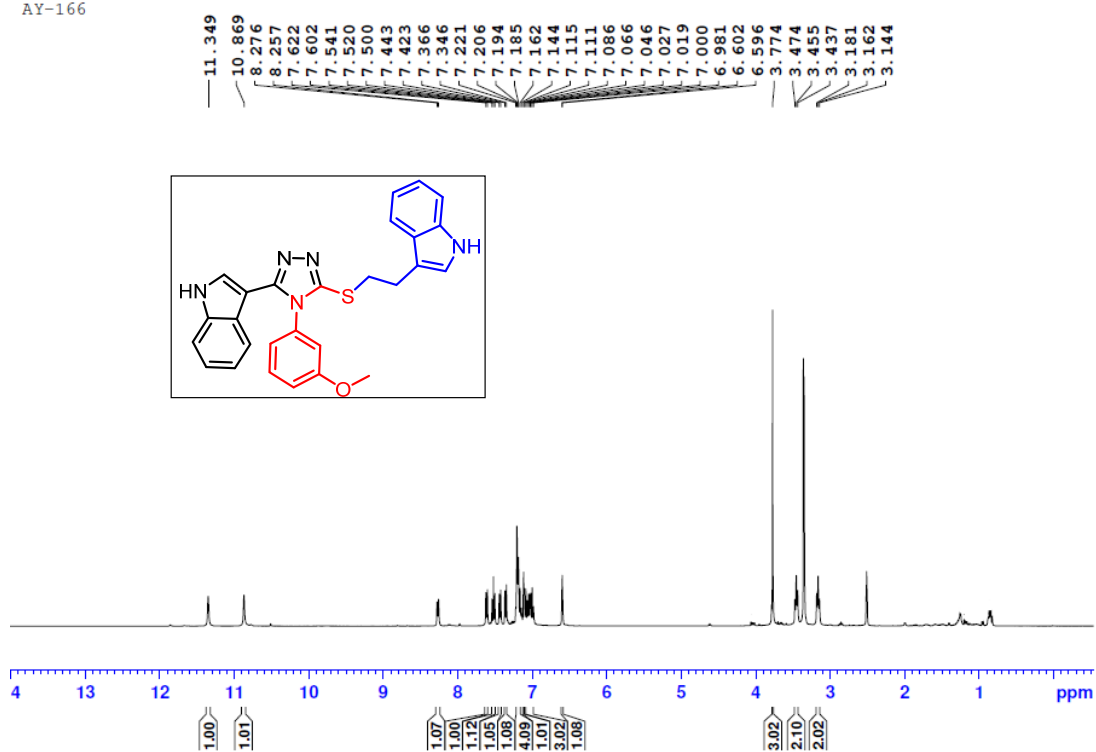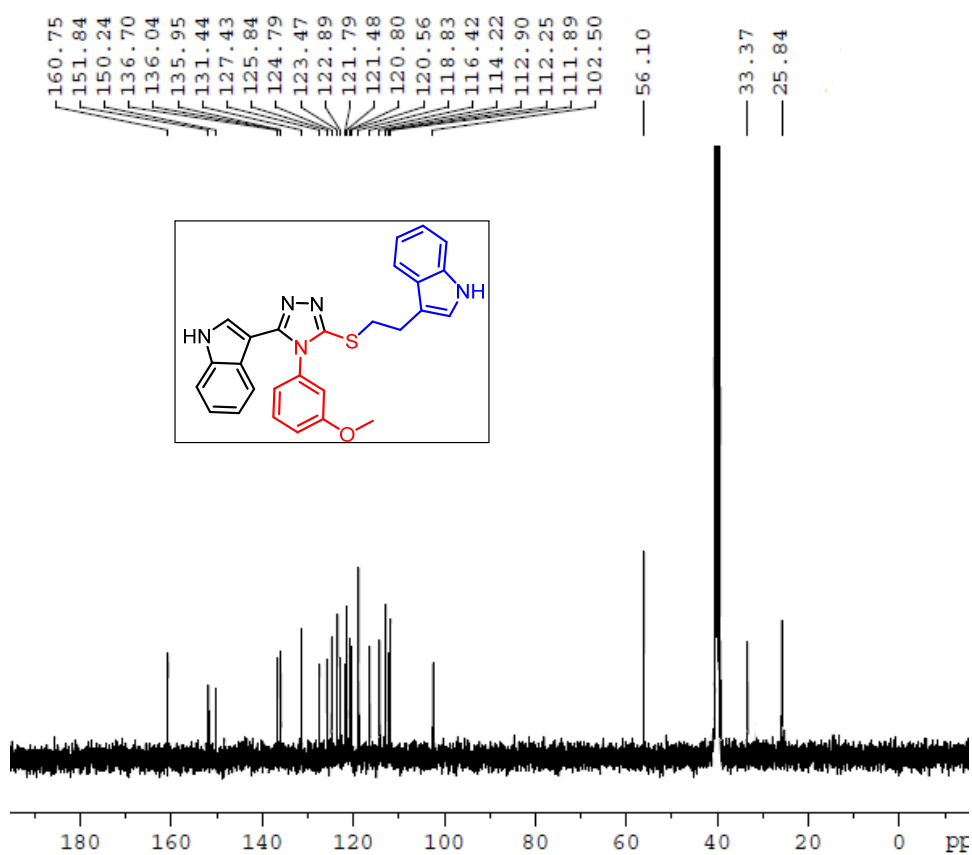

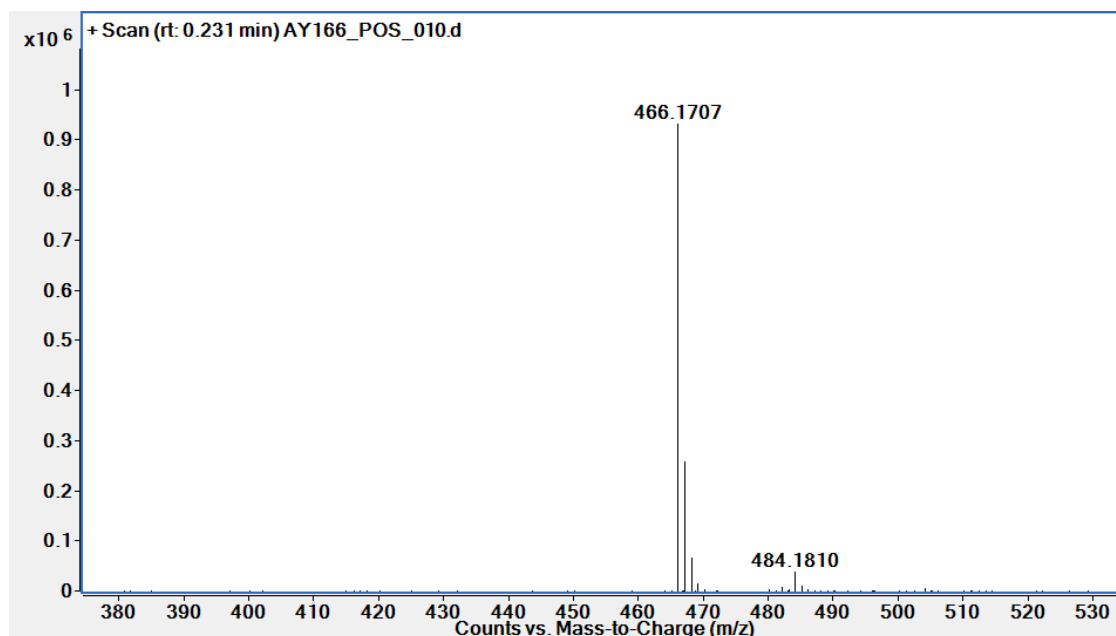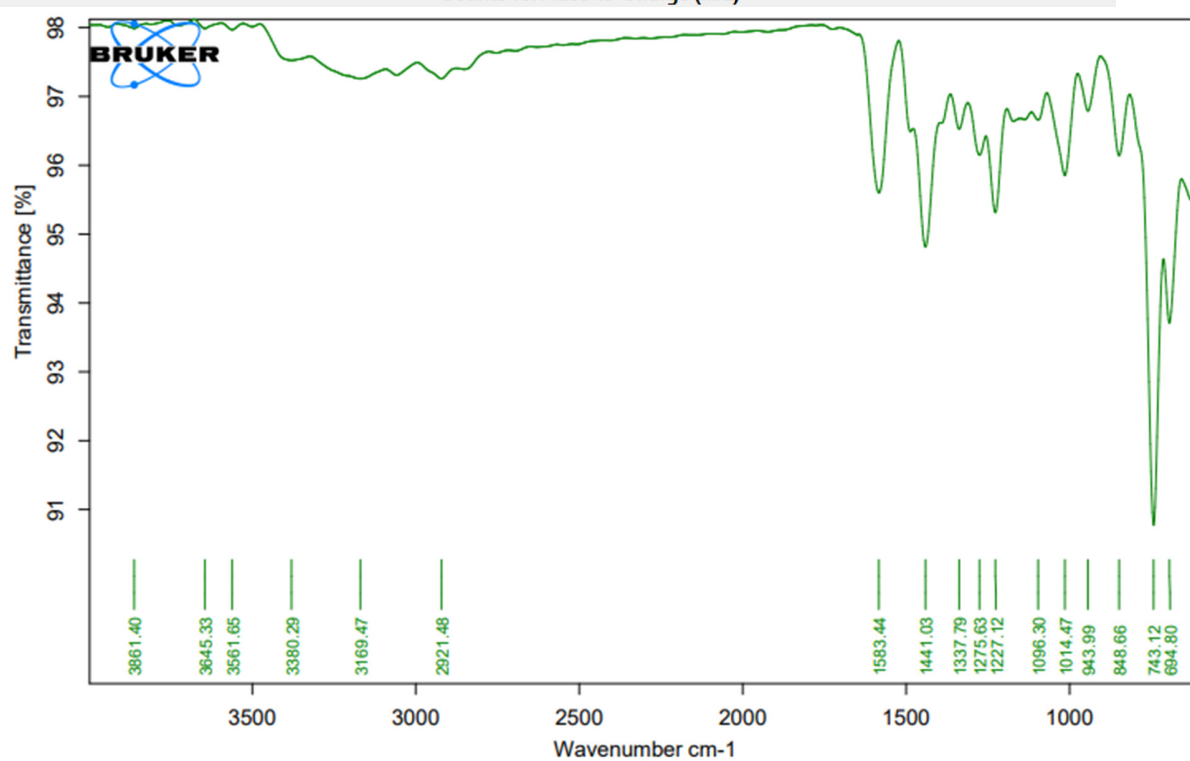

C:\Users\NIPERG\Desktop\Daya\AYAY-166.0

AY-166

Instrument type and / or accessory

01-11-2022



AY-68

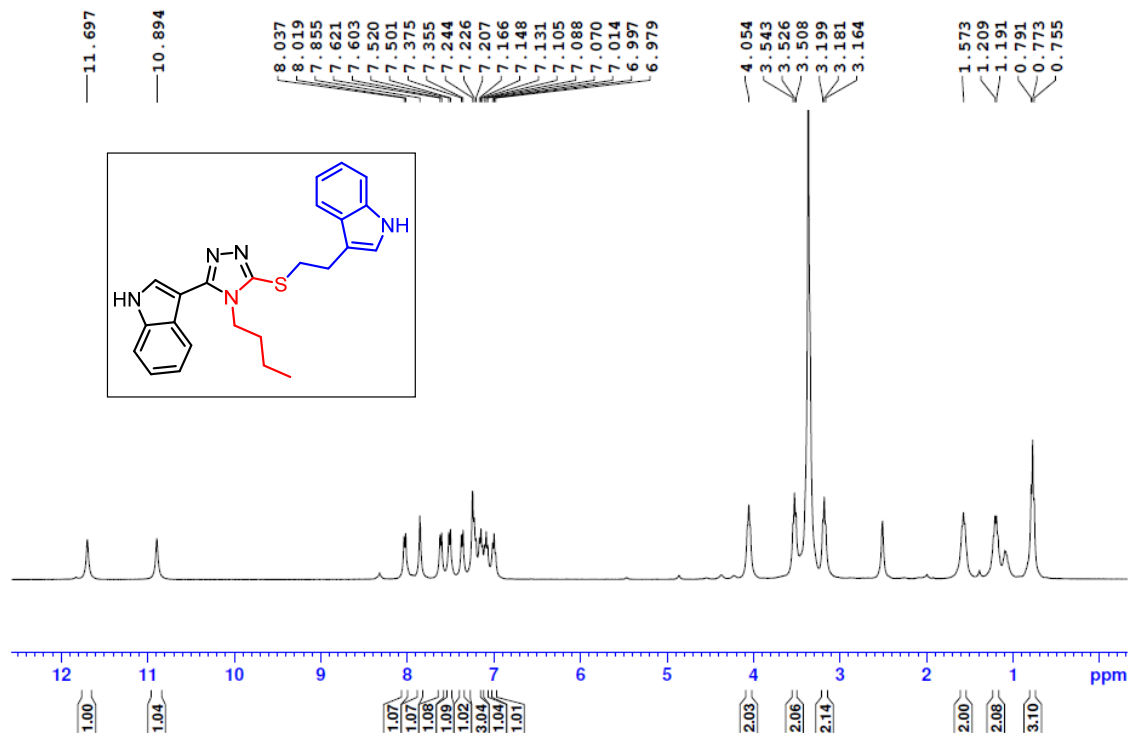

AY-68  
C13CPD DMSO {D:\data\SPS} nmrsu 2

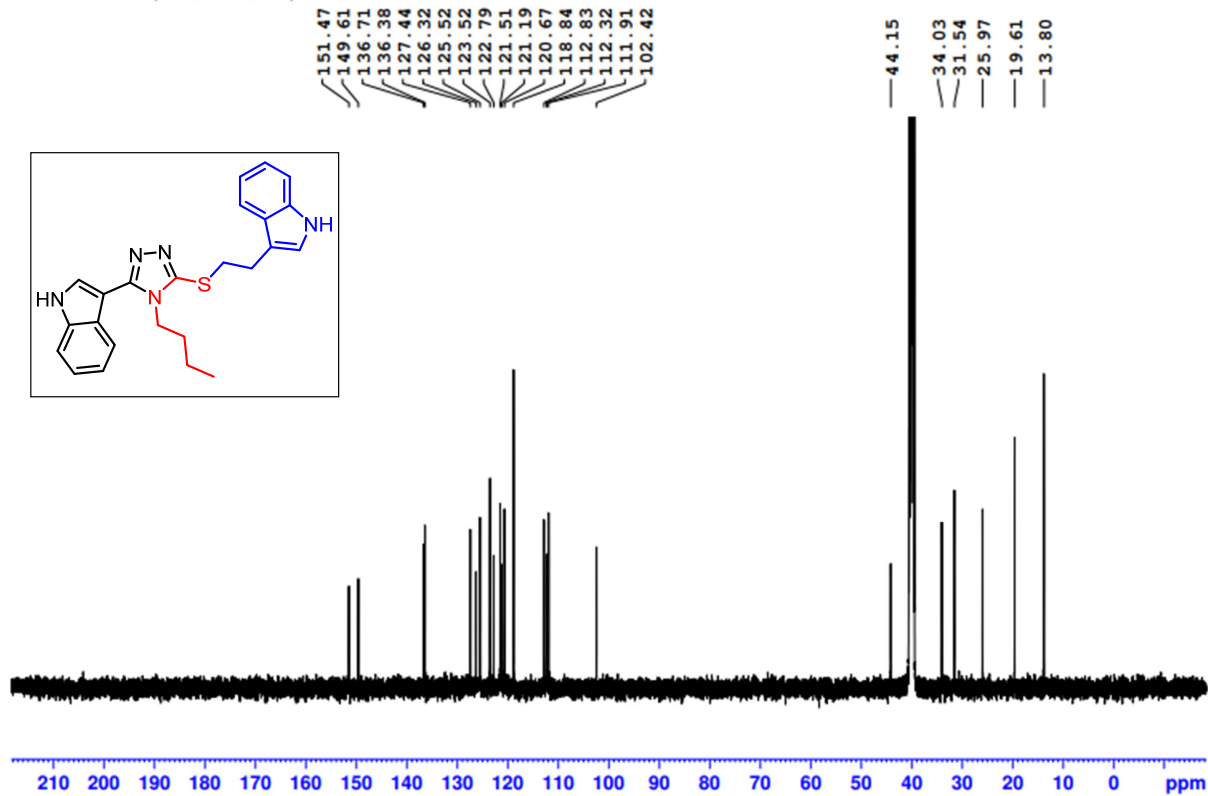

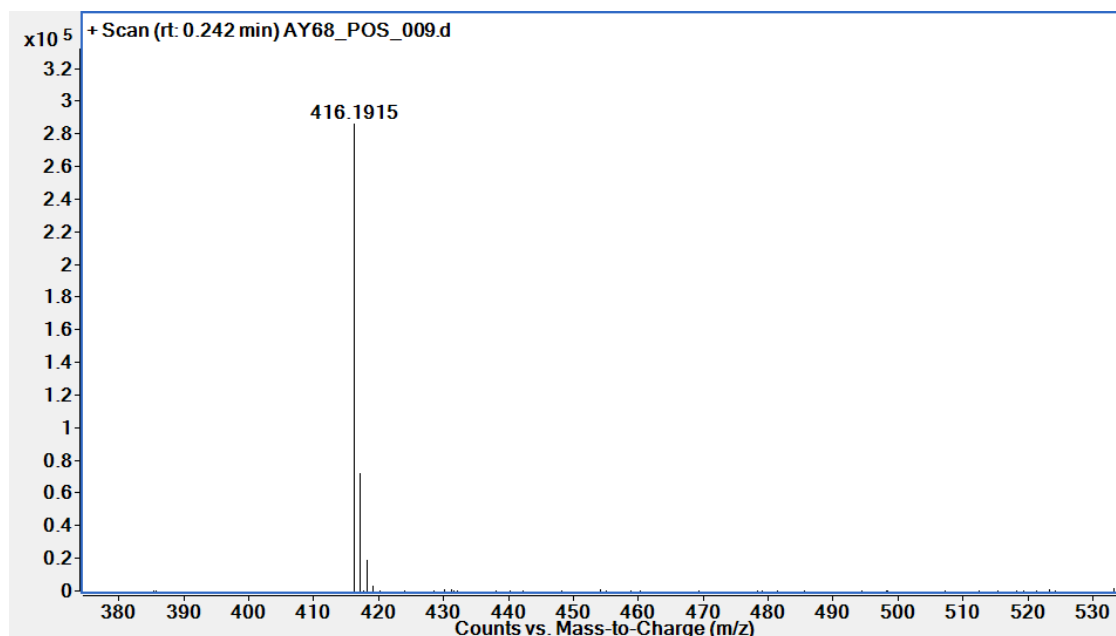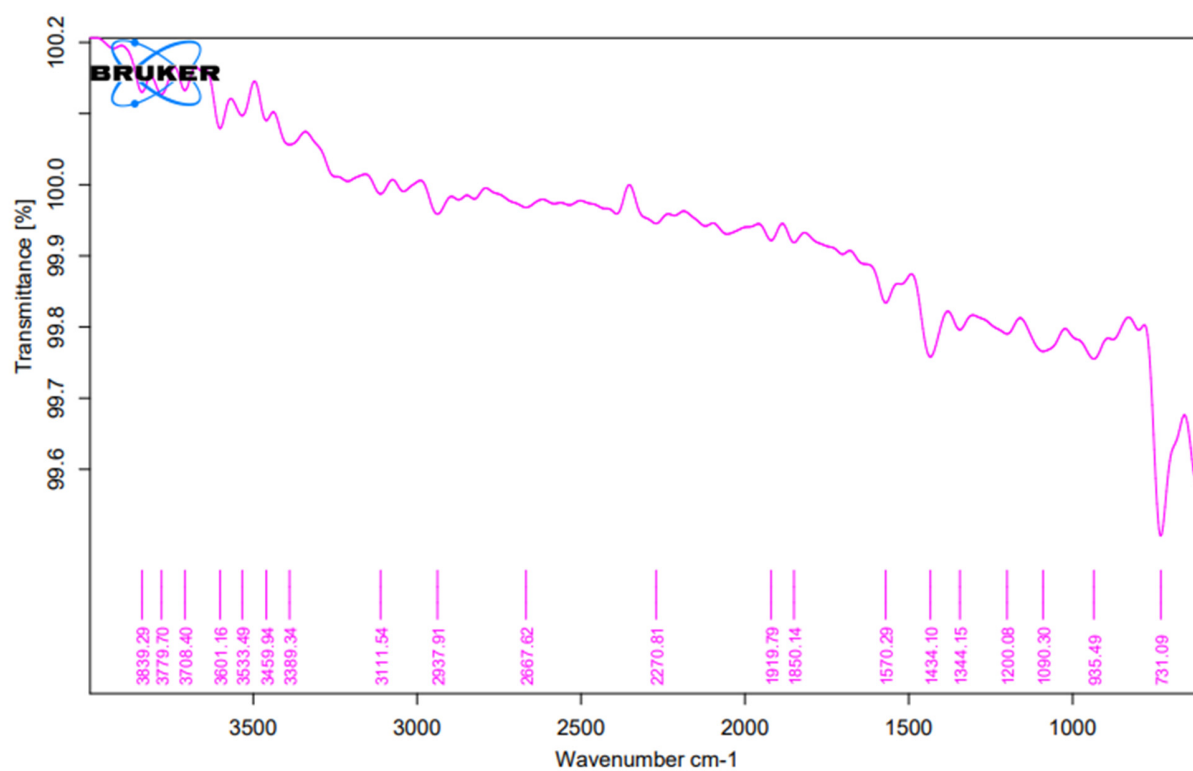

C:\Users\NIPERG\Desktop\Daya\AY\AY-68.0

AY-68

Instrument type and / or accessory

01-11-2022

AY-73

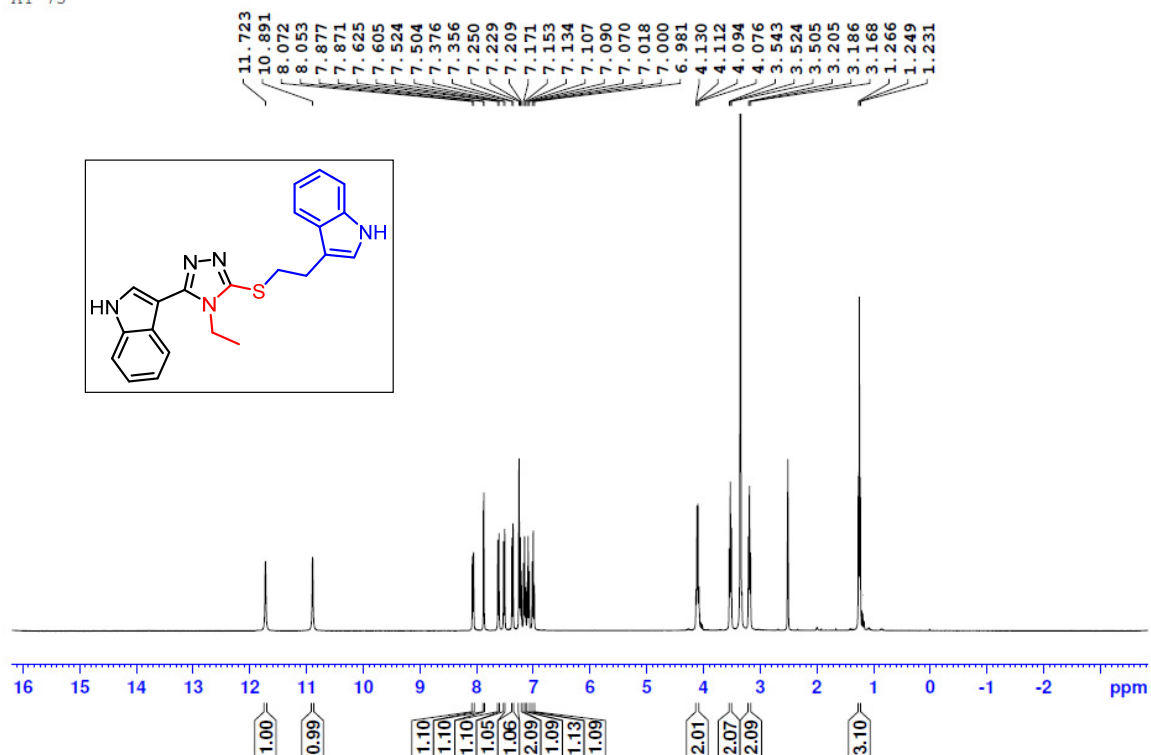

AY-73

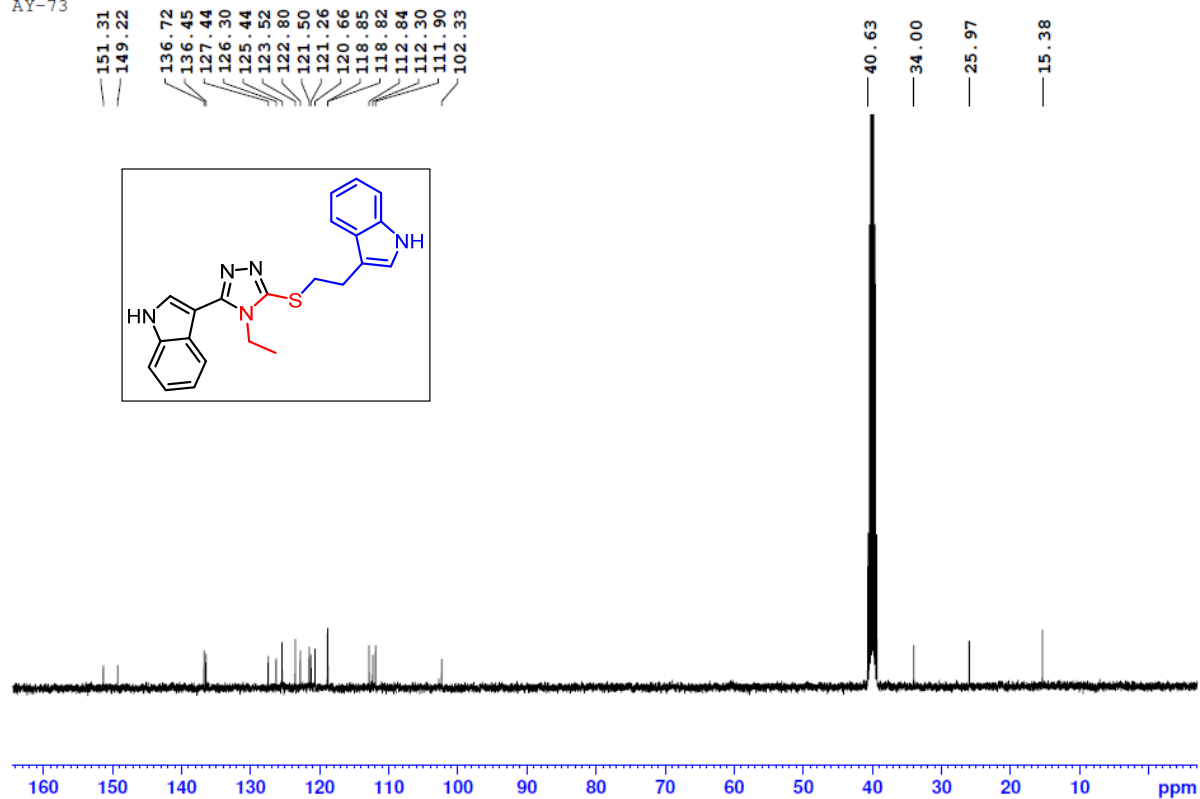

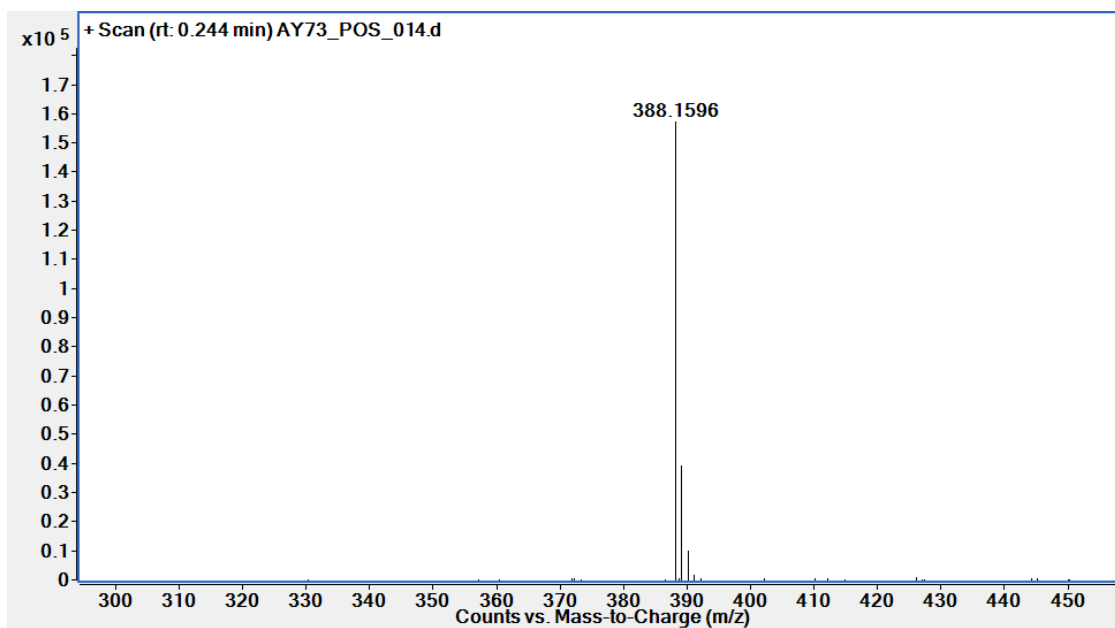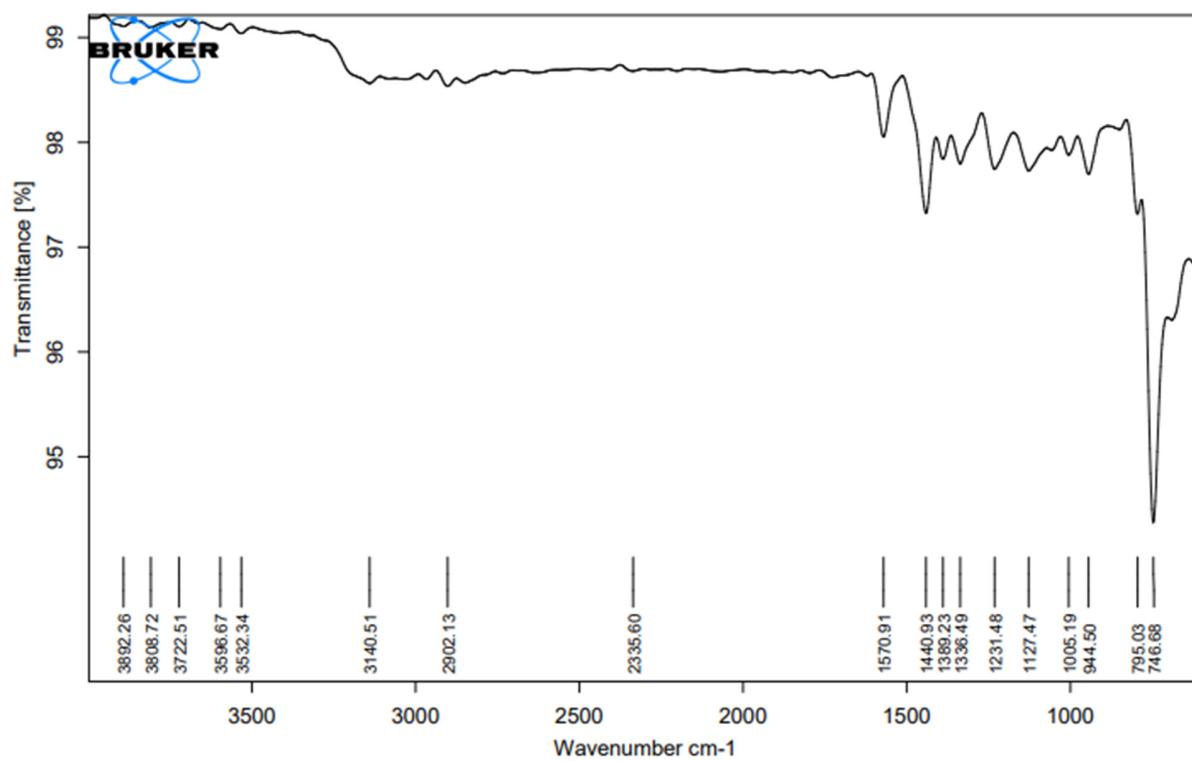

C:\Users\NIPERG\Desktop\Daya\AY\AY-73.0

AY-73

Instrument type and / or accessory

01-11-2022

AY-70

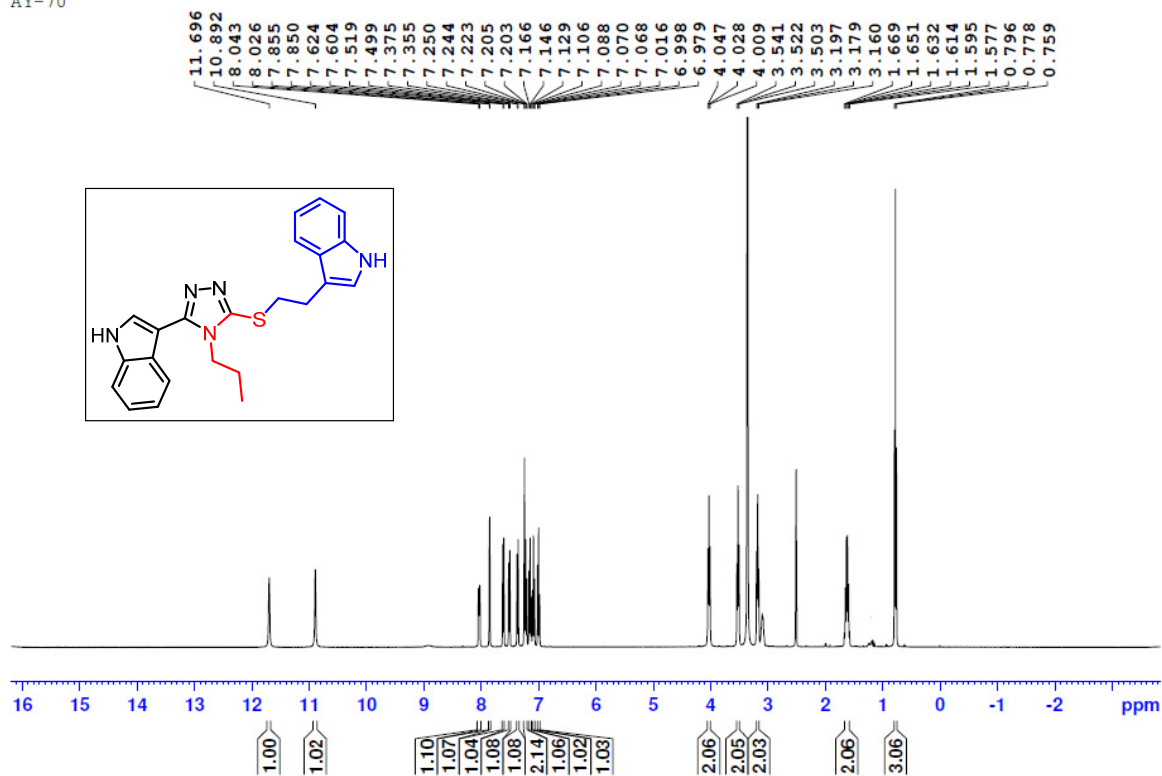

AY-70

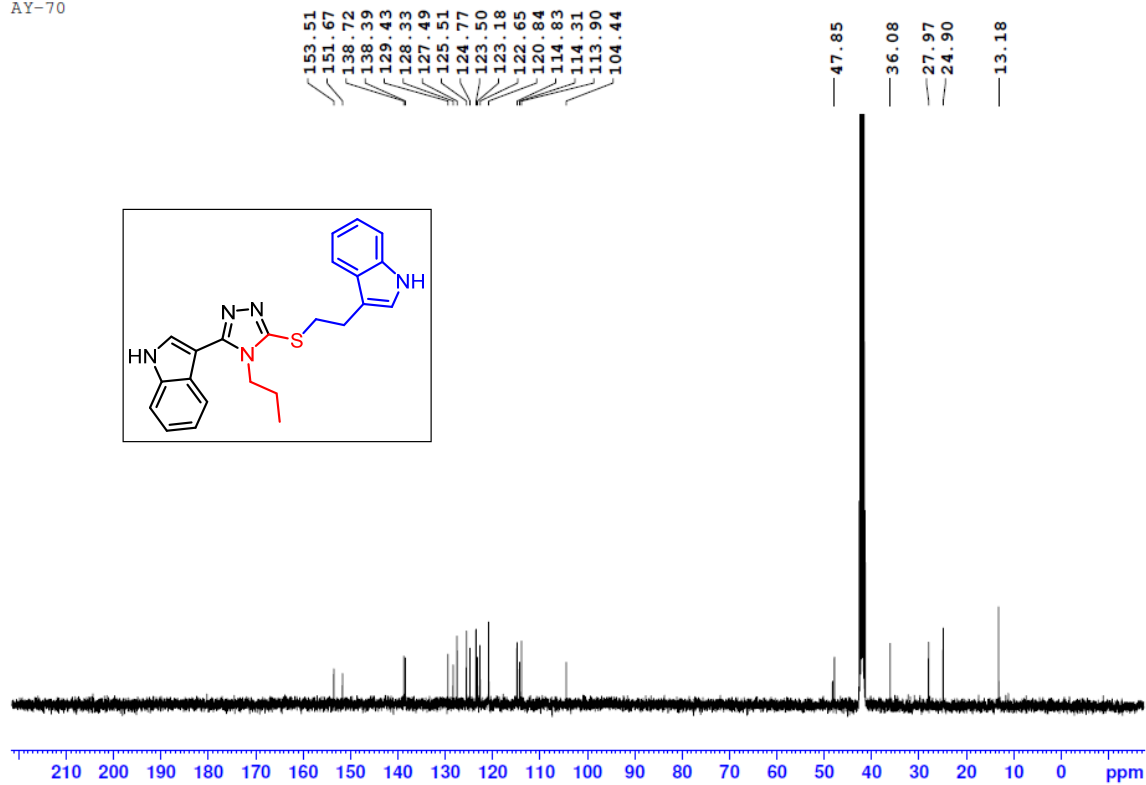

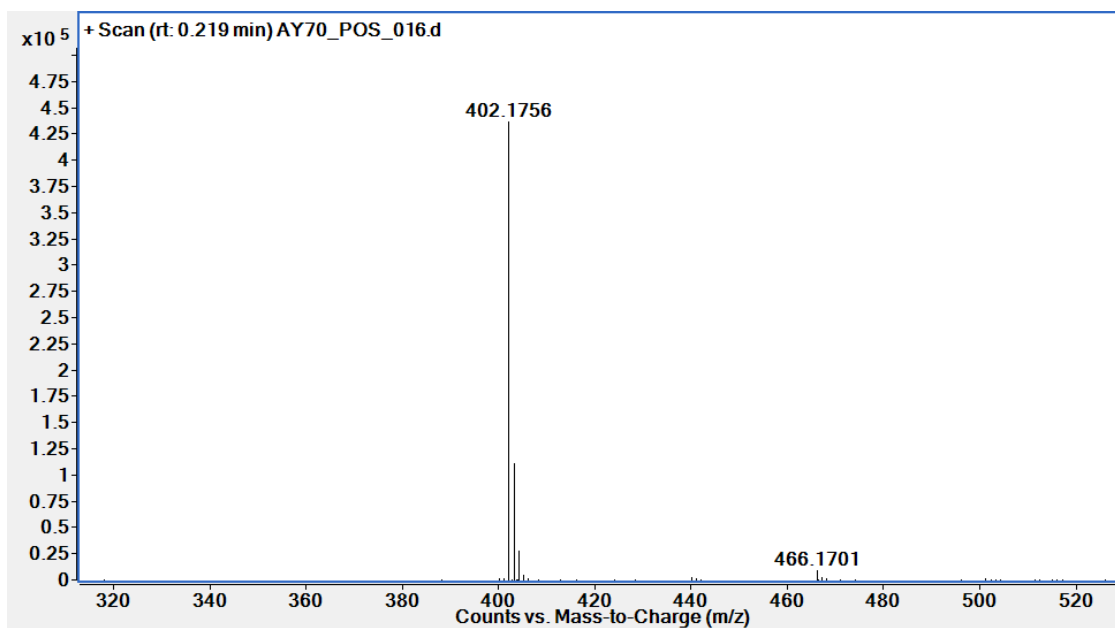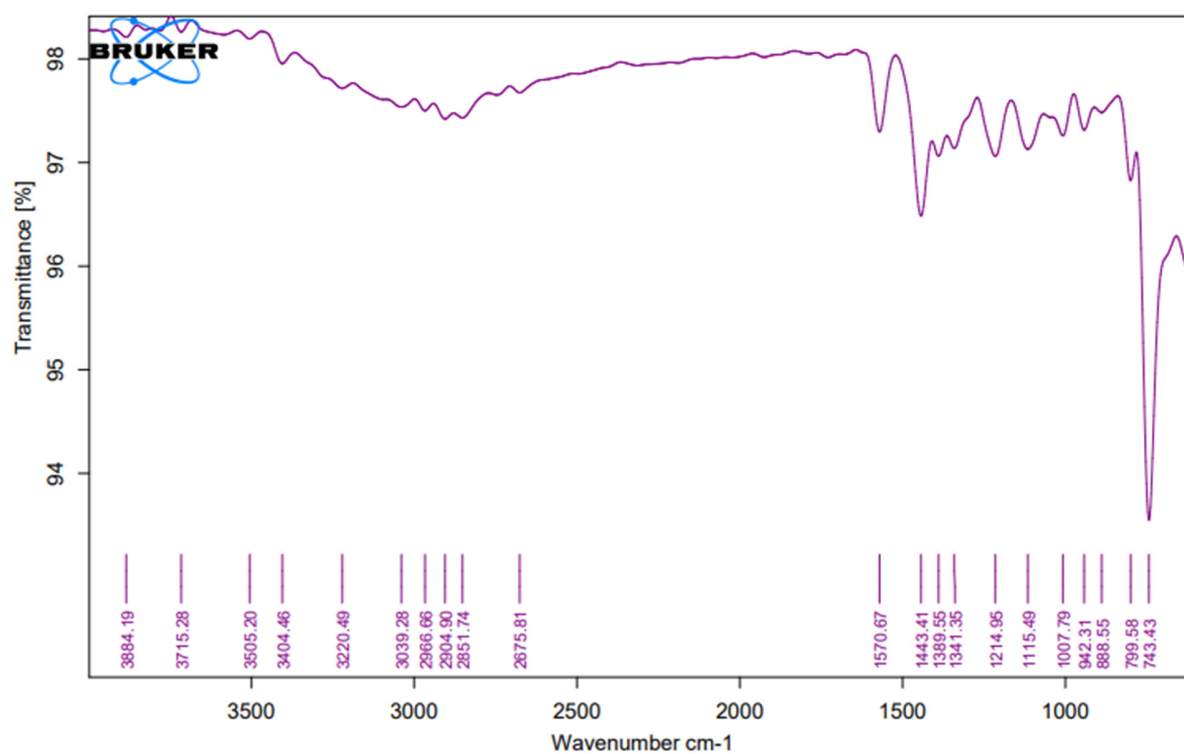

C:\Users\NIPERG\Desktop\Daya\AY\AY-70.0

AY-70

Instrument type and / or accessory

01-11-2022

AY-56

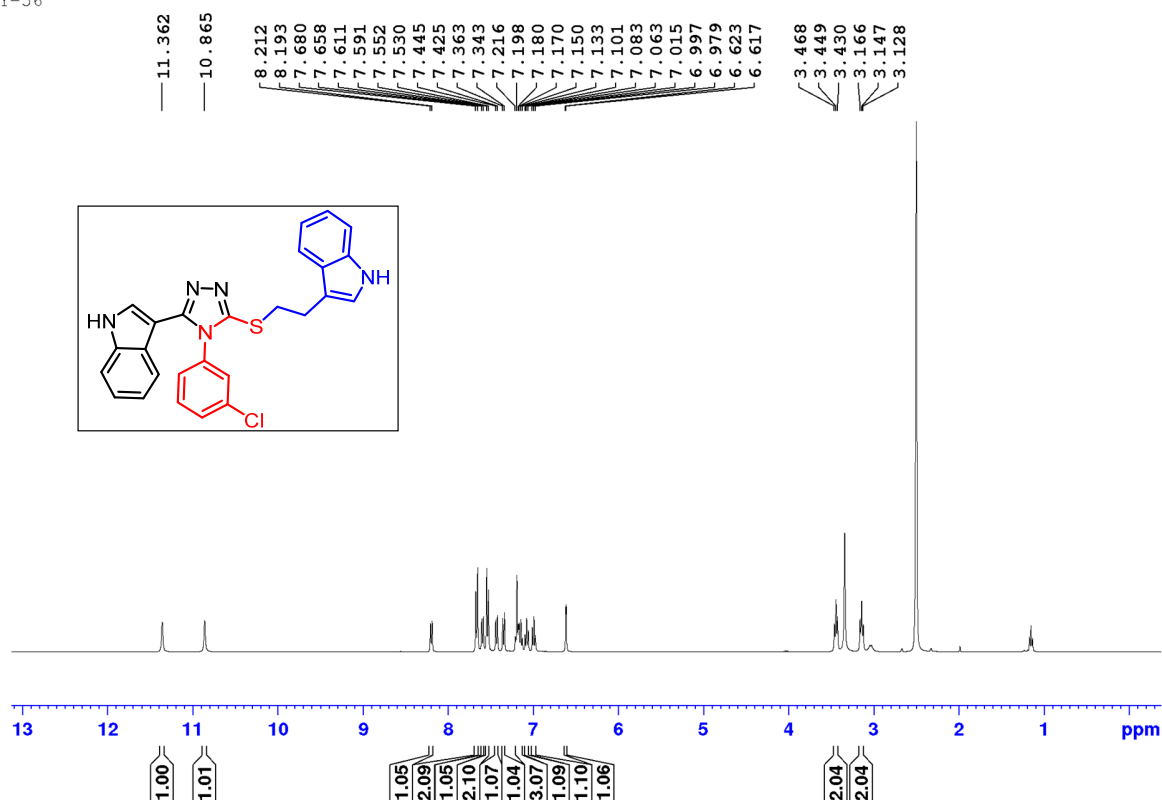

AY-56

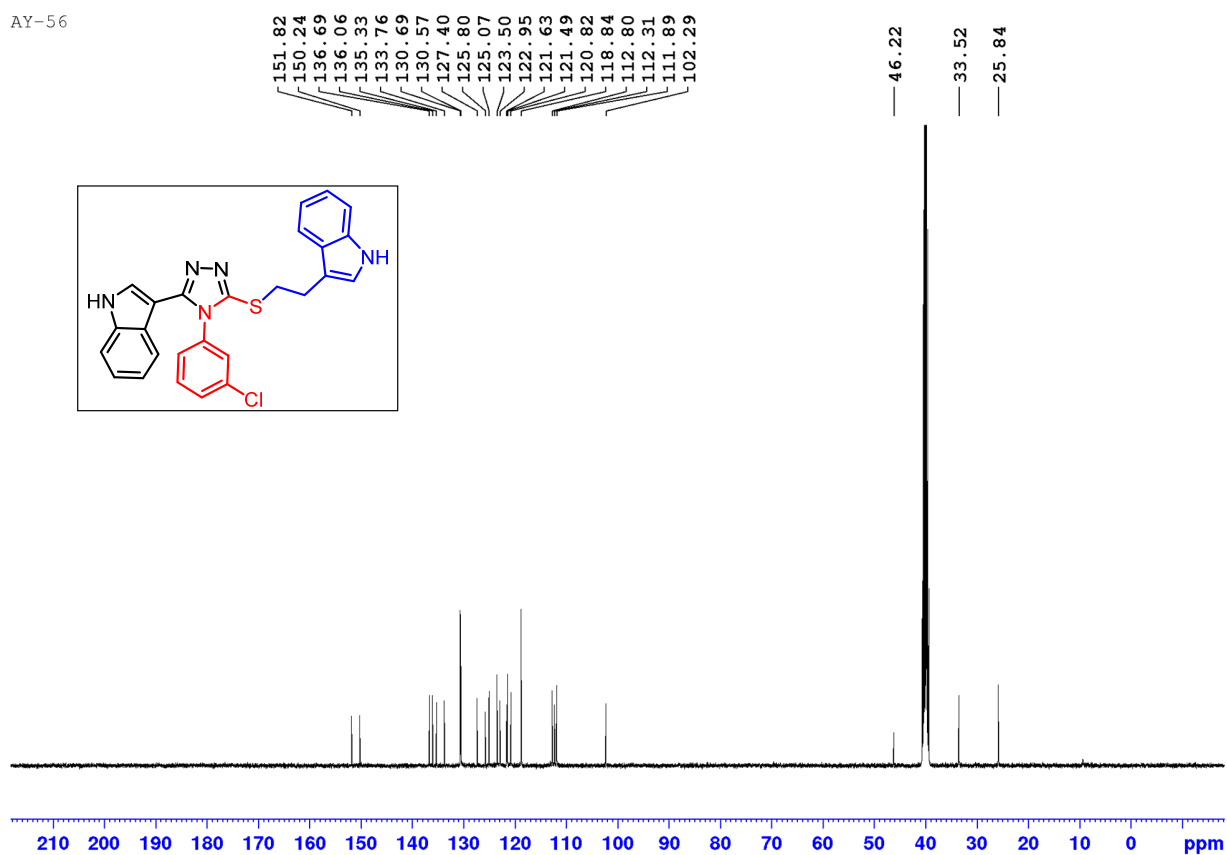

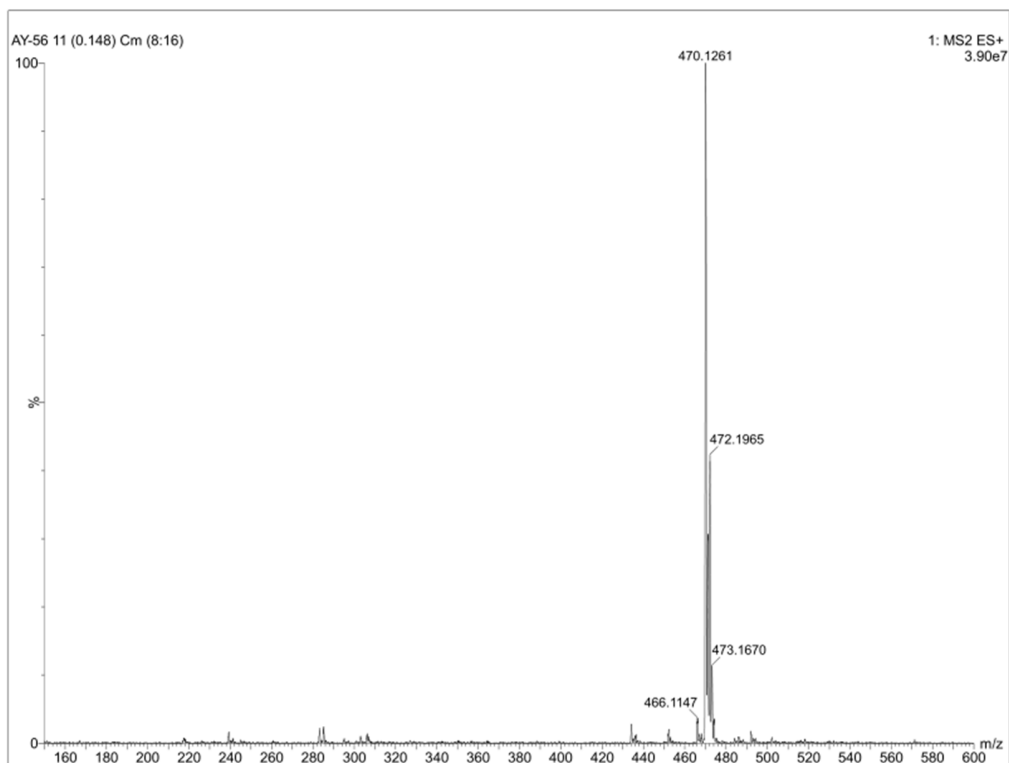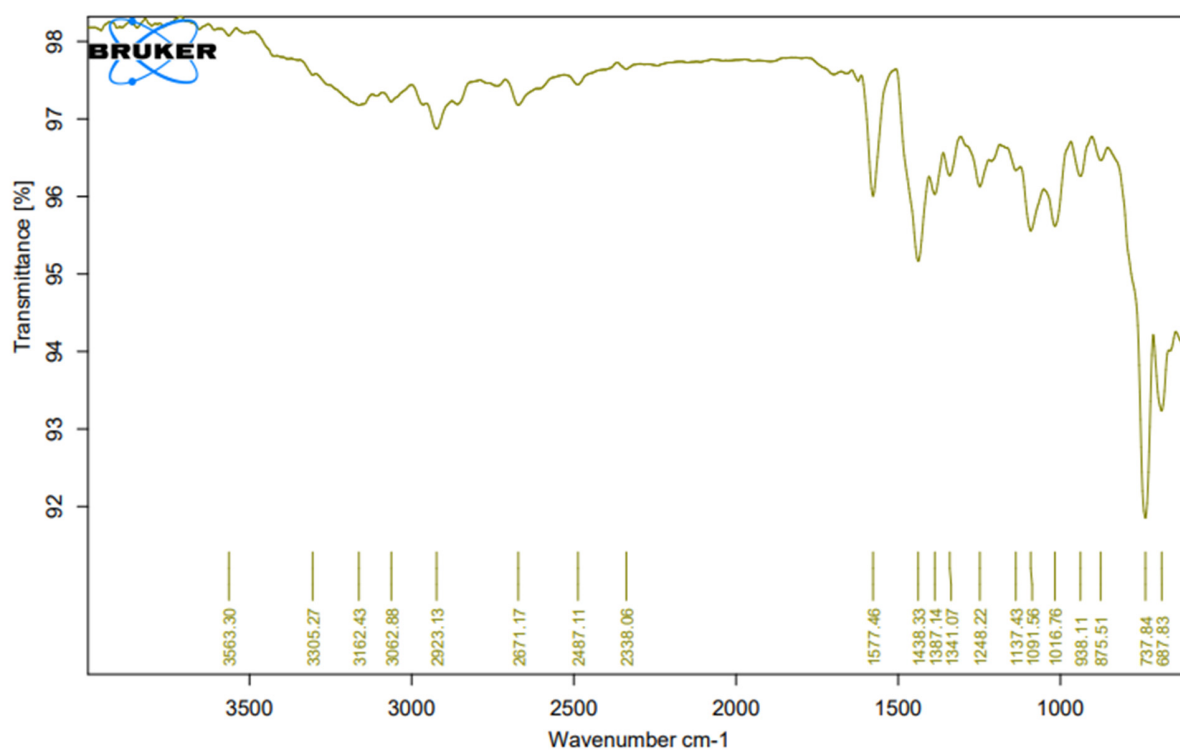

C:\Users\NIPERG\Desktop\Dayal\AY\AY-56.0

AY-56

Instrument type and / or accessory

01-11-2022



AY-236

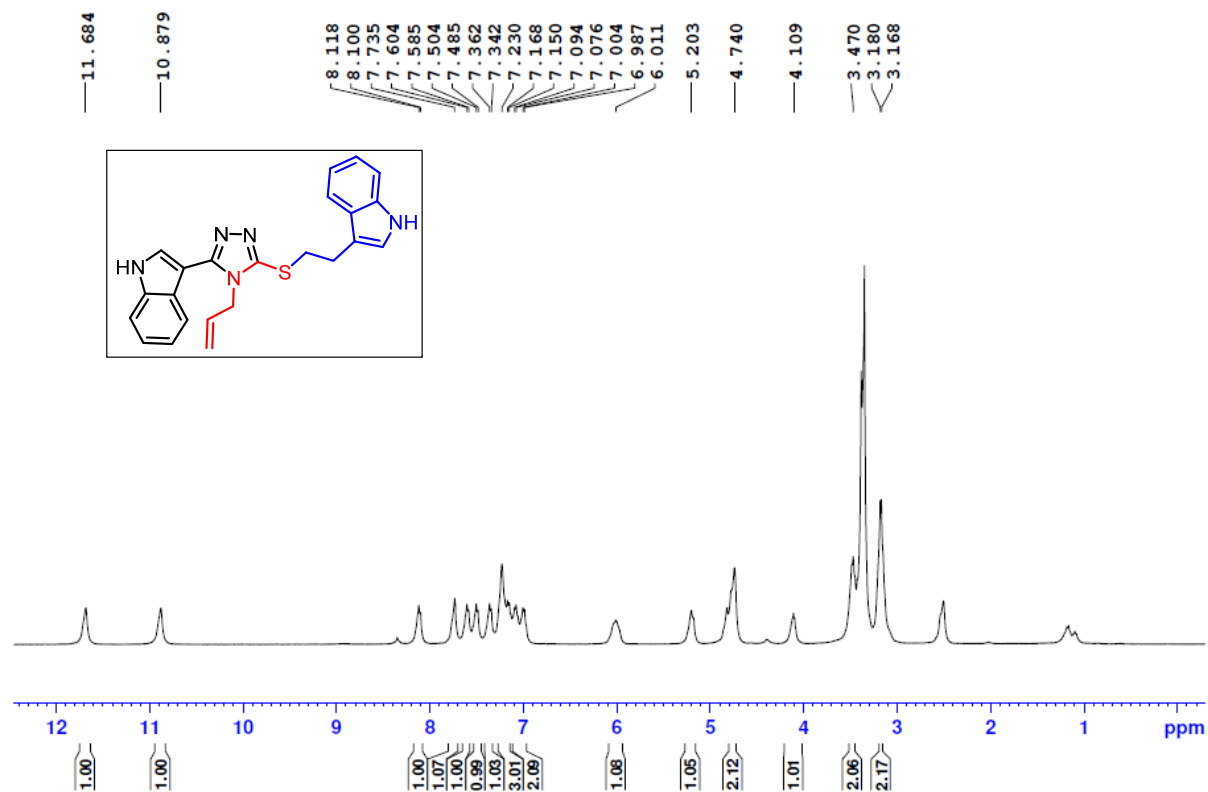

AY-236

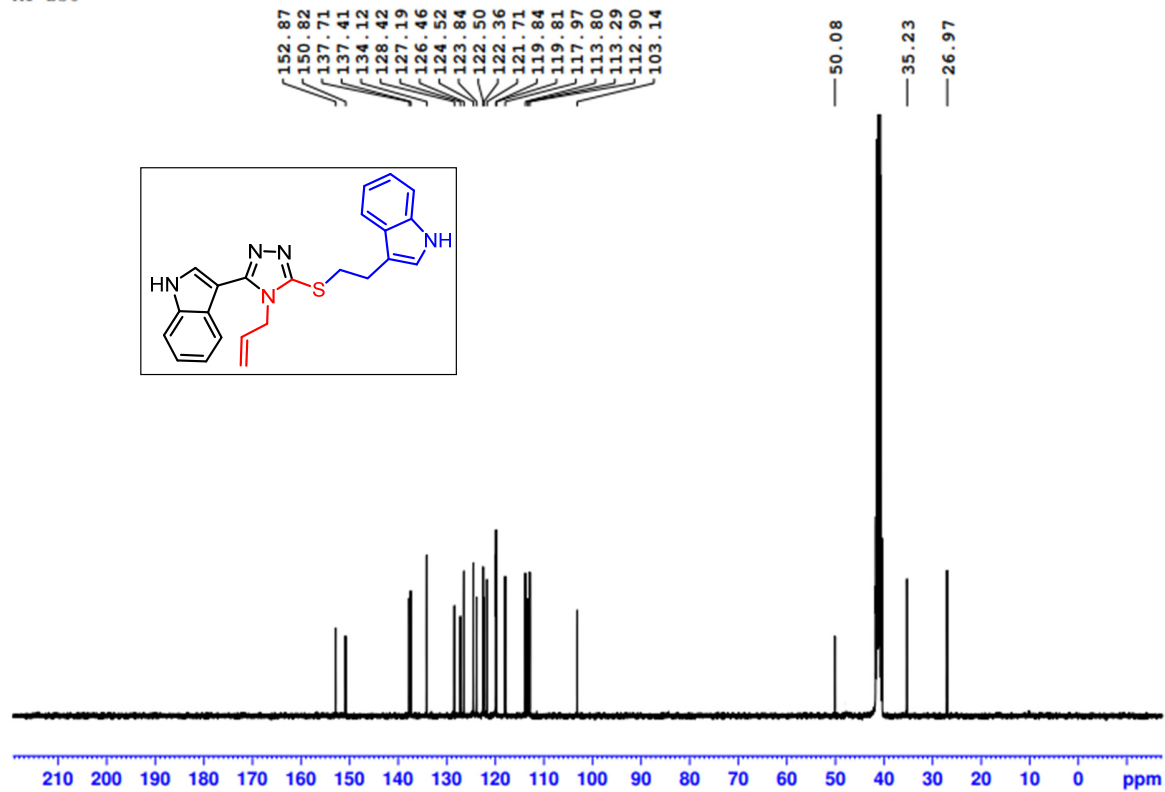

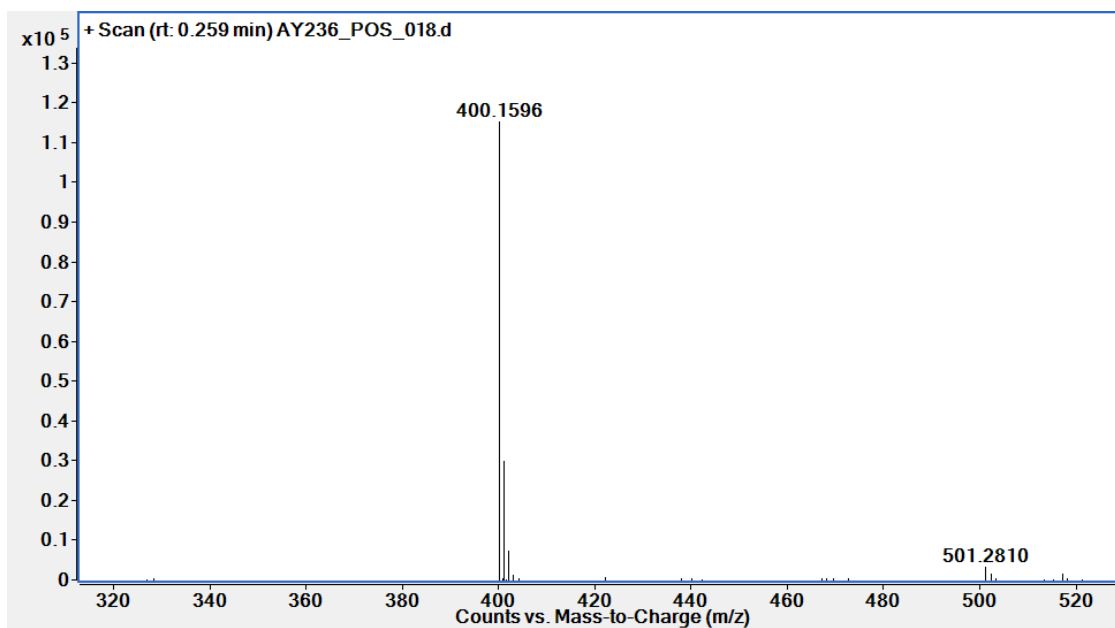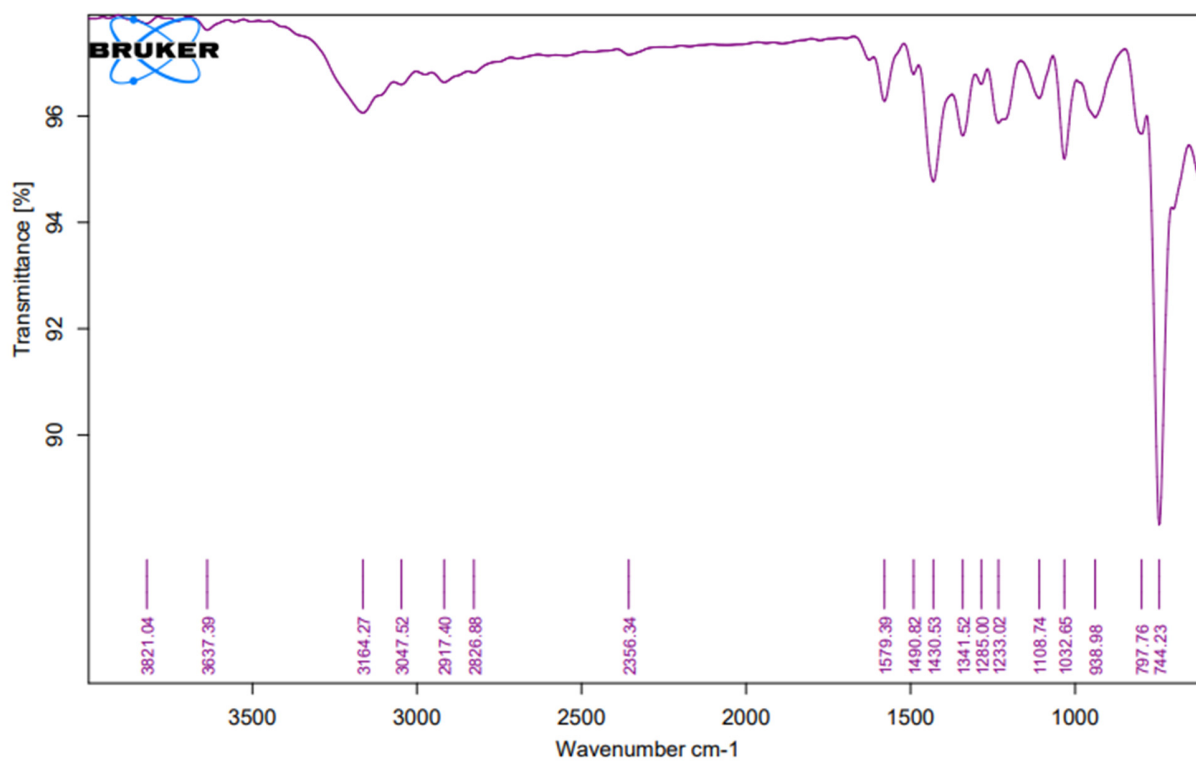

C:\Users\NIPERG\Desktop\Daya\AY\AY-236.0

AY-236

Instrument type and / or accessory

01-11-2022

AY-165

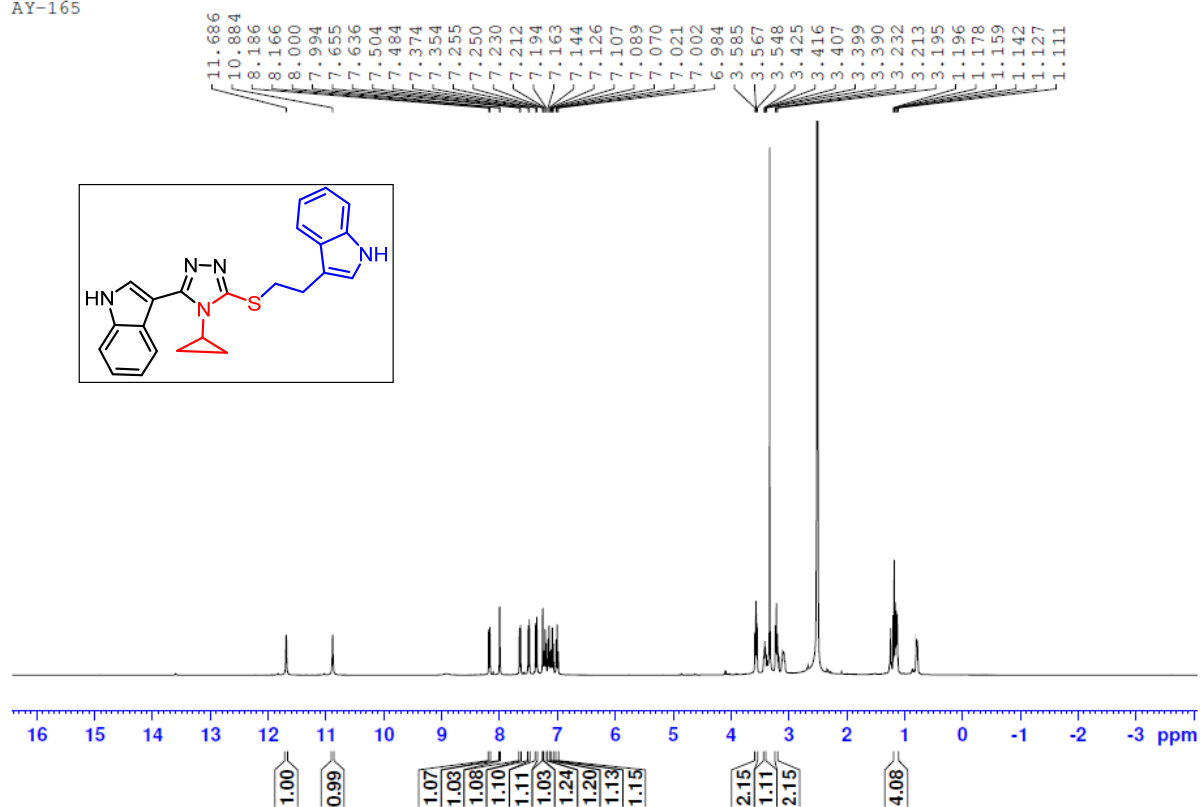

AY-165

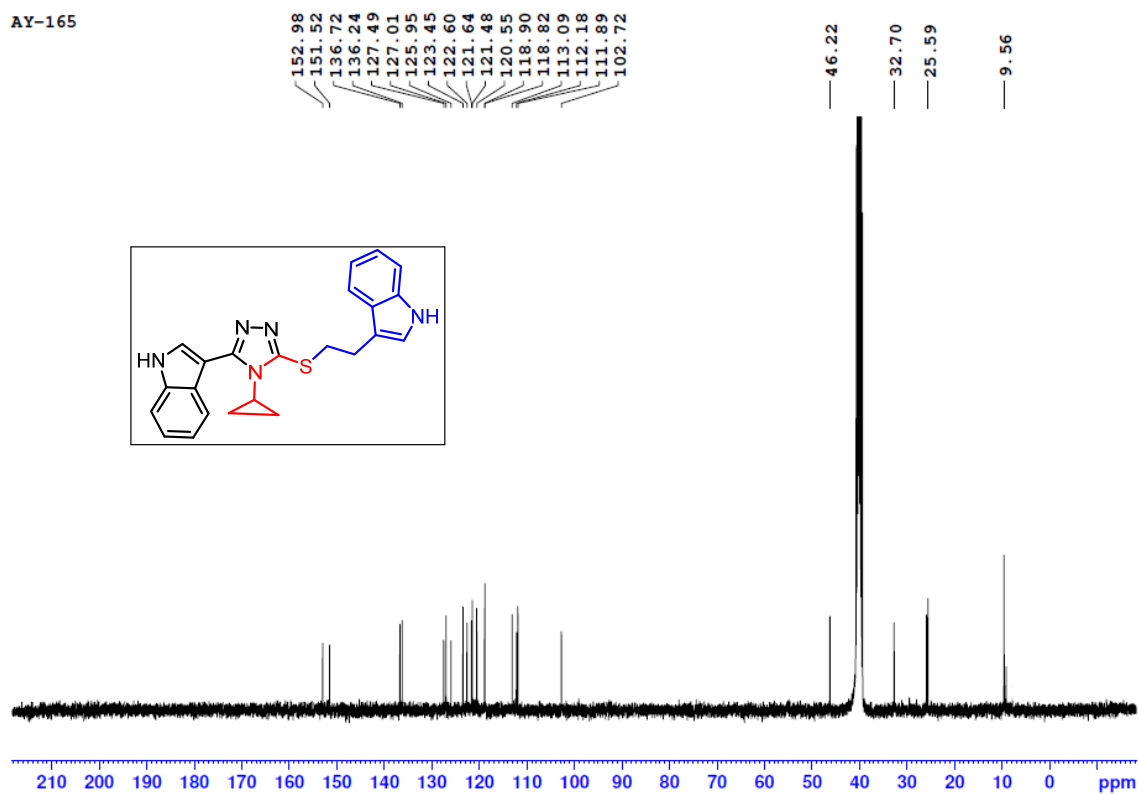

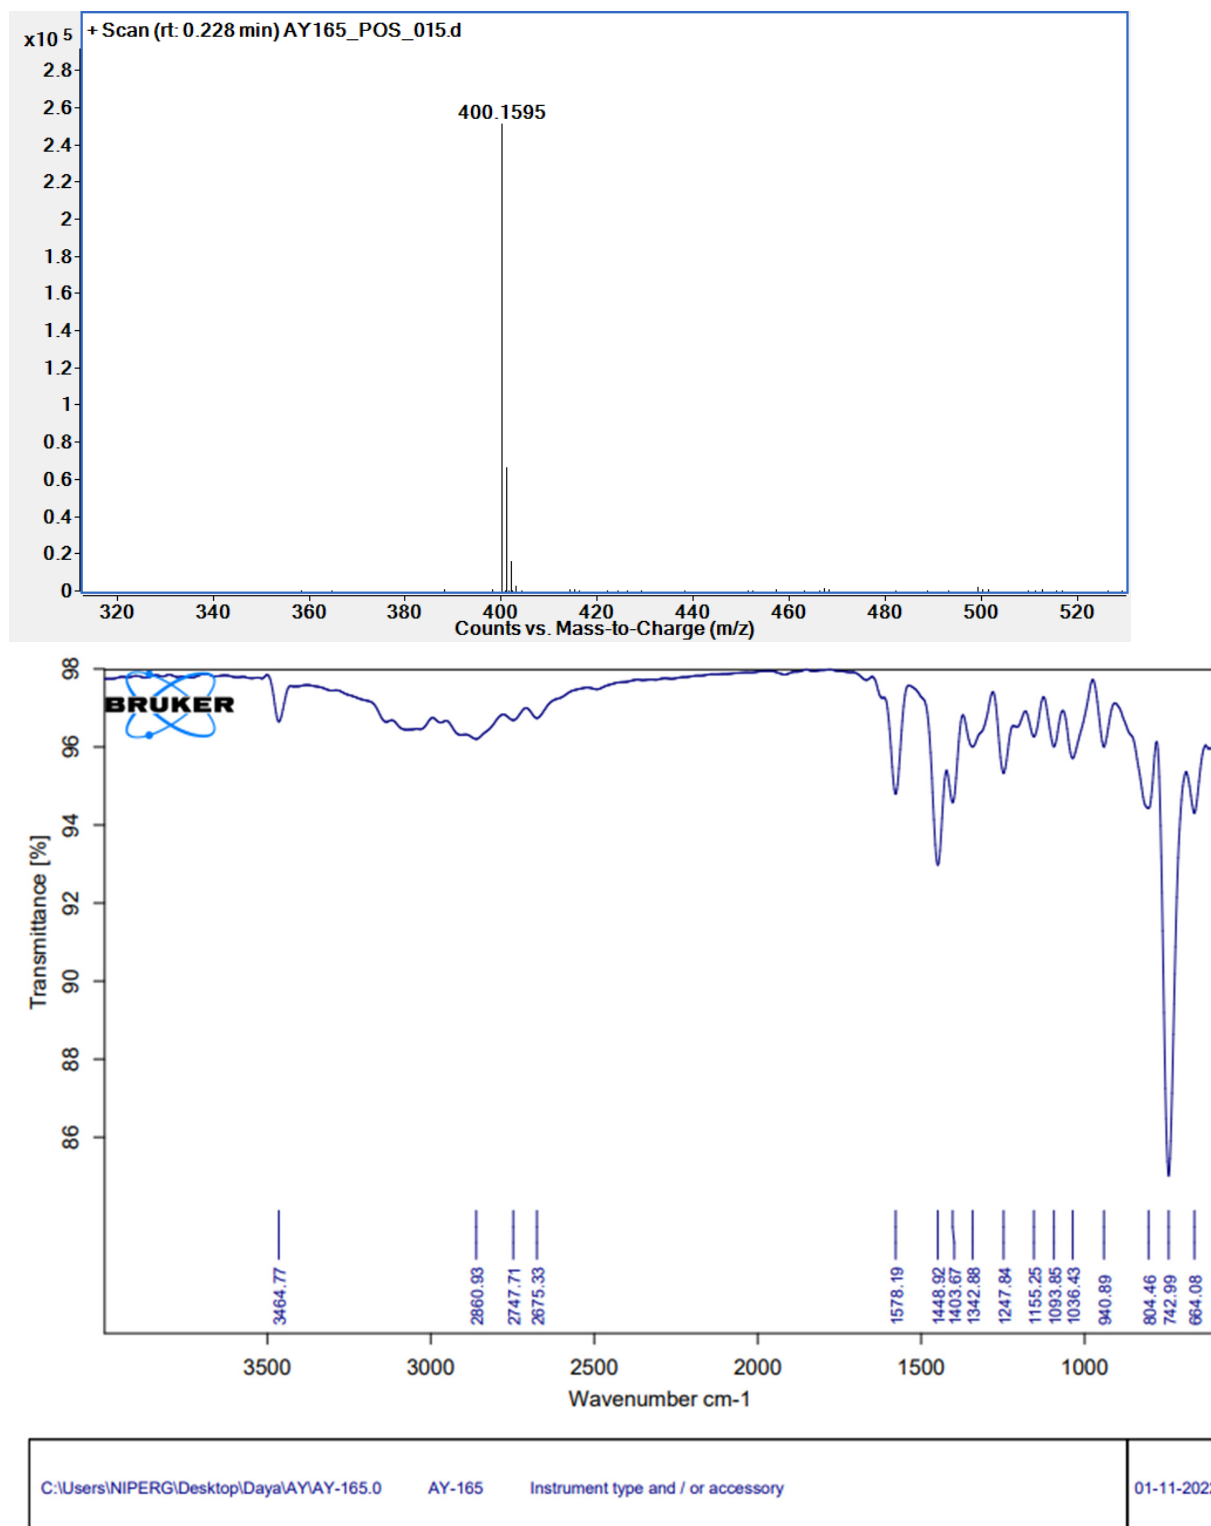

Figure S3: <sup>1</sup>H, <sup>13</sup>C NMR and Mass copies of all products.
